# Supplementary material for: Global alignment and assessment of TRP channel transmembrane domain structures to explore functional mechanisms
Source: eLife. 2020 Aug 17;9:e58660. doi: 10.7554/eLife.58660 (PMC7431192; doi:10.7554/eLife.58660)
Supplement: Figure 2—source data 1. [file elife-58660-fig2-data1.xlsx]

## Sheet: Used
PDB ID	Protein name	Species	UniProt ID	method	environment	ligand	paper link	doi	brief citation	publication date	Enforce Chain Order (counterclockwise, from extracellular view)	Chain1	Chain2	Chain3	Chain4	Chain5	Resolution (A)	structure source	family	ligand PDB ID	ligand names	pres1_start	tm1_start	tm1_stop	tm2_start	tm2_stop	tm3_start	tm3_stop	tm4_start	tm4_stop	tm5_start	tm5_stop	tm6_start	tm6_stop	trp_reent_stop	pre1_length	ext12_length	int23_length	ext34_length	int45_length	ext56_length	post5_length	TM_start	TM_stop	L12_start	L12_stop	pore_start	pore_stop	S1S4_start
3rqw	ELIC	Erwinia chrysanthemi	E0SJQ4	x-ray	detergent	inhibitor	https://www.nature.com/articles/ncomms1703	10.1038/ncomms1703	Pan et al., 2012	2012-03-06	AEDCB	A	E	D	C	B	2.913	OPM	ELIC	ach, gol, mes	acetylcholine, glycerol, 2-(N-Morpholino)-ethanesulfonic acid	200	206	224	230	248	263	283	301	315				315	317	6	6	15	18				200	317			263	315
2r9r	Kv 1.2/2.1 paddle chimera	Rattus norvegicus	N/A	x-ray	detergent	apo	https://www.nature.com/articles/nature06265	10.1038/nature06265	Long et al., 2007	2007-11-15	BDHF	B	D	H	F		2.4	OPM	Kv	k, nap, pgw	potassium ion, NADP Nicotinamide-adenine-dinucleotide phosphate, PHOSPHATIDYLGLYCEROL	140	160	184	221	243	254	272	287	306	320	346	381	403	417	20	37	11	15	14	35	14	140	417			320	403	160
5svl	P2X3	Homo sapiens	P56373	x-ray	detergent	activator	https://www.nature.com/articles/nature19367	10.1038/nature19367	Mansoor et al., 2016	2016-10-06	ACB	A	C	B			2.9	OPM	P2X	atp, mal, na, act, edo, nag, trs	adenosine-5'-triphosphate, maltose, sodium ion, acetate ion, 1,2-ethanediol, N-acetyl-D-glucosamine	14	22	46	318	343								343	346	8	272						14	346	56	308	0	343	22
6pw4	TRP1	Chlamydomonas reinhardtii	Q0Z852	cryo-EM	detergent	apo	https://www.nature.com/articles/s41467-019-12121-9#Sec8	10.1038/s41467-019-12121-9	McGoldrick et al., 2019	2019-09-13	ABCD	A	B	C	D		3.53	PDB, analyzed with OPM	TRP	pik, pio, cpl, pcw	PI(4,5)P2 dipalmitoyl (16:0,16:0), dioctanoyl l-alpha-phosphatidyl-d-myo-inositol 4,5-diphosphate, 1,2-DIOLEOYL-SN-GLYCERO-3-PHOSPHOCHOLINE	404	500	521	532	556	563	588	600	626	641	663	720	746	773	96	11	7	12	15	57	27	404	773			641	746	500
6pw5	TRP1	Chlamydomonas reinhardtii	Q0Z852	cryo-EM	nanodisc	apo	https://www.nature.com/articles/s41467-019-12121-9#Sec8	10.1038/s41467-019-12121-9	McGoldrick et al., 2019	2019-09-13	ABCD	A	B	C	D		3.45	PDB, analyzed with OPM	TRP	pik, pio, pcw	PI(4,5)P2 dipalmitoyl (16:0,16:0), dioctanoyl l-alpha-phosphatidyl-d-myo-inositol 4,5-diphosphate, 1-PALMITOYL-2-LINOLEOYL-SN-GLYCERO-3-PHOSPHOCHOLINE, 1,2-DIOLEOYL-SN-GLYCERO-3-PHOSPHOCHOLINE	406	500	522	533	556	569	585	601	626	642	663	719	747	773	94	11	13	16	16	56	26	406	773			642	747	500
3j9p	TRPA1	Homo sapiens	O75762	cryo-EM	amphipol	apo	https://www.nature.com/articles/nature14367	10.1038/nature14367	Paulsen et al., 2015	2015-04-23	ABCD	A	B	C	D		4.24	OPM	TRPA	none	none	680	720	739	767	785	807	823	830	850	870	892	934	957	1006	40	28	22	7	20	42	49	680	1006			870	957	720
5zbg	TRPC3	Homo sapiens	Q13507	cryo-EM	nanodisc	apo	https://www.nature.com/articles/s41422-018-0038-2	10.1038/s41422-018-0038-2	Tang et al., 2018	2018-04-26	ADCB	A	D	C	B		4.36	OPM	TRPC	none	none	291	375	392	425	445	455	477	525	545	561	587	630	655	692	84	33	10	48	16	43	37	291	692			561	655	375
5yx9	TRPC6	Homo sapiens	Q9Y210	cryo-EM	nanodisc	inhibitor	https://www.nature.com/articles/s41422-018-0038-2	10.1038/s41422-018-0038-2	Tang et al., 2018	2018-04-26	ADCB	A	D	C	B		3.8	OPM	TRPC	none	none	358	444	463	492	514	524	546	593	614	634	657	699	724	766	86	29	10	47	20	42	42	358	766			634	724	444
6g1k	TRPC4	Danio rerio	U3N7D8	cryo-EM	amphipol	apo	https://elifesciences.org/articles/36615	10.7554/eLife.36615	Vinayagam et al., 2018	2018-05-02	ACDB	A	C	D	B		3.6	OPM	TRPC	y01, 44e	cholesterol hemisuccinate, (2R)-3-(phosphonooxy)propane-1,2-diyl dihexanoate	284	365	384	401	422	432	454	476	496	515	538	592	617	660	81	17	10	22	19	54	43	284	660			515	617	365
6cud	TRPC3	Homo sapiens	Q13507	cryo-EM	detergent	apo	https://elifesciences.org/articles/36852	10.7554/eLife.36852	Fan et al., 2018	2018-05-04	ABCD	A	B	C	D		3.3	OPM	TRPC	6oe, fgj, nag	(2S)-3-{[(S)-(2-aminoethoxy)(hydroxy)phosphoryl]oxy}-2-(hexanoyloxy)propyl hexanoate, (2R)-3-hydroxypropane-1,2-diyl dihexanoate, N-acetyl-D-glucosamine	292	375	397	424	442	456	477	522	545	565	588	629	654	687	83	27	14	45	20	41	33	292	687			565	654	375
5z96	TRPC4	Mus musculus	Q9QUQ5	cryo-EM	detergent	apo	https://www.nature.com/articles/s41467-018-05247-9	10.1038/s41467-018-05247-9	Duan et al., 2018	2018-08-06	ABCD	A	B	C	D		3.28	OPM	TRPC	y01, na, lpp	cholesterol hemisuccinate, sodium ion, 1,2-DIPALMITOYL-SN-GLYCERO-3-PHOSPHATE; L-B,G-DIPALMITOYL-A-PHOSPHATIDIC ACID DISODIUM SALT; 3-SN-PHOSPHATIDIC ACID; 1,2-DIPALMITOYLDISODIUM SALT	285	367	385	401	422	432	454	473	496	515	539	592	617	665	82	16	10	19	19	53	48	285	665			515	617	367
6aei	TRPC5	Mus musculus	Q9QX29	cryo-EM	detergent	apo	https://advances.sciencemag.org/content/5/7/eaaw7935	10.1126/sciadv.aaw7935	Duan et al., 2018	2019-07-24	ABCD	A	B	C	D		2.89	OPM	TRPC	y01, na, lpp	cholesterol hemisuccinate, sodium ion, 2-(HEXADECANOYLOXY)-1-[(PHOSPHONOOXY)METHYL]ETHYL HEXADECANOATE	286	368	385	402	423	434	455	474	497	517	541	595	621	653	82	17	11	19	20	54	32	286	653			517	621	368
5wp6	TRPM4	Homo sapiens	Q8TD43	cryo-EM	detergent	activator	https://www.nature.com/articles/nature24674	10.1038/nature24674	Winkler et al., 2017	2017-12-14	ABCD	A	B	C	D		3.8	OPM	TRPM	dvt, ca	decavanadate, calcium	654	781	802	812	833	862	884	890	911	927	951	1017	1040	1091	127	10	29	6	16	66	51	654	1091			927	1040	781
6bcj	TRPM4	Mus musculus	Q7TN37	cryo-EM	nanodisc	apo	https://www.nature.com/articles/nature24997	10.1038/nature24997	Guo et al., 2017	2017-12-14	ABDC	A	B	D	C		3.14	OPM	TRPM	na	sodium ion	653	777	798	808	829	859	880	885	906	922	948	1013	1036	1090	124	10	30	5	16	65	54	653	1090			922	1036	777
6bcl	TRPM4	Mus musculus	Q7TN37	cryo-EM	nanodisc	apo	https://www.nature.com/articles/nature24997	10.1038/nature24997	Guo et al., 2017	2017-12-14	ABDC	A	B	D	C		3.54	OPM	TRPM	na	sodium ion	653	777	798	808	829	859	880	885	906	922	948	1013	1036	1090	124	10	30	5	16	65	54	653	1090			922	1036	777
6bco	TRPM4	Mus musculus	Q7TN37	cryo-EM	nanodisc	inhibitor	https://www.nature.com/articles/nature24997	10.1038/nature24997	Guo et al., 2017	2017-12-14	ABDC	A	B	D	C		2.88	OPM	TRPM	atp	adenosine-5'-triphosphate	653	777	798	808	829	859	880	885	906	923	948	1013	1036	1090	124	10	30	5	17	65	54	653	1090			923	1036	777
6bcq	TRPM4	Mus musculus	Q7TN37	cryo-EM	nanodisc	inhibitor	https://www.nature.com/articles/nature24997	10.1038/nature24997	Guo et al., 2017	2017-12-14	ABDC	A	B	D	C		3.25	OPM	TRPM	atp	adenosine-5'-triphosphate	653	777	798	808	829	859	880	885	906	923	948	1013	1036	1090	124	10	30	5	17	65	54	653	1090			923	1036	777
6bqr	TRPM4	Homo sapiens	Q8TD43	cryo-EM	nanodisc	apo	http://science.sciencemag.org/content/359/6372/228	10.1126/science.aar4510	Autzen et al., 2018	2018-01-12	ABDC	A	B	D	C		3.2	OPM	TRPM	y01	cholesterol hemisuccinate	655	781	802	812	833	859	883	890	913	929	951	1017	1044	1097	126	10	26	7	16	66	53	655	1097			929	1044	781
6bqv	TRPM4	Homo sapiens	Q8TD43	cryo-EM	nanodisc	activator	http://science.sciencemag.org/content/359/6372/228	10.1126/science.aar4510	Autzen et al., 2018	2018-01-12	ABDC	A	B	D	C		3.1	OPM	TRPM	y01, ca	cholesterol hemisuccinate, calcium ion	653	781	802	812	833	862	883	890	913	929	951	1017	1044	1094	128	10	29	7	16	66	50	653	1094			929	1044	781
6bpq	TRPM8	Ficedula albicollis	U3JD03	cryo-EM	detergent	apo	http://science.sciencemag.org/content/359/6372/237	10.1126/science.aan4325	Yin et al., 2018	2018-01-12	ABCD	A	B	C	D		4.1	OPM	TRPM	unk	L-peptide linking	656	736	757	766	787	791	815	829	851	859	884	950	974	1009	80	9	4	14	8	66	35	656	1009			859	974	736
6bwi	TRPM4	Homo sapiens	Q8TD43	cryo-EM	unknown	apo	https://www.pnas.org/content/115/10/2377.long	10.1073/pnas.1722038115	Duan et al., 2018	2018-02-20	ADCB	A	D	C	B		3.7	OPM	TRPM	y01, na, nag, unk	cholesterol hemisuccinate, sodium ion, N-acetyl-D-glucosamie	652	781	802	812	833	862	884	890	911	926	952	1017	1043	1071	129	10	29	6	15	65	28	652	1071			926	1043	781
6co7	TRPM2	Nematostella vectensis	A7T1N0	cryo-EM	detergent	activator	https://elifesciences.org/articles/36409	10.7554/eLife.36409	Zhang et al., 2018	2018-05-10	ADCB	A	D	C	B		3.07	OPM	TRPM	na, ca, nag, pov, clr	sodium ion, calcium ion, N-acetyl-D-glucosamine, POPC, cholesterol	676	839	860	877	898	915	936	944	968	981	1007	1060	1086	1136	163	17	17	8	13	53	50	676	1136			981	1086	839
5zx5	TRPM7	Mus musculus	Q923J1	cryo-EM	amphipol	apo	https://www.pnas.org/content/115/35/E8201.long	10.1073/pnas.1810719115	Duan et al., 2018	2018-08-14	ABCD	A	B	C	D		3.28	OPM	TRPM	y01	cholesterol hemisuccinate	720	854	875	882	904	922	944	959	980	1000	1023	1069	1093	1140	134	7	18	15	20	46	47	720	1140			1000	1093	854
6bwd	TRPM7	Mus musculus	Q923J1	cryo-EM	amphipol	apo	https://www.pnas.org/content/115/35/E8201.long	10.1073/pnas.1810719115	Duan et al., 2018	2018-08-14	ABCD	A*	B*	C	D*		3.7	OPM	TRPM	y01, mg, unk	cholesterol hemisuccinate, magnesium ion, L-peptide linking	556	695	713	723	740	761	781	798	818	841	859	909	928	976	139	10	21	17	23	50	48	556	976			841	928	695
6bwd	TRPM7	Mus musculus	Q923J1	cryo-EM	amphipol	apo	https://www.pnas.org/content/115/35/E8201.long	10.1073/pnas.1810719115	Duan et al., 2018	2018-08-14	ABCD	A	B	C*	D		3.7	OPM	TRPM	y01, mg, unk	cholesterol hemisuccinate, magnesium ion, L-peptide linking	373	512	530	540	557	578	598	615	635	658	676	726	745	793	139	10	21	17	23	50	48	373	793			658	745	512
6bwf	TRPM7	Mus musculus	Q923J1	cryo-EM	amphipol	apo	https://www.pnas.org/content/115/35/E8201.long	10.1073/pnas.1810719115	Duan et al., 2018	2018-08-14	ABCD	A	B	C	D		4.1	OPM	TRPM	unk	L-peptide linking	373	511	529	539	557	577	598	613	634	654	677	725	747	791	138	10	20	15	20	48	44	373	791			654	747	511
6drj	TRPM2	Danio rerio (BLAST)	A0A0R4IMY7	cryo-EM	detergent	activator	https://www.nature.com/articles/s41586-018-0558-4	10.1038/s41586-018-0558-4	Huang et al., 2018	2018-09-24	ABCD	A	B	C	D		3.3	OPM	TRPM	apr, ca	adenosine-5-diphosphoribose, calcium ion	692	810	832	839	862	881	901	910	930	946	971	1037	1064	1114	118	7	19	9	16	66	50	692	1114			946	1064	810
6drk	TRPM2	Danio rerio (BLAST)	A0A0R4IMY7	cryo-EM	detergent	apo	https://www.nature.com/articles/s41586-018-0558-4	10.1038/s41586-018-0558-4	Huang et al., 2018	2018-09-24	ABCD	A	B	C	D		3.8	OPM	TRPM	none	none	692	811	834	841	860	881	903	906	930	946	972	1035	1063	1110	119	7	21	3	16	63	47	692	1110			946	1063	811
6mix	TRPM2	Homo sapiens	O94759	cryo-EM	detergent	apo	http://science.sciencemag.org/content/362/6421/eaav4809.long	10.1126/science.aav4809	Wang et al., 2018	2018-12-21	ABCD	A	B	C	D		3.6	OPM	TRPM	none	none	716	800	820	827	844	868	891	893	914	933	955	1022	1042	1079	84	7	24	2	19	67	37	716	1079			933	1042	800
6nr2	TRPM8	Ficedula albicollis	U3JD03	cryo-EM	detergent	activator	http://science.sciencemag.org/content/early/2019/02/06/science.aav9334.long	10.1126/science.aav9334	Yin et al., 2019	2019-03-01	ABCD	A	B	C	D		4	OPM	TRPM	kxp, kxs, unk	(2S)-1-{[(R)-hydroxy{[(1R,2R,3S,4R,5R,6S)-2,3,6-trihydroxy-4,5-bis(phosphonooxy)cyclohexyl]oxy}phosphoryl]oxy}-3-(octadecanoyloxy)propan-2-yl icosa-5,8,11,14-tetraenoate, menthol analog (WS-12)	655	737	758	764	787	793	817	826	850	862	887	953	977	1026	82	6	6	9	12	66	49	655	1026			862	977	737
6nr3	TRPM8	Ficedula albicollis	U3JD03	cryo-EM	detergent	activator	http://science.sciencemag.org/content/early/2019/02/06/science.aav9334.long	10.1126/science.aav9334	Yin et al., 2019	2019-03-01	ABCD	A	B	C	D		3.4	OPM	TRPM	ca, kx7, kxp, unk	calcium, icilin, (2S)-1-{[(R)-hydroxy{[(1R,2R,3S,4R,5R,6S)-2,3,6-trihydroxy-4,5-bis(phosphonooxy)cyclohexyl]oxy}phosphoryl]oxy}-3-(octadecanoyloxy)propan-2-yl icosa-5,8,11,14-tetraenoate	656	736	757	766	786	796	817	826	847	858	887	953	977	1026	80	9	10	9	11	66	49	656	1026			858	977	736
6nr4	TRPM8	Ficedula albicollis	U3JD03	cryo-EM	detergent	activator	http://science.sciencemag.org/content/early/2019/02/06/science.aav9334.long	10.1126/science.aav9334	Yin et al., 2019	2019-03-01	ABCD	A	B	C	D		4.3	OPM	TRPM	unk	L-peptide linking	655	737	757	766	787	793	817	826	851	862	887	955	977	1022	82	9	6	9	11	68	45	655	1022			862	977	737
6d73	TRPM2	Danio rerio		cryo-EM	detergent	activator	https://www.nature.com/articles/s41467-019-11733-5	10.1038/s41467-019-11733-5	Yin et al., 2019	2019-08-20	ADCB	A	D	C	B		3.8	OPM	TRPM	ca, unk	calcium ion, L-peptide linking	689	810	832	839	863	878	901	907	930	943	971	1038	1066	1094	121	7	15	6	13	67	28	689	1094			943	1066	810
6pkv	TRPM2	Danio rerio		cryo-EM	detergent	apo	https://www.nature.com/articles/s41467-019-11733-5	10.1038/s41467-019-11733-5	Yin et al., 2019	2019-08-20	ABCD	A	B	C	D		4.3	OPM	TRPM	unk	L-peptide linking	690	810	832	839	862	880	901	910	933	939	971	1038	1063	1095	120	7	18	9	6	67	32	690	1095			939	1063	810
6pkw	TRPM2	Danio rerio		cryo-EM	detergent	apo	https://www.nature.com/articles/s41467-019-11733-5	10.1038/s41467-019-11733-5	Yin et al., 2019	2019-08-20	ADCB	A	D	C	B		4.5	OPM	TRPM	unk	L-peptide linking	692	810	832	841	862	880	901	909	933	942	971	1038	1063	1094	118	9	18	8	9	67	31	692	1094			942	1063	810
6pkx	TRPM2	Danio rerio		cryo-EM	amphipol	activator	https://www.nature.com/articles/s41467-019-11733-5	10.1038/s41467-019-11733-5	Yin et al., 2019	2019-08-20	ADCB	A	D	C	B		4.2	OPM	TRPM	ca, ar6, unk	calcium ion, Adenosine-5-Diphosphoribose, L-peptide linking	689	811	833	837	859	881	901	906	930	946	971	1037	1062	1093	122	4	22	5	16	66	31	689	1093			946	1062	811
6o6a	TRPM8	Parus major	N/A	cryo-EM	amphipol	apo	https://science.sciencemag.org/content/early/2019/09/04/science.aax6672	10.1126/science.aax6672	Diver et al., 2019	2019-09-27	ABCD	A	B	C	D		4.1	PDB, analyzed with OPM	TRPM	y01, na	cholesterol hemisuccinate, sodium ion	645	730	748	757	777	787	806	820	838	853	875	945	968	1000	85	9	10	14	15	70	32	645	1000			853	968	730
6o6r	TRPM8	Parus major	N/A	cryo-EM	amphipol	inhibitor	https://science.sciencemag.org/content/early/2019/09/04/science.aax6672	10.1126/science.aax6672	Diver et al., 2019	2019-09-27	ABCD	A	B	C	D		3.2	PDB, analyzed with OPM	TRPM	y01, na, lq7, und, 9pe	cholesterol hemisuccinate, sodium ion, N-(3-aminopropyl)-2-[(3-methylphenyl)methoxy]-N-[(thiophen-2-yl)methyl]benzamide (AMTB), undecane lipid fragment, 3-SN-phosphatidylethanolamine	646	729	748	757	777	784	806	820	839	853	875	945	968	1000	83	9	7	14	14	70	32	646	1000			853	968	729
6o72	TRPM8	Parus major	N/A	cryo-EM	amphipol	inhibitor	https://science.sciencemag.org/content/early/2019/09/04/science.aax6672	10.1126/science.aax6672	Diver et al., 2019	2019-09-27	ABCD	A	B	C	D		3	PDB, analyzed with OPM	TRPM	y01, na, und, t14, 9pe	cholesterol hemisuccinate, sodium ion, undecane lipid fragment, 3-{7-(trifluoromethyl)-5-[2-(trifluoromethyl)phenyl]-1H-benzimidazol-2-yl}-1-oxa-2-azaspiro[4.5]dec-2-ene (TC-I 2014), 3-SN-phosphatidylethanolamine	645	729	748	757	778	784	806	820	839	853	875	945	968	1000	84	9	6	14	14	70	32	645	1000			853	968	729
6o77	TRPM8	Parus major	N/A	cryo-EM	amphipol	activator	https://science.sciencemag.org/content/early/2019/09/04/science.aax6672	10.1126/science.aax6672	Diver et al., 2019	2019-09-27	ABCD	A	B	C	D		3.2	PDB, analyzed with OPM	TRPM	y01, ca	cholesterol hemisuccinate, calcium ion	645	727	748	757	777	788	808	817	837	853	877	943	969	995	82	9	11	9	16	66	26	645	995			853	969	727
5wpq	TRPML1	Mus musculus	Q99J21	cryo-EM	nanodisc	apo	https://www.nature.com/articles/nature24035	10.1038/nature24035	Chen et al., 2017	2017-10-19	ABCD	A	B	C	D		3.64	OPM	TRPML	na	sodium ion	38	64	87	297	317	354	376	383	405	428	452	488	514	527	26	210	37	7	23	36	13	38	527	97	287	428	514	64
5wpt	TRPML1	Mus musculus	Q99J21	cryo-EM	nanodisc	apo	https://www.nature.com/articles/nature24035	10.1038/nature24035	Chen et al., 2017	2017-10-19	ABCD	A	B	C	D		3.75	OPM	TRPML	nag	N-acetyl-D-glucosamine	38	64	85	297	318	353	374	384	405	425	448	488	514	527	26	212	35	10	20	40	13	38	527	95	287	425	514	64
5wpv	TRPML1	Mus musculus	Q99J21	cryo-EM	nanodisc	apo	https://www.nature.com/articles/nature24035	10.1038/nature24035	Chen et al., 2017	2017-10-19	ABCD	A	B	C	D		3.59	OPM	TRPML	na	sodium ion	38	64	85	297	318	353	374	384	405	424	448	488	514	527	26	212	35	10	19	40	13	38	527	95	287	424	514	64
5wj5	TRPML1	Homo sapiens	Q9GZU1	cryo-EM	detergent	apo	https://www.nature.com/articles/nature24036	10.1038/nature24036	Schmiege et al., 2017	2017-10-19	ABCD	A	B	C	D		3.72	OPM	TRPML	nag	N-acetyl-D-glucosamine	60	65	85	296	317	354	374	384	405	425	448	488	514	526	5	211	37	10	20	40	12	60	526	95	286	425	514	65
5wj9	TRPML1	Homo sapiens	Q9GZU1	cryo-EM	detergent	activator	https://www.nature.com/articles/nature24036	10.1038/nature24036	Schmiege et al., 2017	2017-10-19	ABCD	A	B	C	D		3.49	OPM	TRPML	aqv	2-{2-oxo-2-[(4S)-2,2,4-trimethyl-3,4-dihydroquinolin-1(2H)-yl]ethyl}-1H-isoindole-1,3(2H)-dione	38	64	85	296	317	353	375	383	405	428	449	488	511	526	26	211	36	8	23	39	15	38	526	95	286	428	511	64
5w3s	TRPML3	Callithrix jacchus	F6RG56	cryo-EM	amphipol	apo	https://www.nature.com/articles/nature24055	10.1038/nature24055	Hirschi et al., 2017	2017-10-19	ACDB	A	C	D	B		2.94	OPM	TRPML	y01, na, 3pe	cholesterol hemisuccinate, sodium ion, 3-SN-PHOSPHATIDYLETHANOLAMINE	33	61	82	285	305	340	361	371	393	408	435	472	498	526	28	203	35	10	15	37	28	33	526	92	275	408	498	61
6aye	TRPML3	Homo sapiens	Q8TDD5	cryo-EM	amphipol	apo	https://www.nature.com/articles/nsmb.3502	10.1038/nsmb.3502	Zhou et al., 2017	2017-11-06	ADCB	A	D	C	B		4.06	OPM	TRPML	none	none	33	61	82	285	305	340	361	371	393	408	435	472	501	526	28	203	35	10	15	37	25	33	526	92	275	408	501	61
6ayf	TRPML3	Homo sapiens	Q8TDD5	cryo-EM	amphipol	activator	https://www.nature.com/articles/nsmb.3502	10.1038/nsmb.3502	Zhou et al., 2017	2017-11-06	ADCB	A	D	C	B		3.62	OPM	TRPML	nag	N-acetyl-D-glucosamine	33	62	82	284	308	340	361	371	393	411	435	472	501	526	29	202	32	10	18	37	25	33	526	92	274	411	501	62
6ayg	TRPML3	Homo sapiens	Q8TDD5	cryo-EM	detergent	inhibitor	https://www.nature.com/articles/nsmb.3502	10.1038/nsmb.3502	Zhou et al., 2017	2017-11-06	ADCB	A	D	C	B		4.65	OPM	TRPML	none	none	40	58	81	286	311	340	360	372	396	409	434	472	502	526	18	205	29	12	13	38	24	40	526	91	276	409	502	58
6e7p	TRPML1	Homo sapiens	Q9GZU1	cryo-EM	detergent	activator	https://www.nature.com/articles/s41467-018-06493-7	10.1038/s41467-018-06493-7	Fine et al., 2018	2018-10-10	ABCD	A	B	C	D		3.5	PDB, analyzed with OPM	TRPML	hz7	(1R,2S,3S,4R,5S,6R)-5-{[(R)-[(2R)-2,3-bis{[(1S)-1-hydroxyoctyl]oxy}propoxy](hydroxy)phosphoryl]oxy}-2,4,6-trihydroxycyclohexane-1,3-diyl bis[dihydrogen (phosphate)]	38	64	84	297	321	351	373	384	408	421	448	488	518	526	26	213	30	11	13	40	8	38	526	94	287	421	518	64
6e7y	TRPML1	Homo sapiens	Q9GZU1	cryo-EM	detergent	inhibitor	https://www.nature.com/articles/s41467-018-06493-7	10.1038/s41467-018-06493-7	Fine et al., 2018	2018-10-10	ABCD	A	B	C	D		3.5	PDB, analyzed with OPM	TRPML	pio	dioctanoyl l-alpha-phosphatidyl-d-myo-inositol 4,5-diphosphate	38	64	85	296	317	353	374	384	405	425	448	488	514	526	26	211	36	10	20	40	12	38	526	95	286	425	514	64
6e7z	TRPML1	Homo sapiens	Q9GZU1	cryo-EM	detergent	activator	https://www.nature.com/articles/s41467-018-06493-7	10.1038/s41467-018-06493-7	Fine et al., 2018	2018-10-10	ABCD	A	B	C	D		3.5	PDB, analyzed with OPM	TRPML	hz7, aqv	(1R,2S,3S,4R,5S,6R)-5-{[(R)-[(2R)-2,3-bis{[(1S)-1-hydroxyoctyl]oxy}propoxy](hydroxy)phosphoryl]oxy}-2,4,6-trihydroxycyclohexane-1,3-diyl bis[dihydrogen (phosphate)], 2-{2-oxo-2-[(4S)-2,2,4-trimethyl-3,4-dihydroquinolin-1(2H)-yl]ethyl}-1H-isoindole-1,3(2H)-dione	38	64	84	297	320	353	373	384	405	425	448	488	514	526	26	213	33	11	20	40	12	38	526	94	287	425	514	64
5vkq	NOMPC	Drosophila melanogaster	E0A9E1	cryo-EM	nanodisc	apo	https://www.nature.com/articles/nature22981	10.1038/nature22981	Jin et al., 2017	2017-07-06	ADCB	A	D	C	B		3.55	OPM	TRPN	pcf	1,2-DIACYL-SN-GLYCERO-3-PHOSHOCHOLINE	1217	1305	1321	1338	1356	1363	1387	1396	1420	1439	1461	1529	1554	1602	88	17	7	9	19	68	48	1217	1602			1439	1554	1305
5t4d	PKD2	Homo sapiens	Q13563	cryo-EM	nanodisc	apo	https://www.sciencedirect.com/science/article/pii/S0092867416313332?via%3Dihub	10.1016/j.cell.2016.09.048	Shen et al., 2016	2016-10-20	ABCD	A	B	C	D		3	OPM	TRPP	nag	N-acetyl-D-glucosamine	216	220	240	472	491	507	527	557	577	593	619	655	681	694	4	232	16	30	16	36	13	216	694	250	462	593	681	220
5k47	PKD2	Homo sapiens	Q13563	cryo-EM	detergent	apo	https://www.nature.com/articles/nsmb.3343	10.1038/nsmb.3343	Grieben et al., 2016	2016-12-19	ADCB	A	D	C	B		4.22	OPM	TRPP	nag	N-acetyl-D-glucosamine	213	220	240	472	491	507	527	557	577	593	619	655	681	702	7	232	16	30	16	36	21	213	702	250	462	593	681	220
5mke	PKD2	Homo sapiens	Q13563	cryo-EM	amphipol	activator	https://www.nature.com/articles/nsmb.3357	10.1038/nsmb.3357	Wilkes et al., 2017	2017-01-16	ADCB	A	D	C	B		4.3	OPM	TRPP	px6, ca, chs, nag, plm	1,2-dipalmitoyl-SN-glycero-3-phosphate, calcium ion, 4-amino-5-cyclohexyl-3-hydroxy-pentanoic acid, N-acetyl-D-glucosamine, palmitic acid	215	221	242	471	492	508	528	553	577	597	619	655	677	695	6	229	16	25	20	36	18	215	695	252	461	597	677	221
5mkf	PKD2	Homo sapiens	Q13563	cryo-EM	amphipol	activator	https://www.nature.com/articles/nsmb.3357	10.1038/nsmb.3357	Wilkes et al., 2017	2017-01-16	ADCB	A	D	C	B		4.2	OPM	TRPP	px6, ca, chs, nag, plm	1,2-dipalmitoyl-SN-glycero-3-phosphate, calcium ion, 4-amino-5-cyclohexyl-3-hydroxy-pentanoic acid, N-acetyl-D-glucosamine, palmitic acid	215	221	241	471	493	506	528	556	578	597	620	654	677	695	6	230	13	28	19	34	18	215	695	251	461	597	677	221
5z1w	PKD2L1	Mus musculus	A2A259	cryo-EM	amphipol	apo	https://www.nature.com/articles/s41467-018-03606-0	10.1038/s41467-018-03606-0	Su et al., 2018	2018-03-22	ADBC	A	D	B	C		3.38	OPM	TRPP	nag	N-acetyl-D-glucosamine	101	103	122	348	372	384	405	434	456	480	500	534	556	563	2	226	12	29	24	34	7	101	563	132	338	480	556	103
6d1w	PKD2	Homo sapiens	Q13563	cryo-EM	amphipol	activator	https://www.nature.com/articles/s41467-018-04586-x	10.1038/s41467-018-04586-x	Zheng et al., 2018	2018-06-13	ADBC	A	D	B	C		3.54	OPM	TRPP	nag	N-acetyl-D-glucosamine	216	221	242	472	491	506	527	556	578	597	619	655	676	682	5	230	15	29	19	36	6	216	682	252	462	597	676	221
6du8	PKD2L1	Homo sapiens	Q9P0L9	cryo-EM	amphipol	apo	https://elifesciences.org/articles/36931	10.7554/eLife.36931	Hulse et al., 2018	2018-07-13	ABDC	A	B	D	C		3.11	OPM	TRPP	nag	N-acetyl-D-glucosamine	101	103	120	353	375	385	405	437	454	482	499	534	556	561	2	233	10	32	28	35	5	101	561	130	343	482	556	103
6a70	PKD1	Homo sapiens	P98161	cryo-EM	detergent	apo	http://science.sciencemag.org/content/361/6406/eaat9819.long	10.1126/science.aat9819	Su et al., 2018	2018-09-07	BAFG	B*	A	F	G		3.6	OPM	TRPP	none	none	3656	3670	3690	3899	3920	3933	3953	3986	4006	4022	4046	4083	4106	4120	14	209	13	33	16	37	14	3656	4120	3700	3889	4022	4106	3670
6a70	PKD2	Homo sapiens	Q13563	cryo-EM	detergent	apo	http://science.sciencemag.org/content/361/6406/eaat9819.long	10.1126/science.aat9819	Su et al., 2018	2018-09-07	BAFG	B	A*	F*	G*		3.6	OPM	TRPP	none	none	219	221	240	475	496	506	525	560	577	594	615	655	681	694	2	235	10	35	17	40	13	219	694	250	465	594	681	221
3j5p	TRPV1	Rattus norvegicus	O35433	cryo-EM	amphipol	apo	https://www.nature.com/articles/nature12822	10.1038/nature12822	Liao et al., 2013	2013-12-05	ABDC	A	B	D	C		3.28	OPM	TRPV	unk	L-peptide linking	394	435	453	472	497	511	531	537	556	572	598	656	682	719	41	19	14	6	16	58	37	394	719			572	682	435
3j9j	TRPV1	Rattus norvegicus	O35433	cryo-EM	amphipol	apo	https://www.nature.com/articles/nature12822	10.1038/nature12822	Liao et al., 2013	2013-12-05	ABDC	A	B	D	C		3.275	OPM	TRPV	none	none	1	53	74	92	117	130	152	156	176	192	218	252	279	315	52	18	13	4	16	34	36	1	315			192	279	53
3j5q	TRPV1	Rattus norvegicus	O35433	cryo-EM	amphipol	activator	https://www.nature.com/articles/nature12823	10.1038/nature12823	Cao et al., 2013	2013-12-05	EBDG	E	B	D	G		3.8	OPM	TRPV	unk	L-peptide linking	393	434	454	472	497	511	532	537	556	568	598	656	682	719	41	18	14	5	12	58	37	393	719			568	682	434
3j5r	TRPV1	Rattus norvegicus	O35433	cryo-EM	amphipol	activator	https://www.nature.com/articles/nature12823	10.1038/nature12823	Cao et al., 2013	2013-12-05	ACDB	A	C	D	B		4.2	OPM	TRPV	unk	L-peptide linking	394	435	453	472	497	511	531	537	556	572	598	656	682	719	41	19	14	6	16	58	37	394	719			572	682	435
5hi9	TRPV2	Rattus norvegicus	Q9WUD2	cryo-EM	detergent	apo	https://www.nature.com/articles/ncomms11130	10.1038/ncomms11130	Huynh et al., 2015	2015-10-07	ADCB	A	D	C	B		4.4	OPM	TRPV	none	none	355	394	413	432	454	471	492	497	515	533	558	620	641	684	39	19	17	5	18	62	43	355	684			533	641	394
5an8	TRPV2	Oryctolagus cuniculus	G1SNM3	cryo-EM	amphipol	apo	https://www.nature.com/articles/nsmb.3159	10.1038/nsmb.3159	Zubcevic et al., 2016	2016-01-18	ACDB	A	C	D	B		3.8	OPM	TRPV	none	none	353	391	411	430	455	468	490	495	514	531	556	616	640	682	38	19	13	5	17	60	42	353	682			531	640	391
5irx	TRPV1	Rattus norvegicus	O35433	cryo-EM	nanodisc	activator	https://www.nature.com/articles/nature17964	10.1038/nature17964	Gao et al., 2016	2016-06-16	ACDB	A	C	D	B		2.95	OPM	TRPV	6oe, 6eu, 6o8, 6o9, DkTx	(2S)-3-{[(S)-(2-aminoethoxy)(hydroxy)phosphoryl]oxy}-2-(hexanoyloxy)propyl hexanoate, resiniferatoxin, (4R,7S)-4-hydroxy-N,N,N-trimethyl-4,9-dioxo-7-[(pentanoyloxy)methyl]-3,5,8-trioxa-4lambda~5~-phosphatetradecan-1-aminium, (2S)-2-(acetyloxy)-3-{[(R)-(2-aminoethoxy)(hydroxy)phosphoryl]oxy}propyl pentanoate, double-knot toxin	394	435	454	472	497	511	532	536	556	577	598	656	683	714	41	18	14	4	21	58	31	394	714			577	683	435
5irz	TRPV1	Rattus norvegicus	O35433	cryo-EM	nanodisc	apo	https://www.nature.com/articles/nature17964	10.1038/nature17964	Gao et al., 2016	2016-06-16	BCED	B	C	E	D		3.28	OPM	TRPV	6oe, 6o8, 6es	(2S)-3-{[(S)-(2-aminoethoxy)(hydroxy)phosphoryl]oxy}-2-(hexanoyloxy)propyl hexanoate, (4R,7S)-4-hydroxy-N,N,N-trimethyl-4,9-dioxo-7-[(pentanoyloxy)methyl]-3,5,8-trioxa-4lambda~5~-phosphatetradecan-1-aminium, (2S)-1-{[(R)-hydroxy{[(1R,2R,3S,4S,5S,6S)-2,3,4,5,6-pentahydroxycyclohexyl]oxy}phosphoryl]oxy}-3-(pentanoyloxy)propan-2-yl decanoate	394	435	454	472	497	511	532	546	556	576	598	656	682	714	41	18	14	14	20	58	32	394	714			576	682	435
5is0	TRPV1	Rattus norvegicus	O35433	cryo-EM	nanodisc	inhibitor	https://www.nature.com/articles/nature17964	10.1038/nature17964	Gao et al., 2016	2016-06-16	BCDE	B	C	D	E		3.43	OPM	TRPV	6et	capsazepine	394	435	454	472	497	511	532	546	556	576	598	656	682	717	41	18	14	14	20	58	35	394	717			576	682	435
5wo7	TRPV6	Rattus norvegicus	Q9R186	x-ray	detergent	apo	https://www.nature.com/articles/s41598-017-10993-9	10.1038/s41598-017-10993-9	Singh et al., 2017	2017-09-06	ADCB	A	D	C	B		3.25	PDB biological assembly, analyzed with OPM	TRPV	ca, dtb	calcium ion, D-DESTHIOBIOTIN	291	329	348	382	404	423	444	448	468	488	511	552	573	609	38	34	19	4	20	41	36	291	609			488	573	329
5wo9	TRPV6	Rattus norvegicus	Q9R186	x-ray	detergent	apo	https://www.nature.com/articles/s41598-017-10993-9	10.1038/s41598-017-10993-9	Singh et al., 2017	2017-09-06	ADCB	A	D	C	B		3.9	PDB biological assembly, analyzed with OPM	TRPV	ca, dtb	calcium ion, D-DESTHIOBIOTIN	291	327	348	382	404	423	444	448	469	484	511	552	576	609	36	34	19	4	15	41	33	291	609			484	576	327
5woa	TRPV6	Rattus norvegicus	Q9R186	x-ray	detergent	apo	https://www.nature.com/articles/s41598-017-10993-9	10.1038/s41598-017-10993-9	Singh et al., 2017	2017-09-06	ADCB	A	D	C	B		3.9	PDB biological assembly, analyzed with OPM	TRPV	gd	gadolinium ion	291	329	348	382	404	423	444	448	468	488	511	552	573	609	38	34	19	4	20	41	36	291	609			488	573	329
5iwk	TRPV6 (not domain-swapped)	Rattus norvegicus	Q9R186	x-ray	detergent	apo	https://www.nature.com/articles/s41598-017-10993-9	10.1038/s41598-017-10993-9	Singh et al., 2017	2017-09-06	ADBC	A	D	B	C		3.25	OPM	TRPV	ca, dtb	calcium ion, desthiobiotin	287	328	348	382	407	424	443	449	468	488	511	552	573	609	41	34	17	6	20	41	36	287	609			488	573	328
6b5v	TRPV5	Oryctolagus cuniculus	Q9XSM3	cryo-EM	detergent	inhibitor	https://www.nature.com/articles/s41594-017-0009-1	10.1038/s41594-017-0009-1	Hughes et al., 2018	2018-01-01	ABDC	A	B	D	C		4.8	OPM	TRPV	ca, ecl	calcium ion, econazole	289	330	350	384	408	424	444	451	469	489	511	553	575	609	41	34	16	7	20	42	34	289	609			489	575	330
6bo8	TRPV6	Homo sapiens	Q9H1D0	cryo-EM	nanodisc	apo	https://www.nature.com/articles/nature25182	10.1038/nature25182	McGoldrick et al., 2018	2018-01-11	ADCB	A	D	C	B		3.6	OPM	TRPV	none	none	291	329	349	384	403	427	445	451	469	490	512	553	579	609	38	35	24	6	21	41	30	291	609			490	579	329
6bo9	TRPV6	Homo sapiens	Q9H1D0	cryo-EM	amphipol	apo	https://www.nature.com/articles/nature25182	10.1038/nature25182	McGoldrick et al., 2018	2018-01-11	ADCB	A	D	C	B		4	OPM	TRPV	none	none	291	329	349	384	403	427	445	451	469	490	512	553	579	610	38	35	24	6	21	41	31	291	610			490	579	329
6boa	TRPV6	Homo sapiens	Q9H1D0	cryo-EM	amphipol	apo	https://www.nature.com/articles/nature25182	10.1038/nature25182	McGoldrick et al., 2018	2018-01-11	ADCB	A	D	C	B		4.2	OPM	TRPV	none	none	291	329	349	383	403	427	445	450	472	485	512	553	575	610	38	34	24	5	13	41	35	291	610			485	575	329
6bob	TRPV6	Rattus norvegicus	Q9R186	cryo-EM	nanodisc	apo	https://www.nature.com/articles/nature25182	10.1038/nature25182	McGoldrick et al., 2018	2018-01-11	ADCB	A	D	C	B		3.9	OPM	TRPV	none	none	291	328	348	383	407	424	443	448	469	480	511	552	576	610	37	35	17	5	11	41	34	291	610			480	576	328
6bbj	TRPV4	Xenopus tropicalis	F7BWY7	cryo-EM	detergent	apo	https://www.nature.com/articles/s41594-018-0037-5	10.1038/s41594-018-0037-5	Deng et al., 2018	2018-02-26	ABDC	A	B	D	C		3.8	OPM	TRPV	none	none	428	469	487	501	529	543	565	570	589	605	628	689	711	747	41	14	14	5	16	61	36	428	747			605	711	469
6bwj	TRPV2	Oryctolagus cuniculus	G1SNM3	x-ray	detergent	activator	https://www.nature.com/articles/s41594-018-0059-z	10.1038/s41594-018-0059-z	Zubcevic et al., 2018	2018-04-30	ABCD	A	B	C	D		3.1	OPM	TRPV	6eu, ca	resiniferatoxin, calcium ion	353	388	410	431	456	469	480	494	517	529	556	618	642	678	35	21	13	14	12	62	36	353	678			529	642	388
6bwm	TRPV2	Oryctolagus cuniculus	G1SNM3	x-ray	detergent	apo	https://www.nature.com/articles/s41594-018-0059-z	10.1038/s41594-018-0059-z	Zubcevic et al., 2018	2018-04-30	ABCD	A	B	C	D		3.9	OPM	TRPV	ca	calcium ion	353	388	410	431	456	468	490	494	517	526	556	620	639	678	35	21	12	4	9	64	39	353	678			526	639	388
6d7o	TRPV6	Rattus norvegicus	Q9R186	x-ray	detergent	inhibitor	https://www.nature.com/articles/s41467-018-04828-y	10.1038/s41467-018-04828-y	Singh et al., 2018	2018-06-25	ADBC	A	D	B	C		3.45	OPM	TRPV	ca, dtb, fz4	calcium ion, D-DESTHIOBIOTIN, 2-aminoethyl diphenylborinate	290	329	348	382	402	423	444	448	468	484	511	552	573	610	39	34	21	4	16	41	37	290	610			484	573	329
6d7p	TRPV6	Rattus norvegicus	Q9R186	x-ray	detergent	apo	https://www.nature.com/articles/s41467-018-04828-y	10.1038/s41467-018-04828-y	Singh et al., 2018	2018-06-25	ADBC	A	D	B	C		3.37	OPM	TRPV	ca, dtb	calcium ion, D-DESTHIOBIOTIN	286	329	348	382	406	423	443	448	468	488	511	552	573	610	43	34	17	5	20	41	37	286	610			488	573	329
6d7q	TRPV6	Rattus norvegicus	Q9R186	x-ray	detergent	inhibitor	https://www.nature.com/articles/s41467-018-04828-y	10.1038/s41467-018-04828-y	Singh et al., 2018	2018-06-25	ADBC	A	D	B	C		3.5	OPM	TRPV	ca, dtb, fz4	calcium ion, D-DESTHIOBIOTIN, 2-aminoethyl diphenylborinate	286	329	348	382	402	423	444	448	468	484	511	552	573	610	43	34	21	4	16	41	37	286	610			484	573	329
6d7s	TRPV6	Homo sapiens	Q9H1D0	cryo-EM	amphipol	apo	https://www.nature.com/articles/s41467-018-04828-y	10.1038/s41467-018-04828-y	Singh et al., 2018	2018-06-25	ADCB	A	D	C	B		4.34	OPM	TRPV	none	none	290	329	349	383	403	425	445	449	469	489	512	553	578	610	39	34	22	4	20	41	32	290	610			489	578	329
6d7t	TRPV6	Homo sapiens	Q9H1D0	cryo-EM	amphipol	inhibitor	https://www.nature.com/articles/s41467-018-04828-y	10.1038/s41467-018-04828-y	Singh et al., 2018	2018-06-25	ADCB	A	D	C	B		4.44	OPM	TRPV	ca	calcium ion	288	329	349	383	408	423	445	449	469	485	512	553	577	611	41	34	15	4	16	41	34	288	611			485	577	329
6d7v	TRPV6	Rattus norvegicus	Q9R186	x-ray	detergent	inhibitor	https://www.nature.com/articles/s41467-018-04828-y	10.1038/s41467-018-04828-y	Singh et al., 2018	2018-06-25	ADBC	A	D	B	C		4.3	OPM	TRPV	fyy, ca	2-aminoethyl (4-bromophenyl)phenylborinate, calcium ion	287	329	348	382	402	423	444	448	468	484	511	552	573	610	42	34	21	4	16	41	37	287	610			484	573	329
6d7x	TRPV6	Rattus norvegicus	Q9R186	x-ray	detergent	inhibitor	https://www.nature.com/articles/s41467-018-04828-y	10.1038/s41467-018-04828-y	Singh et al., 2018	2018-06-25	ADBC	A	D	B	C		3.6	OPM	TRPV	fyy, ca, dtb	2-aminoethyl (4-bromophenyl)phenylborinate, calcium ion, D-DESTHIOBIOTIN	287	329	348	382	402	423	444	448	468	488	511	552	573	609	42	34	21	4	20	41	36	287	609			488	573	329
6e2f	TRPV6	Homo sapiens	Q9H1D0	cryo-EM	amphipol	inhibitor	https://www.ncbi.nlm.nih.gov/pmc/articles/PMC6093632/	10.1126/sciadv.aau6088	Singh et al., 2018	2018-08-15	ADCB	A	D	C	B		3.9	OPM	TRPV	calmodulin, ca	calmodulin, calcium ion	288	330	349	383	408	424	445	451	469	485	512	553	575	610	42	34	16	6	16	41	35	288	610			485	575	330
6e2g	TRPV6	Rattus norvegicus	Q9R186	cryo-EM	amphipol	inhibitor	https://www.ncbi.nlm.nih.gov/pmc/articles/PMC6093632/	10.1126/sciadv.aau6088	Singh et al., 2018	2018-08-15	ADCB	A	D	C	B		3.6	OPM	TRPV	calmodulin, ca	calmodulin, calcium ion	287	328	348	383	404	423	443	450	468	487	511	552	577	609	41	35	19	7	19	41	32	287	609			487	577	328
6dvw	TRPV3	Mus musculus	Q8K424	cryo-EM	detergent	apo	https://www.nature.com/articles/s41594-018-0108-7	10.1038/s41594-018-0108-7	Singh et al., 2018	2018-08-20	ABCD	A	B	C	D		4.3	OPM	TRPV	none	none	402	440	461	481	506	512	542	547	566	585	608	652	674	711	38	20	6	5	19	44	37	402	711			585	674	440
6dvy	TRPV3	Mus musculus	Q8K424	cryo-EM	detergent	activator	https://www.nature.com/articles/s41594-018-0108-7	10.1038/s41594-018-0108-7	Singh et al., 2018	2018-08-20	ABCD	A	B	C	D		4	OPM	TRPV	fz4	2-aminoethyl diphenylborinate	402	439	460	481	506	521	539	548	566	572	607	652	676	710	37	21	15	9	6	45	34	402	710			572	676	439
6dvz	TRPV3	Mus musculus	Q8K424	cryo-EM	detergent	activator	https://www.nature.com/articles/s41594-018-0108-7	10.1038/s41594-018-0108-7	Singh et al., 2018	2018-08-20	ABCD	A	B	C	D		4	OPM	TRPV	fz4	2-aminoethyl diphenylborinate	402	440	460	481	506	520	540	548	566	587	608	652	678	709	38	21	14	8	21	44	31	402	709			587	678	440
6dmr	TRPV5	Oryctolagus cuniculus	Q9XSM3	cryo-EM	detergent	apo	https://www.nature.com/articles/s41467-018-06753-6	10.1038/s41467-018-06753-6	Hughes et al., 2018	2018-10-10	ABDC	A	B	D	C		3.9	OPM	TRPV	none	none	291	328	349	383	408	422	445	450	469	485	512	554	578	611	37	34	14	5	16	42	33	291	611			485	578	328
6dmu	TRPV5	Oryctolagus cuniculus	Q9XSM3	cryo-EM	nanodisc	activator	https://www.nature.com/articles/s41467-018-06753-6	10.1038/s41467-018-06753-6	Hughes et al., 2018	2018-10-10	ABDC	A	B	D	C		3.9	OPM	TRPV	pio	dioctanoyl l-alpha-phosphatidyl-d-myo-inositol 4,5-diphosphate	289	330	349	384	405	423	445	450	469	489	512	553	575	613	41	35	18	5	20	41	38	289	613			489	575	330
6dmw	TRPV5	Oryctolagus cuniculus	Q9XSM3	cryo-EM	detergent	inhibitor	https://www.nature.com/articles/s41467-018-06753-6	10.1038/s41467-018-06753-6	Hughes et al., 2018	2018-10-10	ABDC	A	B	D	C		3.9	OPM	TRPV	calmodulin, ca	calmodulin, calcium ion	291	328	349	383	408	422	445	450	469	485	512	554	578	610	37	34	14	5	16	42	32	291	610			485	578	328
6mho	TRPV3	Homo sapiens	Q8NET8	cryo-EM	amphipol	apo	https://www.nature.com/articles/s41467-018-07117-w	10.1038/s41467-018-07117-w	Zubcevic et al., 2018	2018-11-14	ADCB	A	D	C	B		3.4	OPM	TRPV	none	none	402	442	462	480	503	520	542	546	566	582	608	651	674	708	40	18	17	4	16	43	34	402	708			582	674	442
6mhs	TRPV3	Homo sapiens	Q8NET8	cryo-EM	amphipol	activator	https://www.nature.com/articles/s41467-018-07117-w	10.1038/s41467-018-07117-w	Zubcevic et al., 2018	2018-11-14	ADCB	A	D	C	B		3.2	OPM	TRPV	none	none	402	440	461	481	506	520	542	546	566	582	608	650	677	708	38	20	14	4	16	42	31	402	708			582	677	440
6mhv	TRPV3	Homo sapiens	Q8NET8	cryo-EM	amphipol	activator	https://www.nature.com/articles/s41467-018-07117-w	10.1038/s41467-018-07117-w	Zubcevic et al., 2018	2018-11-14	ADCB	A	D	C	B		3.5	OPM	TRPV	none	none	402	442	462	480	506	520	542	546	566	582	608	650	674	710	40	18	14	4	16	42	36	402	710			582	674	442
6mhw	TRPV3	Homo sapiens	Q8NET8	cryo-EM	amphipol	activator	https://www.nature.com/articles/s41467-018-07117-w	10.1038/s41467-018-07117-w	Zubcevic et al., 2018	2018-11-14	ADCB	A	D	C	B		3.5	OPM	TRPV	none	none	402	441	460	484	506	520	541	546	566	582	608	651	674	710	39	24	14	5	16	43	36	402	710			582	674	441
6mhx	TRPV3	Homo sapiens	Q8NET8	cryo-EM	amphipol	activator	https://www.nature.com/articles/s41467-018-07117-w	10.1038/s41467-018-07117-w	Zubcevic et al., 2018	2018-11-14	ADCB	A	D	C	B		3.5	OPM	TRPV	none	none	402	440	461	480	506	520	541	546	568	578	608	650	676	710	38	19	14	5	10	42	34	402	710			578	676	440
6bo4	TRPV2	Rattus norvegicus	Q9WUD2	cryo-EM	detergent	apo	https://www.nature.com/articles/s41594-018-0168-8	10.1038/s41594-018-0168-8	Dosey et al., 2019	2018-12-31	ADCB	A	D	C	B		4	OPM	TRPV	none	none	353	392	413	432	457	469	491	496	516	532	558	619	643	676	39	19	12	5	16	61	33	353	676			532	643	392
6bo5	TRPV2	Rattus norvegicus	Q9WUD2	cryo-EM	detergent	apo	https://www.nature.com/articles/s41594-018-0168-8	10.1038/s41594-018-0168-8	Dosey et al., 2019	2018-12-31	ADCB	A	D	C	B		3.6	OPM	TRPV	none	none	352	393	413	429	457	471	492	496	515	536	557	619	642	677	41	16	14	4	21	62	35	352	677			536	642	393
6o1n	TRPV5	Oryctolagus cuniculus	Q9XSM3	cryo-EM	nanodisc	apo	https://www.pnas.org/content/116/18/8869	10.1073/pnas.1820323116	Dang et al., 2019	2019-04-11	ADCB	A	D	C	B		2.9	OPM	TRPV	none	none	289	330	349	383	405	423	445	450	469	489	512	553	578	609	41	34	18	5	20	41	31	289	609			489	578	330
6o1p	TRPV5	Oryctolagus cuniculus	Q9XSM3	cryo-EM	nanodisc	apo	https://www.pnas.org/content/116/18/8869	10.1073/pnas.1820323116	Dang et al., 2019	2019-04-11	ADCB	A	D	C	B		3	OPM	TRPV	none	none	289	330	349	383	405	423	445	449	469	488	512	553	578	609	41	34	18	4	19	41	31	289	609			488	578	330
6o1u	TRPV5	Oryctolagus cuniculus	Q9XSM3	cryo-EM	nanodisc	activator	https://www.pnas.org/content/116/18/8869	10.1073/pnas.1820323116	Dang et al., 2019	2019-04-11	ABCD	A	B	C	D		2.8	OPM	TRPV	none	none	289	330	349	383	405	423	445	449	469	489	513	553	575	609	41	34	18	4	20	40	34	289	609			489	575	330
6o20	TRPV5	Oryctolagus cuniculus	Q9XSM3	cryo-EM	detergent	inhibitor	https://www.pnas.org/content/116/18/8869	10.1073/pnas.1820323116	Dang et al., 2019	2019-04-11	ADCB	A	D	C	B		3.3	OPM	TRPV	calmodulin, ca	calmodulin, calcium ion	289	330	349	383	405	423	445	449	469	489	512	553	576	610	41	34	18	4	20	41	34	289	610			489	576	330
6ot2	TRPV3	Homo sapiens	Q8NET8	cryo-EM	detergent	apo	https://elifesciences.org/articles/47746	10.7554/eLife.47746	Zubcevic et al., 2019	2019-05-09	ADCB	A	D	C	B		4.1	OPM	TRPV	unk	L-peptide linking	400	442	462	480	506	520	542	546	566	586	608	651	673	708	42	18	14	4	20	43	35	400	708			586	673	442
6ot5	TRPV3	Homo sapiens	Q8NET8	cryo-EM	detergent	activator	https://elifesciences.org/articles/47746	10.7554/eLife.47746	Zubcevic et al., 2019	2019-05-09	ADCB	A	D	C	B		3.6	OPM	TRPV	fz4, unk	2-APB, L-peptide linking	400	442	462	480	506	520	542	546	566	578	608	650	677	709	42	18	14	4	12	42	32	400	709			578	677	442
6oo3	TRPV2	Oryctolagus cuniculus	G1SNM3	cryo-EM	amphipol	activator	https://elifesciences.org/articles/45779	10.7554/eLife.45779	Zubcevic et al., 2019	2019-05-15	ABCD	A	B	C	D		2.9	OPM	TRPV	6eu	resiniferatoxin	351	389	410	431	453	469	490	494	517	523	556	618	642	675	38	21	16	4	6	62	33	351	675			523	642	389
6oo4	TRPV2	Oryctolagus cuniculus	G1SNM3	cryo-EM	amphipol	activator	https://elifesciences.org/articles/45779	10.7554/eLife.45779	Zubcevic et al., 2019	2019-05-15	ABCD	A	B	C	D		3.3	OPM	TRPV	6eu	resiniferatoxin	351	389	410	431	453	469	490	494	517	523	556	618	642	673	38	21	16	4	6	62	31	351	673			523	642	389
6oo5	TRPV2	Oryctolagus cuniculus	G1SNM3	cryo-EM	amphipol	activator	https://elifesciences.org/articles/45779	10.7554/eLife.45779	Zubcevic et al., 2019	2019-05-15	ABCD	A	B	C	D		4.2	OPM	TRPV	6eu	resiniferatoxin	351	389	410	431	453	469	490	494	517	523	556	618	642	674	38	21	16	4	6	62	32	351	674			523	642	389
6oo7	TRPV2	Oryctolagus cuniculus	G1SNM3	cryo-EM	nanodisc	activator	https://elifesciences.org/articles/45779	10.7554/eLife.45779	Zubcevic et al., 2019	2019-05-15	ABCD	A	B	C	D		3.8	OPM	TRPV	6eu	resiniferatoxin	351	389	410	431	453	469	490	494	517	523	556	618	642	674	38	21	16	4	6	62	32	351	674			523	642	389
6u84	TRPV2	Rattus norvegicus	Q9WUD2	cryo-EM	nanodisc	apo	https://elifesciences.org/articles/48792	10.7554/eLife.48792	Pumroy et al., 2019	2019-09-30	ADCB	A	D	C	B		3.7	PDB, analyzed with OPM	TRPV	none	none	353	391	413	433	457	470	492	496	516	534	558	618	642	677	38	20	13	4	18	60	35	353	677			534	642	391
6u86	TRPV2	Rattus norvegicus	Q9WUD2	cryo-EM	nanodisc	apo	https://elifesciences.org/articles/48792	10.7554/eLife.48792	Pumroy et al., 2019	2019-09-30	ADCB	A	D	C	B		4	PDB, analyzed with OPM	TRPV	none	none	352	393	413	432	457	470	492	496	516	534	558	618	641	677	41	19	13	4	18	60	36	352	677			534	641	393
6u88	TRPV2	Rattus norvegicus	Q9WUD2	cryo-EM	nanodisc	activator	https://elifesciences.org/articles/48792	10.7554/eLife.48792	Pumroy et al., 2019	2019-09-30	ADCB	A	D	C	B		3.2	PDB, analyzed with OPM	TRPV	p0t	cannabidiol (CBD)	353	393	413	432	457	470	492	496	516	536	559	618	642	677	40	19	13	4	20	59	35	353	677			536	642	393
6u8a	TRPV2	Rattus norvegicus	Q9WUD2	cryo-EM	nanodisc	activator	https://elifesciences.org/articles/48792	10.7554/eLife.48792	Pumroy et al., 2019	2019-09-30	ADCB	A	D	C	B		3.4	PDB, analyzed with OPM	TRPV	p0t	cannabidiol (CBD)	352	391	413	432	457	470	492	496	516	534	559	618	642	677	39	19	13	4	18	59	35	352	677			534	642	391
6pvl	TRPV3	Mus musculus	Q8K424	cryo-EM	detergent	activator	https://www.nature.com/articles/s41594-019-0318-7	10.1038/s41594-019-0318-7	Singh et al., 2019	2019-10-20	ABCD	A	B	C	D		4.4	PDB, analyzed with OPM	TRPV	na	sodium	398	440	460	481	506	521	539	548	566	587	607	652	674	709	42	21	15	9	21	45	35	398	709			587	674	440
6pvm	TRPV3	Mus musculus	Q8K424	cryo-EM	detergent	activator	https://www.nature.com/articles/s41594-019-0318-7	10.1038/s41594-019-0318-7	Singh et al., 2019	2019-10-20	ABCD	A	B	C	D		4.5	PDB, analyzed with OPM	TRPV	na	sodium	400	441	461	482	506	520	541	546	566	578	608	652	677	709	41	21	14	5	12	44	32	400	709			578	677	441
6pvn	TRPV3	Mus musculus	Q8K424	cryo-EM	detergent	apo	https://www.nature.com/articles/s41594-019-0318-7	10.1038/s41594-019-0318-7	Singh et al., 2019	2019-10-20	ADCB	A	D	C	B		4.07	PDB, analyzed with OPM	TRPV	na	sodium	399	440	461	482	506	520	541	546	567	578	608	651	677	708	41	21	14	5	11	43	31	399	708			578	677	440
6pvp	TRPV3	Mus musculus	Q8K424	cryo-EM	detergent	activator	https://www.nature.com/articles/s41594-019-0318-7	10.1038/s41594-019-0318-7	Singh et al., 2019	2019-10-20	ABCD	A	B	C	D		4.48	PDB, analyzed with OPM	TRPV	na	sodium	398	442	462	481	505	520	542	546	566	582	608	650	678	709	44	19	15	4	16	42	31	398	709			582	678	442
[truncated: 1 more columns]

## Sheet: Not Used
PDB ID	Why exclude	Protein name	Species	UniProt ID	method	details	Enforce Chain Order (counterclockwise, from extracellular view)	Chain1	Chain2	Chain3	Chain4	Start	Stop	Resolution (A)	structure source	family	ligand PDB ID	ligand names	tm1_start	tm1_stop	tm2_start	tm2_stop	tm3_start	tm3_stop	tm4_start	tm4_stop	tm5_start	tm5_stop	tm6_start	tm6_stop
5wo6	not domain-swapped		Rattus norvegicus	Q9R186		TRPV6 channel, monomer, structure 3	ADCB							3.31	PDB biological assembly
5iwk	not domain-swapped		Rattus norvegicus	Q9R186	x-ray	TRPV6 channel, tetramer, structure 1	ADBC	A	D	B	C	267	607	3.25	OPM	TRPV	ca, dtb		328	348	382	407	424	443	449	468	488	511	552	573
5iwp	not domain-swapped	TRPV6	Rattus norvegicus	Q9R186	x-ray	TRPV6 (Ca)								3.65	OPM	TRPV	ca, dtb		328	348	382	407	424	443	449	468	448	511	552	573
5iwr	not domain-swapped	TRPV6	Rattus norvegicus	Q9R186	x-ray	TRPV6 (Ba)								3.85	OPM	TRPV	dtb, ba
5iwt	not domain-swapped	TRPV6	Rattus norvegicus	Q9R186	x-ray	TRPV6 (Gd)								3.8	OPM	TRPV	dtb, gd
6djr	resolution worse than 5A		?	?	cryo-EM	TRPC3								5.8	PDB	TRPC	unk
5ye2	resolution worse than 5A		Mus musculus	Q99J21	cryo-EM	TRPML1								5.8	PDB	TRPML	none
5ye5	resolution worse than 5A		Mus musculus	Q99J21	cryo-EM	TRPML1								5.8	PDB	TRPML	nag
5ydz	resolution worse than 5A		Mus musculus	Q99J21	cryo-EM	TRPML1								5.8	PDB	TRPML	none
5ye1	resolution worse than 5A		Mus musculus	Q99J21	cryo-EM	TRPML1								5.8	PDB	TRPML	none
6c8g	resolution worse than 5A		Xenopus tropicalis	F7BWY7	x-ray	TRPV4 channel (Ba)								6.31	PDB	TRPV	ba
6c8f	resolution worse than 5A		Xenopus tropicalis	F7BWY7	x-ray	TRPV4 channel (Cs)								6.5	PDB	TRPV	cs
6c8h	resolution worse than 5A		Xenopus tropicalis	F7BWY7	x-ray	TRPV4 channel (Gd)								6.5	PDB	TRPV	gd
5wo8	not domain-swapped	TRPV6	Rattus norvegicus	Q9R186	x-ray	TRPV6								3.4	PDB biological assembly	TRPV	ca, dtb		328	347	382	404	421	444	448	468	484	507	555	578
6pvq	no S5-S6	TRPV3	Mus musculus	Q8K424	cryo-EM		ABCD	A	B	C	D			4.75		TRPV	none	none	396	440	461	482	505	520	540	547	567
6pvo	resolution worse than 5A	TRPV3	Mus musculus	Q8K424	cryo-EM		ADCB	A	D	C	B			5.18		TRPV	none	none	399	441	461	482	506	520	541	546	566	586	608	651
