# Supplementary material for: Global alignment and assessment of TRP channel transmembrane domain structures to explore functional mechanisms
Source: eLife. 2020 Aug 17;9:e58660. doi: 10.7554/eLife.58660 (PMC7431192; doi:10.7554/eLife.58660)
Supplement: Figure 4—source data 1. [file elife-58660-fig4-data1.csv]

resolution	method	environment	subfamily	protein	ligand	pdbid	2086	2101	2103	2116	2150	2157	2158	2195	2198	2199	2202	2225	2228	2229	2231	2232	2233	2234	2235	2236	2242	2373	2374	2377	2378	2405	2432	2517	2521	2526	2527	2548	2549	2551	2552	2553	2555	2556	2557	2562	2563	2566	2567
2.4	x-ray	detergent	Kv	Kv 1.2/2.1 paddle chimera	apo	2r9r					-	-	-						0.68	0.69	0.69	0.83						-	-	-	-	-	-				4.6		5.07			4.23			-		-	-	-
3.28	cryo-EM	amphipol	TRPV	TRPV1	apo	3j5p	-				-	-	-						0.77	1.01								-	-	-	-	-	-			2.37					0.86			3.48			-	2.2	-
3.8	cryo-EM	amphipol	TRPV	TRPV1	activator	3j5q	-		-		-	-	-						2.22		3.15	2.22				-		-	-	-	-	-	-			1.54					3			4.64			-	3.55	-
4.2	cryo-EM	amphipol	TRPV	TRPV1	activator	3j5r	-				-	-	-															-	-	-	-	-	-														-		-
3.275	cryo-EM	amphipol	TRPV	TRPV1	apo	3j9j	-				-	-	-						0.96	1.67								-	-	-	-	-	-			2.37					1.01			3.21			-	2.13	-
4.24	cryo-EM	amphipol	TRPA	TRPA1	apo	3j9p	-				-	-	-						2.58	1.63		2.98			2.61					-	-	-	-								1.43			1.17			-		-
3.8	cryo-EM	amphipol	TRPV	TRPV2	apo	5an8	-				-	-	-						0.96	0.68					-			-	-	-	-	-	-				-				1.77			0.88			-	1.53	-
4.4	cryo-EM	detergent	TRPV	TRPV2	apo	5hi9	-		-	-	-	-	-							0.87					-			-	-	-	-	-	-				-							1.07			-	3.1	-
2.95	cryo-EM	nanodisc	TRPV	TRPV1	activator	5irx	-		-		-	-	-						2.47			4.43			-	-		-	-	-	-	-	-			2.3					2.77						-	3.88	-
3.28	cryo-EM	nanodisc	TRPV	TRPV1	apo	5irz	-				-	-	-						0.54	0.53								-	-	-	-	-	-			2.08					0.76			2.84			-	1.82	-
3.43	cryo-EM	nanodisc	TRPV	TRPV1	inhibitor	5is0	-				-	-	-						0.68	0.5								-	-	-	-	-	-			1.91					0.82			3.46			-	2.57	-
3.25	x-ray	detergent	TRPV	TRPV6 (not domain-swapped)	apo	5iwk	-	-	-	-	-	-	-	-	-			2.04			0.46					-	-		-	-	8.06			-	-	-	-		4.92			1.49			0.62		-	2.38	-
4.22	cryo-EM	detergent	TRPP	TRPP1	apo	5k47	-				-	-	-					0.75	0.43	2.39								-	-	-	-	-	-			1.96					0.74			0.91			-		-
4.3	cryo-EM	amphipol	TRPP	TRPP1	activator	5mke	-				-	-	-					1.56		2.14								-	-	-	-	-	-			3.32		3.34	2.67		1.9			0.75			-		-
4.2	cryo-EM	amphipol	TRPP	TRPP1	activator	5mkf	-				-	-	-					1.26	2.17	2.68								-	-	-	-	-	-			2.45					1.02			0.5			-		-
3	cryo-EM	nanodisc	TRPP	TRPP2	apo	5t4d	-				-	-	-					0.85	1.82									-	-	-	-	-	-			2.39			2.99		0.62			1.31			-	3.48	-
3.55	cryo-EM	nanodisc	TRPN	NOMPC	apo	5vkq					-	-	-					2.81	1.75			3.65								-		8.84				4.36					0.83			1.16			-	1.43	-
2.94	cryo-EM	amphipol	TRPML	TRPML3	apo	5w3s	-				-	-	-					2.36	2.3	2.19								-		-	-	-	-					3.88			0.96			1.95			-	3.33	-
3.72	cryo-EM	detergent	TRPML	TRPML1	apo	5wj5	-				-	-	-					0.78	0.7	1.92	2.29									-	-	-						2.34			0.94			0.88			-	1.94	-
3.49	cryo-EM	detergent	TRPML	TRPML1	activator	5wj9	-				-	-	-					1.71	0.8	0.64										-	-	-						3.58			2.35			3.06			-	3.76	-
3.25	x-ray	detergent	TRPV	TRPV6	apo	5wo7				7.93	-	-	-						2.41			0.71					7.84	-	-	-	-	-	-				-				0.83			0.65		3.2	-	4.71	-
3.9	x-ray	detergent	TRPV	TRPV6	apo	5wo9				7.23	-	-	-						1.98			0.34					7.2	-	-	-	-	-	-			-					0.95			0.81		2.92	-	4.49	-
3.9	x-ray	detergent	TRPV	TRPV6	apo	5woa				7.77	-	-	-						2.34			1.12						-	-	-	-	-	-				-				1.42			1.47			-	4.91	-
3.8	cryo-EM	detergent	TRPM	TRPM4	activator	5wp6	-				-	-	-						1.56	1.9				7.34						-						5.21					0.96			1.84			-		-
3.64	cryo-EM	nanodisc	TRPML	TRPML1	apo	5wpq	-				-	-	-					1.93	1.13	1.43										-	-	-	-					2.59			0.87			2.03			-	3.24	-
3.75	cryo-EM	nanodisc	TRPML	TRPML1	apo	5wpt	-				-	-	-					1.46	0.9	2.11										-	-	-	-					1.76			0.79			2.44			-	4.16	-
3.59	cryo-EM	nanodisc	TRPML	TRPML1	apo	5wpv	-				-	-	-					1.3	0.84	1.52										-	-	-	-								0.62			2.06			-	4.13	-
3.8	cryo-EM	nanodisc	TRPC	TRPC6	inhibitor	5yx9					-	-	-					3.41	2.45			4.31		4.64				-		-	-	-	-					2.99			1.47			0.79			-	0.98	-
3.38	cryo-EM	unknown	TRPP	TRPP2	apo	5z1w	-	-	-		-	-	-						1.95	3.93							-	-	-	-	-	-	-										2.96			2.56	-		-
4.36	cryo-EM	nanodisc	TRPC	TRPC3	apo	5zbg					-	-	-					2.76	1.97			3.84						-		-	-	-	-					3.03			1.78			0.81			-	1.18	-
3.28	cryo-EM	amphipol	TRPM	TRPM7	apo	5zx5	-	-			-	-	-						1.78	2.2				3.69						-		5.16				1.41					0.99			0.42			-		-
2.89	cryo-EM	detergent	TRPC	TRPC5	apo	6aei					4.83	-	-						1.69			2.78						-		-	-	-	-					3.29			0.94			0.93			-	0.88	-
4.06	cryo-EM	amphipol	TRPML	TRPML3	apo	6aye	-				-	-	-					1.97	1.02	1.1	2.09							-		-	-	-	-					3.7			0.8			2.05			-	2.23	-
3.62	cryo-EM	amphipol	TRPML	TRPML3	activator	6ayf	-				-	-	-						1.41	1.56	2.97							-		-	-	-	-								3.34			3.87			-	2.46	-
4.65	cryo-EM	detergent	TRPML	TRPML3	inhibitor	6ayg	-				-	-	-					1.95	1.75	0.96									-	-	-	-	-					3.56			2.17			2.78			-	2.03	-
4.8	cryo-EM	detergent	TRPV	TRPV5	inhibitor	6b5v					-	-	-						2.28	2.81		1.31				-			-	-	-	-	-			-		3.94	3.01		1.12			0.8			-	0.52	-
3.8	cryo-EM	detergent	TRPV	TRPV4	apo	6bbj		-			-	-	-				-	-	-	4.63	3.62		-			-	-			-					4.86		-		2.23			0.81		2.82	3.45		-		-
3.14	cryo-EM	nanodisc	TRPM	TRPM4	apo	6bcj	-				-	-	-						2.15					6.16						-								4.78			0.87			1.62			-	3.99	-
3.54	cryo-EM	nanodisc	TRPM	TRPM4	apo	6bcl	-				-	-	-						2.12	2.47				5.51						-								4.84			0.82			1.58			-	4.02	-
2.88	cryo-EM	nanodisc	TRPM	TRPM4	inhibitor	6bco	-				-	-	-						2.27					6.32						-								4.71			0.86			1.63			-	4.14	-
3.25	cryo-EM	nanodisc	TRPM	TRPM4	inhibitor	6bcq	-				-	-	-						2.15					6.16					7.61	-								4.6			0.87			1.46			-	4.17	-
4	cryo-EM	detergent	TRPV	TRPV2	apo	6bo4		-			-	-	-						3.39	2.86		2.76		-		-	-	-	-	-	-	-	-			4.49					3.5			2.88			-	2.94	-
3.6	cryo-EM	detergent	TRPV	TRPV2	apo	6bo5	-	-	-	-	-	-	-							1.49		1.68	-					-	-	-	-	-	-			2.9		3.89			2.81						-	5.03	-
3.6	cryo-EM	nanodisc	TRPV	TRPV6	apo	6bo8					-	-	-						3.2							-		-	-	-	-	-	-								2.93			4.95			-	3.48	-
4	cryo-EM	amphipol	TRPV	TRPV6	apo	6bo9				8.21	-	-	-					2.65			0.85				7.64	-		-	-	-	-	-	-								3.06			5.1			-	4.31	-
4.2	cryo-EM	amphipol	TRPV	TRPV6	apo	6boa				7.83	-	-	-						2.57	2.69		1.38				7.76		-	-	-	-	-	-			-		3.95			1.17			0.76			-		-
3.9	cryo-EM	nanodisc	TRPV	TRPV6	apo	6bob					-	-	-					2.55								-		-	-	-	-	-	-				-				1.2			0.79			-	0.9	-
4.1	cryo-EM	detergent	TRPM	TRPM8	apo	6bpq	-	-		-	-	-	-			9.09	-	-	-	8.76	-	-	-	-	-	-	-	-	-	-	-	-	-			-				4.26			0.76	1.64	-		-	-	-
3.2	cryo-EM	nanodisc	TRPM	TRPM4	apo	6bqr	-				-	-	-						1.74	2.61										-											0.75			1.22			-		-
3.1	cryo-EM	nanodisc	TRPM	TRPM4	activator	6bqv	-				-	-	-						1.68					5.36						-						4.3					0.73			1.36			-		-
4.1	cryo-EM	amphipol	TRPM	TRPM7	apo	6bwf	-	-			-	-	-					2.18	1.41	1.47										-			4.23								1.09			0.33			-	4.08	-
3.7	cryo-EM	unknown	TRPM	TRPM4	apo	6bwi	-				-	-	-						1.41										8.06	-											0.72			0.85			-		-
3.07	cryo-EM	detergent	TRPM	TRPM2	activator	6co7					-	-	-					2.57	2.61	3.41								4.64		-						4.91					0.87			1.24			-	2.11	-
3.3	cryo-EM	detergent	TRPC	TRPC3	activator	6cud					-	-	-						1.96			4.12						-		-	-	-	-				-	4.63			1.38			0.69			-	3.61	-
3.54	cryo-EM	amphipol	TRPP	TRPP1	apo	6d1w	-				-	-	-					0.96	1.97	3.42								-	-	-	-	-	-			3.81	-				2.66			2.31		-	-	-	-
3.45	x-ray	detergent	TRPV	TRPV6	inhibitor	6d7o				7.59	-	-	-						2.34			0.32					7.31	-	-	-	-	-	-			-					1.17			0.84		3.17	-	4.49	-
3.37	x-ray	detergent	TRPV	TRPV6	apo	6d7p				6.59	-	-	-						2.41			0.32						-	-	-	-	-	-			-					1.12			0.89			-	4	-
3.5	x-ray	detergent	TRPV	TRPV6	inhibitor	6d7q				6.97	-	-	-						2.2			0.16						-	-	-	-	-	-				-				1.2			0.74		2.7	-	3.91	-
4.34	cryo-EM	amphipol	TRPV	TRPV6	apo	6d7s				7.59	-	-	-						1.8			0.37						-	-	-	-	-	-					4.32			2.69			4.32			-	3.09	-
4.44	cryo-EM	amphipol	TRPV	TRPV6	activator	6d7t				6.62	-	-	-						1.82			0.44						-	-	-	-	-	-			-		3.8			0.74			0.79			-	2.26	-
4.3	x-ray	detergent	TRPV	TRPV6	inhibitor	6d7v				7.27	-	-	-						1.81	2.17		1.82					7.63	-	-	-	-	-	-			-					1.25			1.1		2.9	-	4.07	4.99
3.6	x-ray	detergent	TRPV	TRPV6	inhibitor	6d7x				7.57	-	-	-						1.92			0.34					7.64	-	-	-	-	-	-			-					1.35			1.18			-	3.43	-
3.9	cryo-EM	detergent	TRPV	TRPV5	apo	6dmr					-	-	-						2.67			0.37				7.48		-	-	-	-	-	-								1.88			3.84			-	1.97	-
3.9	cryo-EM	nanodisc	TRPV	TRPV5	activator	6dmu					-	-	-						2.79	3.1		1.41				8.45		-	-	-	-	-	-						3.71		3.28			5.41			-	4.52	-
3.9	cryo-EM	detergent	TRPV	TRPV5	inhibitor	6dmw					-	-	-						2.67			0.05						-	-	-	-	-	-											3.59			-		-
3.3	cryo-EM	detergent	TRPM	TRPM2	activator	6drj		-			-	-	-						3.65			3.74								-											5.58			4.42			-	5.77	-
3.8	cryo-EM	detergent	TRPM	TRPM2	apo	6drk		-			-	-	-				-	-	3.21			3.45								-											3.86			1.23			-	1.04	-
3.11	cryo-EM	amphipol	TRPP	TRPP2	apo	6du8	-				-	-	-					2.62	2.79	4.33								-	-	-	-	-	-			5.59	-				1.38			-	0.55	-	-	-	-
4.3	cryo-EM	detergent	TRPV	TRPV3	apo	6dvw					-	-	-					3.39		2.09	3.41		-			-		-	-	-	-	-	-			3.97	-				1.91			0.87			-	1.85	-
4	cryo-EM	detergent	TRPV	TRPV3	activator	6dvy					-	-	-						1.48		3.23			5.56				-	-	-	-	-	-				-	3.68			1.21			0.86			0.82		-
4	cryo-EM	detergent	TRPV	TRPV3	activator	6dvz	12.87				-	-	-					3.45	1.89		3.92	3.44			-			-	-	-	-	-	-			3.48			2.68		2.42						-	2.69	-
3.9	cryo-EM	amphipol	TRPV	TRPV6	inhibitor	6e2f				8.3	-	-	-						2.3			0.74				8.15		-	-	-	-	-	-								1.33			3.33			-		-
3.6	cryo-EM	amphipol	TRPV	TRPV6	inhibitor	6e2g					-	-	-						2.34			0.54				8.01		-	-	-	-	-	-								1.24			3.2			-		-
3.5	cryo-EM	detergent	TRPML	TRPML1	activator	6e7p	-				-	-	-					1.67	0.7	1.4	2.81									-	-	-						2.75			0.83			1.58			-	2.76	-
3.5	cryo-EM	detergent	TRPML	TRPML1	inhibitor	6e7y	-				-	-	-					1.83	0.51	1.4										-	-	-						3.25			0.8			1.77			-	2.7	-
3.5	cryo-EM	detergent	TRPML	TRPML1	activator	6e7z	-				-	-	-					1.82	0.91	0.98										-	-	-						4.43			2.45			2.83			-	4.08	-
3.6	cryo-EM	amphipol	TRPC	TRPC4	apo	6g1k					-	5.02	4.3						1.84			3.8		5.01				-		-	-	-	-			4.5		3.13			0.8			0.35			-	2.66	-
3.4	cryo-EM	amphipol	TRPV	TRPV3	apo	6mho	-				-	-	-					2.24	1.58			4.08			-			-	-	-	-	-	-				-	4.76			2.01			0.55			-	3.3	-
3.2	cryo-EM	amphipol	TRPV	TRPV3	activator	6mhs				10.64	-	-	-					1.95	1.69						-	-		-	-	-	-	-	-			4.2					1.19			3.11			-	4.11	-
3.5	cryo-EM	amphipol	TRPV	TRPV3	activator	6mhv				10.4	-	-	-					2	1.03						-			-	-	-	-	-	-				-	4.35			1.74			0.61			-	2.75	-
3.5	cryo-EM	amphipol	TRPV	TRPV3	activator	6mhw					-	-	-					2.21		2.69		3.93			-	-		-	-	-	-	-	-				-				1.78			1.55			-	1.64	-
3.5	cryo-EM	amphipol	TRPV	TRPV3	activator	6mhx					-	-	-												-	-		-	-	-	-	-	-				-				1.8						-		-
3.6	cryo-EM	detergent	TRPM	TRPM2	apo	6mix	-				-	-	-					2.48	2.34	3.33				4.98			-	-	-	-	-	-	-					2.19			0.92			1.68			-	1.36	-
4	cryo-EM	detergent	TRPM	TRPM8	activator	6nr2	-	-			-	-	-				-	-	-	6.67		5.67	-	-	-	-	-	-	-	-	-	-	-				-				1.35	1.37				-	-	-	-
3.4	cryo-EM	detergent	TRPM	TRPM8	activator	6nr3	-	-	-		-	-	-		-		-	-	-	6.04	-	6.2	-	-	-	-	-	-	-	-	-	-	-				-				2.51			1.9		-	-	-	-
4.3	cryo-EM	detergent	TRPM	TRPM8	activator	6nr4	-	-			-	-	-		-	6.91	-	-	-		-	-	-	-	-	-	-	-	-	-	-	-	-				-		3.6		1.19		2.87	-		-	-	-	-
2.9	cryo-EM	nanodisc	TRPV	TRPV5	apo	6o1n					-	-	-									0.77				8.1		-	-	-	-	-	-														-		-
3	cryo-EM	nanodisc	TRPV	TRPV5	apo	6o1p					-	-	-						1.97			0.63						-	-	-	-	-	-								1.09			2.42			-	2.46	-
2.8	cryo-EM	nanodisc	TRPV	TRPV5	apo	6o1u					-	-	-						2.39			0.48				7.89		-	-	-	-	-	-								2.35			4.46	4.11		-		-
3.3	cryo-EM	detergent	TRPV	TRPV5	inhibitor	6o20					-	-	-						1.47			0.37				7.72		-	-	-	-	-	-								0.83			2.84			-		-
4.1	cryo-EM	amphipol	TRPM	TRPM8	apo	6o6a	-				-	-	-				-	-	-	-	-	8	-	-	-	-	-	-	-	-	-	-	-	8.81							0.7	0.91				-	-		-
3.2	cryo-EM	amphipol	TRPM	TRPM8	inhibitor	6o6r	-				-	-	-				-	-	-	6.04		-	-	-	-	-	-	-	-	-	-	-	-								1.36	0.65		3.09		-	-		-
3	cryo-EM	amphipol	TRPM	TRPM8	inhibitor	6o72	-	-	-		-	-	-				-	-	-	6.3	-	6.34	-	-	-	-	-	-	-	-	-	-	-								1.51	0.63		3.13		-	-	-	-
3.2	cryo-EM	amphipol	TRPM	TRPM8	activator	6o77	-	-	-		-	-	-					2.76	3.59		3.75		4.94							8.46	8.49					4.2			2.64		0.78			2.78			-	4.18	-
2.9	cryo-EM	amphipol	TRPV	TRPV2	activator	6oo3	-				-	-	-						1.12	1.22					-			-	-	-	-	-	-				-	6.07			1.52			0.75			-	2.37	-
3.3	cryo-EM	amphipol	TRPV	TRPV2	activator	6oo4	-				-	-	-						0.75	1.32					-			-	-	-	-	-	-				-				1.4						-		-
4.2	cryo-EM	amphipol	TRPV	TRPV2	activator	6oo5	-				-	-	-							1.89					-	-		-	-	-	-	-	-				-				1.49						-	2.89	-
4.1	cryo-EM	detergent	TRPV	TRPV3	apo	6ot2					-	-	-					2.72	1.19	2.37					-			-	-	-	-	-	-				-	5.01			2.23			1.78			-	4.05	-
3.6	cryo-EM	detergent	TRPV	TRPV3	activator	6ot5					-	-	-					1.96	1.34					-	-			-	-	-	-	-	-			2.94					1.46			3.4			-	4.35	-
4.3	cryo-EM	detergent	TRPM	TRPM2	apo	6pkv		-		-	-	-	-	12.78	10.44	-	-	-	-	-	-	-	-	-	-	-	-	-	-	-	-	-	-				-				4.11			2.7		-	-	-	-
4.4	cryo-EM	detergent	TRPV	TRPV3	activator	6pvl					-	-	-					2.7	-	3.01	3.18			6.63		-		-	-	-	-	-	-			3.94	-		4.56		2.15			0.84		2.13	-		-
4.5	cryo-EM	detergent	TRPV	TRPV3	activator	6pvm		7.25			-	-	-						0.68	1.87				-		-		-	-	-	-	-	-			2.93			2.95		1.25			2.78			-	4.2	-
4.07	cryo-EM	detergent	TRPV	TRPV3	apo	6pvn					-	-	-				3.81		1.24		1.62				-			-	-	-	-	-	-			3.49					0.78			3.1			-	3.36	-
4.48	cryo-EM	detergent	TRPV	TRPV3	activator	6pvp					-	-	-						1.54	1.81		3.17			-			-	-	-	-	-	-			2.56			3.37		3			4.55			-	4.15	-
3.7	cryo-EM	nanodisc	TRPV	TRPV2	apo	6u84					-	-	-						0.23	0.62					-			-	-	-	-	-	-				-				2.39			0.29			-	1.81	-
4	cryo-EM	nanodisc	TRPV	TRPV2	apo	6u86	-	-			-	-	-						4.34			1.98		-				-	-	-	-	-	-			4.65	-				2.48			1.23			-	1.19	-
3.2	cryo-EM	nanodisc	TRPV	TRPV2	activator	6u88	-				-	-	-						0.51	0.72					-			-	-	-	-	-	-			4.93	-				1.57			0.81			-	1.5	-
3.4	cryo-EM	nanodisc	TRPV	TRPV2	activator	6u8a	-		9.12		-	-	-						0.58	0.75					-			-	-	-	-	-	-			4.79	-				2.02			0.51			-	1.57	-
[truncated: 13 more columns]
