# Supplementary material for: Global alignment and assessment of TRP channel transmembrane domain structures to explore functional mechanisms
Source: eLife. 2020 Aug 17;9:e58660. doi: 10.7554/eLife.58660 (PMC7431192; doi:10.7554/eLife.58660)
Supplement: Figure 6—source data 1. [file elife-58660-fig6-data1.csv]

PDB	RTx	DkTx	cooling	Ca2+	PIP2	2-APB (V3, site 1)	2-APB (V3, site 2)	2-APB (V3, site 3)	2-APB (V6, site 2)	CBD	ML-SA1
3rqw	0	14.28571429	0	0	10	0	0	0	0	0	9.090909091
5svl	0	7.142857143	0	0	10	0	0	0	0	0	0
3j9p	36.84210526	14.28571429	16.66666667	20	20	0	16.66666667	0	14.28571429	25	9.090909091
6bo4	68.42105263	21.42857143	16.66666667	20	10	20	33.33333333	33.33333333	42.85714286	66.66666667	18.18181818
6d7v	47.36842105	21.42857143	8.333333333	0	30	20	0	16.66666667	100	41.66666667	27.27272727
6d7q	42.10526316	21.42857143	8.333333333	0	20	20	0	16.66666667	85.71428571	41.66666667	27.27272727
6d7x	42.10526316	21.42857143	8.333333333	0	20	20	0	16.66666667	85.71428571	41.66666667	27.27272727
6bob	47.36842105	21.42857143	8.333333333	0	30	20	0	16.66666667	100	41.66666667	27.27272727
6boa	47.36842105	21.42857143	8.333333333	0	30	20	0	16.66666667	85.71428571	41.66666667	27.27272727
6d7s	47.36842105	21.42857143	8.333333333	0	30	20	0	16.66666667	85.71428571	41.66666667	27.27272727
6bo8	52.63157895	21.42857143	8.333333333	0	30	20	0	16.66666667	100	41.66666667	27.27272727
6bo9	52.63157895	21.42857143	8.333333333	0	30	20	0	16.66666667	100	41.66666667	27.27272727
6d7o	47.36842105	21.42857143	8.333333333	0	40	20	0	16.66666667	100	41.66666667	27.27272727
5wo9	47.36842105	21.42857143	8.333333333	0	30	20	0	16.66666667	100	41.66666667	27.27272727
5wo7	47.36842105	21.42857143	8.333333333	0	30	20	0	16.66666667	100	41.66666667	27.27272727
5woa	47.36842105	21.42857143	8.333333333	0	30	20	0	16.66666667	100	41.66666667	27.27272727
6dmu	42.10526316	21.42857143	8.333333333	0	20	20	0	33.33333333	85.71428571	41.66666667	36.36363636
6d7t	47.36842105	21.42857143	8.333333333	0	30	20	0	16.66666667	85.71428571	41.66666667	27.27272727
6d7p	42.10526316	21.42857143	8.333333333	0	20	20	0	16.66666667	85.71428571	41.66666667	27.27272727
6dmr	42.10526316	21.42857143	8.333333333	0	30	20	0	33.33333333	85.71428571	41.66666667	36.36363636
6dmw	42.10526316	21.42857143	8.333333333	0	30	20	0	33.33333333	85.71428571	41.66666667	36.36363636
6o1u	42.10526316	21.42857143	8.333333333	0	20	20	0	33.33333333	85.71428571	41.66666667	36.36363636
6o1p	42.10526316	21.42857143	8.333333333	0	20	20	0	33.33333333	85.71428571	41.66666667	36.36363636
6o20	42.10526316	21.42857143	8.333333333	0	20	20	0	33.33333333	85.71428571	41.66666667	36.36363636
6o1n	42.10526316	21.42857143	8.333333333	0	20	20	0	33.33333333	85.71428571	41.66666667	36.36363636
6e2f	52.63157895	21.42857143	8.333333333	0	20	20	0	16.66666667	100	41.66666667	27.27272727
6e2g	47.36842105	21.42857143	8.333333333	0	30	20	0	16.66666667	100	41.66666667	27.27272727
6pvl	57.89473684	21.42857143	8.333333333	0	20	100	50	66.66666667	71.42857143	75	9.090909091
6dvw	57.89473684	21.42857143	8.333333333	0	30	100	50	50	71.42857143	75	9.090909091
6dvy	57.89473684	14.28571429	8.333333333	0	30	100	50	66.66666667	71.42857143	75	9.090909091
6dvz	52.63157895	21.42857143	8.333333333	0	30	100	100	100	42.85714286	50	9.090909091
6pvp	52.63157895	21.42857143	8.333333333	0	20	100	100	100	42.85714286	50	9.090909091
6pvm	57.89473684	14.28571429	8.333333333	0	20	100	50	50	71.42857143	50	9.090909091
6pvn	52.63157895	21.42857143	8.333333333	0	20	100	50	83.33333333	57.14285714	50	9.090909091
6bo5	73.68421053	14.28571429	16.66666667	20	10	20	33.33333333	33.33333333	42.85714286	75	9.090909091
3j9j	100	85.71428571	16.66666667	0	20	20	33.33333333	33.33333333	42.85714286	58.33333333	9.090909091
6ot5	52.63157895	21.42857143	8.333333333	0	20	100	50	66.66666667	71.42857143	41.66666667	9.090909091
6ot2	57.89473684	21.42857143	8.333333333	0	20	100	50	66.66666667	71.42857143	75	9.090909091
6mhs	57.89473684	28.57142857	8.333333333	0	30	100	50	66.66666667	71.42857143	50	9.090909091
6mhw	57.89473684	28.57142857	16.66666667	20	30	100	50	66.66666667	57.14285714	75	9.090909091
6mhx	57.89473684	28.57142857	8.333333333	0	30	100	50	50	71.42857143	75	9.090909091
6mhv	57.89473684	28.57142857	8.333333333	0	30	100	50	66.66666667	71.42857143	75	9.090909091
6mho	57.89473684	28.57142857	8.333333333	0	30	100	50	66.66666667	71.42857143	75	9.090909091
6oo3	94.73684211	21.42857143	16.66666667	20	10	20	33.33333333	33.33333333	42.85714286	100	18.18181818
6u88	73.68421053	21.42857143	25	0	10	20	33.33333333	33.33333333	42.85714286	100	18.18181818
6oo5	94.73684211	28.57142857	25	0	10	20	33.33333333	33.33333333	42.85714286	100	18.18181818
6oo4	89.47368421	21.42857143	25	0	10	20	33.33333333	33.33333333	42.85714286	91.66666667	18.18181818
6oo7	94.73684211	28.57142857	25	0	10	20	33.33333333	33.33333333	42.85714286	100	18.18181818
6bwm	68.42105263	21.42857143	25	0	20	20	33.33333333	33.33333333	42.85714286	91.66666667	18.18181818
6b5v	42.10526316	14.28571429	8.333333333	0	20	20	0	33.33333333	85.71428571	41.66666667	27.27272727
3j5r	100	85.71428571	16.66666667	0	30	20	33.33333333	33.33333333	42.85714286	58.33333333	9.090909091
3j5p	94.73684211	85.71428571	16.66666667	0	30	20	33.33333333	33.33333333	42.85714286	50	9.090909091
5irz	100	85.71428571	16.66666667	0	30	20	33.33333333	33.33333333	42.85714286	58.33333333	9.090909091
5is0	100	85.71428571	16.66666667	0	30	20	33.33333333	33.33333333	42.85714286	58.33333333	9.090909091
5irx	100	100	16.66666667	0	30	0	33.33333333	33.33333333	42.85714286	58.33333333	9.090909091
3j5q	100	85.71428571	16.66666667	0	30	0	33.33333333	33.33333333	42.85714286	58.33333333	9.090909091
6u86	68.42105263	35.71428571	25	0	10	20	33.33333333	33.33333333	42.85714286	91.66666667	18.18181818
6u84	63.15789474	21.42857143	25	0	10	20	33.33333333	33.33333333	42.85714286	91.66666667	18.18181818
6u8a	68.42105263	21.42857143	25	0	10	20	33.33333333	33.33333333	42.85714286	91.66666667	18.18181818
6bwj	84.21052632	28.57142857	25	0	20	20	33.33333333	33.33333333	42.85714286	91.66666667	18.18181818
5hi9	63.15789474	14.28571429	25	0	20	20	33.33333333	33.33333333	42.85714286	91.66666667	9.090909091
5an8	63.15789474	14.28571429	25	0	20	20	33.33333333	33.33333333	42.85714286	91.66666667	18.18181818
2r9r	21.05263158	21.42857143	25	40	0	0	16.66666667	16.66666667	0	8.333333333	0
5z1w	0	21.42857143	8.333333333	0	10	0	16.66666667	0	14.28571429	16.66666667	18.18181818
6du8	10.52631579	7.142857143	25	60	10	0	33.33333333	0	0	33.33333333	18.18181818
6ayf	10.52631579	14.28571429	0	0	0	0	16.66666667	16.66666667	14.28571429	25	90.90909091
5w3s	10.52631579	14.28571429	0	0	0	0	16.66666667	16.66666667	14.28571429	25	90.90909091
6aye	10.52631579	14.28571429	0	0	0	0	16.66666667	16.66666667	14.28571429	25	90.90909091
5wj5	15.78947368	7.142857143	0	0	10	0	16.66666667	16.66666667	0	25	100
5wj9	15.78947368	7.142857143	0	0	0	0	16.66666667	16.66666667	0	25	100
6e7z	15.78947368	7.142857143	0	0	0	0	16.66666667	16.66666667	0	25	100
6e7p	15.78947368	7.142857143	0	0	0	0	16.66666667	16.66666667	0	25	100
6e7y	15.78947368	7.142857143	0	0	0	0	16.66666667	16.66666667	0	25	100
5wpt	15.78947368	7.142857143	0	0	0	0	16.66666667	16.66666667	0	25	100
5wpv	15.78947368	7.142857143	0	0	0	0	16.66666667	16.66666667	0	25	100
5wpq	15.78947368	7.142857143	0	0	0	0	16.66666667	16.66666667	0	25	100
6ayg	10.52631579	14.28571429	0	0	10	0	16.66666667	16.66666667	0	25	90.90909091
6a70	10.52631579	21.42857143	0	0	10	0	16.66666667	0	0	16.66666667	0
5k47	10.52631579	14.28571429	8.333333333	40	20	0	0	0	14.28571429	33.33333333	27.27272727
5mke	10.52631579	7.142857143	8.333333333	40	20	0	0	0	14.28571429	33.33333333	27.27272727
5mkf	10.52631579	14.28571429	8.333333333	40	20	0	0	0	14.28571429	33.33333333	27.27272727
5t4d	5.263157895	14.28571429	0	0	20	0	0	0	28.57142857	33.33333333	27.27272727
6d1w	10.52631579	14.28571429	8.333333333	40	20	0	0	0	14.28571429	50	18.18181818
5iwk	15.78947368	7.142857143	8.333333333	0	20	20	0	16.66666667	100	8.333333333	0
6bbj	26.31578947	0	0	0	20	20	16.66666667	0	42.85714286	8.333333333	9.090909091
6drj	15.78947368	7.142857143	83.33333333	100	40	0	0	33.33333333	0	16.66666667	0
6drk	15.78947368	7.142857143	83.33333333	100	50	0	0	33.33333333	0	33.33333333	0
6d73	15.78947368	14.28571429	83.33333333	100	40	0	0	33.33333333	0	41.66666667	9.090909091
6pkx	5.263157895	14.28571429	58.33333333	20	40	0	0	33.33333333	14.28571429	41.66666667	9.090909091
6co7	15.78947368	7.142857143	75	100	40	0	0	33.33333333	0	25	9.090909091
5vkq	26.31578947	7.142857143	16.66666667	20	10	0	0	16.66666667	0	50	18.18181818
6nr3	10.52631579	14.28571429	100	100	100	0	0	16.66666667	0	33.33333333	9.090909091
6nr2	5.263157895	7.142857143	91.66666667	100	90	0	0	16.66666667	0	41.66666667	9.090909091
6nr4	5.263157895	7.142857143	91.66666667	100	90	0	0	16.66666667	0	41.66666667	9.090909091
6bpq	5.263157895	0	91.66666667	100	90	0	0	16.66666667	0	16.66666667	9.090909091
6o72	5.263157895	7.142857143	91.66666667	100	90	0	0	16.66666667	0	41.66666667	18.18181818
6o6a	5.263157895	7.142857143	91.66666667	100	90	0	0	16.66666667	0	41.66666667	18.18181818
6o6r	5.263157895	7.142857143	91.66666667	100	90	0	0	16.66666667	0	41.66666667	18.18181818
6pw4	10.52631579	7.142857143	33.33333333	80	20	20	0	16.66666667	14.28571429	16.66666667	18.18181818
6o77	5.263157895	21.42857143	91.66666667	100	100	0	0	16.66666667	0	25	9.090909091
5wp6	5.263157895	0	83.33333333	100	30	0	0	33.33333333	0	25	9.090909091
6bco	5.263157895	0	83.33333333	100	30	0	0	33.33333333	0	33.33333333	9.090909091
6bcj	5.263157895	0	83.33333333	100	30	0	0	33.33333333	0	33.33333333	9.090909091
6bcq	5.263157895	0	83.33333333	100	30	0	0	33.33333333	0	33.33333333	9.090909091
6bcl	5.263157895	0	83.33333333	100	30	0	0	33.33333333	0	33.33333333	9.090909091
6bqr	5.263157895	0	83.33333333	100	30	0	0	33.33333333	0	25	9.090909091
6bqv	5.263157895	0	83.33333333	100	30	0	0	33.33333333	0	25	9.090909091
6pkv	15.78947368	7.142857143	83.33333333	100	50	0	0	33.33333333	0	41.66666667	0
6pkw	15.78947368	7.142857143	83.33333333	100	50	0	0	33.33333333	0	33.33333333	9.090909091
5zx5	21.05263158	0	50	60	40	0	0	16.66666667	14.28571429	8.333333333	18.18181818
6bwd	21.05263158	0	50	60	30	0	0	16.66666667	14.28571429	8.333333333	18.18181818
6bwf	21.05263158	0	50	60	40	0	0	16.66666667	14.28571429	8.333333333	18.18181818
6mix	10.52631579	0	91.66666667	100	40	0	0	33.33333333	0	33.33333333	18.18181818
6bwi	5.263157895	0	83.33333333	100	30	0	0	33.33333333	0	25	9.090909091
5z96	5.263157895	7.142857143	41.66666667	100	40	0	0	0	0	50	18.18181818
6aei	5.263157895	7.142857143	41.66666667	80	40	0	0	0	14.28571429	50	9.090909091
6g1k	5.263157895	7.142857143	41.66666667	100	50	0	0	0	0	50	18.18181818
5zbg	15.78947368	0	41.66666667	80	50	0	0	0	28.57142857	33.33333333	18.18181818
5yx9	15.78947368	7.142857143	41.66666667	80	50	0	0	0	28.57142857	33.33333333	18.18181818
6cud	15.78947368	0	41.66666667	80	50	0	0	16.66666667	28.57142857	50	18.18181818
6pw5	15.78947368	7.142857143	33.33333333	80	20	20	0	16.66666667	14.28571429	25	18.18181818
