# Supplementary material for: Global alignment and assessment of TRP channel transmembrane domain structures to explore functional mechanisms
Source: eLife. 2020 Aug 17;9:e58660. doi: 10.7554/eLife.58660 (PMC7431192; doi:10.7554/eLife.58660)
Supplement: Figure 6—source data 2. [file elife-58660-fig6-data2.csv]

PDB	RTx	DkTx	cooling	Ca2+	PIP2	2-APB (V3, site 1)	2-APB (V3, site 2)	2-APB (V3, site 3)	2-APB (V6, site 2)	CBD	ML-SA1
3rqw	0	14.28571429	0	0	0	0	0	0	0	8.333333333	9.090909091
5svl	0	0	0	0	0	0	0	0	0	0	0
3j9p	63.15789474	28.57142857	41.66666667	40	20	20	33.33333333	16.66666667	42.85714286	66.66666667	18.18181818
6bo4	84.21052632	50	25	20	30	60	66.66666667	50	57.14285714	91.66666667	18.18181818
6d7v	73.68421053	21.42857143	16.66666667	40	40	20	33.33333333	33.33333333	100	75	36.36363636
6d7q	68.42105263	21.42857143	8.333333333	40	30	20	33.33333333	33.33333333	85.71428571	75	36.36363636
6d7x	68.42105263	21.42857143	8.333333333	40	30	20	33.33333333	33.33333333	85.71428571	75	36.36363636
6bob	73.68421053	21.42857143	16.66666667	40	30	20	33.33333333	33.33333333	100	75	36.36363636
6boa	68.42105263	21.42857143	16.66666667	40	30	20	33.33333333	33.33333333	85.71428571	75	36.36363636
6d7s	68.42105263	21.42857143	8.333333333	40	30	20	33.33333333	33.33333333	85.71428571	66.66666667	36.36363636
6bo8	73.68421053	21.42857143	16.66666667	40	30	20	33.33333333	33.33333333	100	66.66666667	36.36363636
6bo9	73.68421053	21.42857143	16.66666667	40	30	20	33.33333333	33.33333333	100	66.66666667	36.36363636
6d7o	73.68421053	21.42857143	16.66666667	40	40	20	33.33333333	33.33333333	100	75	36.36363636
5wo9	73.68421053	21.42857143	16.66666667	40	30	20	33.33333333	33.33333333	100	75	36.36363636
5wo7	73.68421053	21.42857143	16.66666667	40	30	20	33.33333333	33.33333333	100	75	36.36363636
5woa	73.68421053	21.42857143	16.66666667	40	30	20	33.33333333	33.33333333	100	75	36.36363636
6dmu	73.68421053	28.57142857	16.66666667	40	30	20	33.33333333	33.33333333	100	58.33333333	45.45454545
6d7t	68.42105263	21.42857143	8.333333333	40	40	20	33.33333333	33.33333333	85.71428571	75	36.36363636
6d7p	68.42105263	21.42857143	8.333333333	40	30	20	33.33333333	33.33333333	85.71428571	75	36.36363636
6dmr	73.68421053	28.57142857	16.66666667	40	30	20	33.33333333	33.33333333	100	58.33333333	45.45454545
6dmw	73.68421053	28.57142857	16.66666667	40	30	20	33.33333333	33.33333333	100	58.33333333	45.45454545
6o1u	73.68421053	28.57142857	16.66666667	40	30	20	33.33333333	33.33333333	100	58.33333333	45.45454545
6o1p	73.68421053	28.57142857	16.66666667	40	40	20	33.33333333	33.33333333	100	58.33333333	45.45454545
6o20	73.68421053	28.57142857	16.66666667	40	40	20	33.33333333	33.33333333	100	58.33333333	45.45454545
6o1n	73.68421053	28.57142857	16.66666667	40	30	20	33.33333333	33.33333333	100	58.33333333	45.45454545
6e2f	73.68421053	21.42857143	16.66666667	40	30	20	33.33333333	33.33333333	100	66.66666667	36.36363636
6e2g	73.68421053	21.42857143	16.66666667	40	40	20	33.33333333	50	100	66.66666667	36.36363636
6pvl	78.94736842	42.85714286	33.33333333	40	30	100	66.66666667	66.66666667	71.42857143	100	9.090909091
6dvw	78.94736842	42.85714286	33.33333333	40	30	100	66.66666667	50	71.42857143	100	9.090909091
6dvy	78.94736842	35.71428571	33.33333333	40	30	100	66.66666667	66.66666667	71.42857143	100	9.090909091
6dvz	73.68421053	35.71428571	25	40	30	100	100	100	57.14285714	91.66666667	9.090909091
6pvp	73.68421053	35.71428571	25	40	30	100	100	100	57.14285714	91.66666667	9.090909091
6pvm	78.94736842	35.71428571	33.33333333	40	30	100	66.66666667	50	71.42857143	91.66666667	9.090909091
6pvn	73.68421053	42.85714286	25	40	30	100	66.66666667	83.33333333	57.14285714	91.66666667	9.090909091
6bo5	84.21052632	50	25	20	30	60	66.66666667	50	57.14285714	91.66666667	9.090909091
3j9j	100	85.71428571	25	0	30	60	50	50	42.85714286	91.66666667	9.090909091
6ot5	78.94736842	35.71428571	33.33333333	40	30	100	66.66666667	66.66666667	71.42857143	91.66666667	9.090909091
6ot2	78.94736842	35.71428571	33.33333333	40	30	100	66.66666667	66.66666667	71.42857143	100	9.090909091
6mhs	78.94736842	42.85714286	33.33333333	40	30	100	66.66666667	66.66666667	71.42857143	91.66666667	9.090909091
6mhw	78.94736842	42.85714286	50	40	30	100	50	66.66666667	57.14285714	100	9.090909091
6mhx	78.94736842	42.85714286	33.33333333	40	30	100	66.66666667	50	71.42857143	100	9.090909091
6mhv	78.94736842	42.85714286	33.33333333	40	30	100	66.66666667	66.66666667	71.42857143	100	9.090909091
6mho	78.94736842	42.85714286	33.33333333	40	30	100	66.66666667	66.66666667	71.42857143	100	9.090909091
6oo3	100	35.71428571	25	20	30	60	66.66666667	33.33333333	57.14285714	100	18.18181818
6u88	84.21052632	50	41.66666667	20	30	60	50	50	42.85714286	100	18.18181818
6oo5	100	57.14285714	41.66666667	20	30	60	50	50	42.85714286	100	18.18181818
6oo4	100	42.85714286	41.66666667	20	30	60	50	33.33333333	42.85714286	100	18.18181818
6oo7	100	57.14285714	41.66666667	20	30	60	50	50	42.85714286	100	18.18181818
6bwm	84.21052632	50	41.66666667	20	30	60	50	50	42.85714286	100	18.18181818
6b5v	73.68421053	28.57142857	16.66666667	40	30	20	33.33333333	33.33333333	100	75	36.36363636
3j5r	100	85.71428571	25	0	30	60	50	50	42.85714286	91.66666667	9.090909091
3j5p	100	85.71428571	25	0	30	60	50	50	42.85714286	91.66666667	9.090909091
5irz	100	85.71428571	25	0	30	60	50	50	42.85714286	91.66666667	9.090909091
5is0	100	85.71428571	25	0	30	60	50	50	42.85714286	91.66666667	9.090909091
5irx	100	92.85714286	25	0	30	40	50	50	42.85714286	91.66666667	9.090909091
3j5q	100	78.57142857	25	0	30	40	50	50	42.85714286	91.66666667	9.090909091
6u86	84.21052632	57.14285714	41.66666667	20	30	60	50	50	42.85714286	100	18.18181818
6u84	78.94736842	50	41.66666667	20	30	60	50	50	42.85714286	100	18.18181818
6u8a	84.21052632	50	41.66666667	20	30	60	50	50	42.85714286	100	18.18181818
6bwj	94.73684211	57.14285714	41.66666667	20	30	60	50	50	42.85714286	100	18.18181818
5hi9	78.94736842	42.85714286	41.66666667	20	30	60	50	50	42.85714286	100	9.090909091
5an8	78.94736842	35.71428571	41.66666667	20	30	60	50	50	42.85714286	100	18.18181818
2r9r	47.36842105	21.42857143	41.66666667	80	0	0	66.66666667	16.66666667	28.57142857	50	18.18181818
5z1w	26.31578947	21.42857143	16.66666667	40	0	0	50	16.66666667	42.85714286	41.66666667	27.27272727
6du8	15.78947368	21.42857143	41.66666667	80	0	0	50	16.66666667	14.28571429	50	27.27272727
6ayf	52.63157895	14.28571429	0	0	10	0	16.66666667	50	28.57142857	50	90.90909091
5w3s	52.63157895	14.28571429	0	0	10	20	16.66666667	50	28.57142857	50	90.90909091
6aye	52.63157895	14.28571429	0	0	0	20	16.66666667	50	28.57142857	50	90.90909091
5wj5	52.63157895	14.28571429	0	0	0	0	16.66666667	50	28.57142857	50	100
5wj9	52.63157895	14.28571429	0	0	10	0	16.66666667	33.33333333	28.57142857	50	100
6e7z	52.63157895	14.28571429	0	0	10	0	16.66666667	50	28.57142857	50	100
6e7p	52.63157895	14.28571429	0	0	10	0	16.66666667	50	28.57142857	50	100
6e7y	52.63157895	14.28571429	0	0	10	0	16.66666667	50	28.57142857	50	100
5wpt	52.63157895	21.42857143	0	0	0	0	16.66666667	50	28.57142857	50	100
5wpv	52.63157895	14.28571429	0	0	0	0	16.66666667	50	28.57142857	50	100
5wpq	52.63157895	14.28571429	0	0	10	0	16.66666667	50	28.57142857	50	100
6ayg	52.63157895	14.28571429	0	0	10	0	16.66666667	50	0	50	90.90909091
6a70	57.89473684	21.42857143	8.333333333	0	0	0	33.33333333	0	28.57142857	33.33333333	9.090909091
5k47	26.31578947	28.57142857	41.66666667	80	20	0	50	0	28.57142857	58.33333333	45.45454545
5mke	26.31578947	28.57142857	41.66666667	80	20	20	50	0	28.57142857	58.33333333	45.45454545
5mkf	26.31578947	28.57142857	41.66666667	80	20	20	50	0	28.57142857	58.33333333	45.45454545
5t4d	26.31578947	28.57142857	25	60	20	0	50	0	28.57142857	58.33333333	45.45454545
6d1w	26.31578947	28.57142857	41.66666667	80	20	0	50	0	28.57142857	58.33333333	27.27272727
5iwk	42.10526316	0	16.66666667	40	30	20	33.33333333	33.33333333	100	25	9.090909091
6bbj	47.36842105	28.57142857	16.66666667	0	20	20	33.33333333	16.66666667	57.14285714	33.33333333	9.090909091
6drj	36.84210526	35.71428571	91.66666667	100	50	20	33.33333333	33.33333333	28.57142857	41.66666667	9.090909091
6drk	47.36842105	28.57142857	91.66666667	100	60	20	33.33333333	33.33333333	28.57142857	66.66666667	18.18181818
6d73	47.36842105	28.57142857	91.66666667	100	60	20	33.33333333	33.33333333	28.57142857	83.33333333	36.36363636
6pkx	52.63157895	28.57142857	75	40	60	20	33.33333333	33.33333333	28.57142857	83.33333333	36.36363636
6co7	36.84210526	35.71428571	91.66666667	100	60	20	33.33333333	33.33333333	28.57142857	75	36.36363636
5vkq	52.63157895	28.57142857	41.66666667	40	20	20	16.66666667	16.66666667	14.28571429	75	36.36363636
6nr3	57.89473684	21.42857143	100	100	90	20	33.33333333	33.33333333	42.85714286	66.66666667	9.090909091
6nr2	52.63157895	21.42857143	91.66666667	100	80	0	33.33333333	33.33333333	42.85714286	75	27.27272727
6nr4	52.63157895	21.42857143	91.66666667	100	80	0	33.33333333	16.66666667	42.85714286	66.66666667	18.18181818
6bpq	52.63157895	7.142857143	91.66666667	100	80	0	33.33333333	33.33333333	42.85714286	58.33333333	9.090909091
6o72	47.36842105	35.71428571	91.66666667	100	80	0	33.33333333	33.33333333	42.85714286	75	36.36363636
6o6a	47.36842105	35.71428571	91.66666667	100	80	0	33.33333333	33.33333333	42.85714286	75	36.36363636
6o6r	47.36842105	35.71428571	91.66666667	100	80	0	33.33333333	33.33333333	42.85714286	75	36.36363636
6pw4	47.36842105	7.142857143	50	100	40	40	33.33333333	33.33333333	28.57142857	50	18.18181818
6o77	52.63157895	28.57142857	91.66666667	100	90	20	33.33333333	33.33333333	42.85714286	83.33333333	27.27272727
5wp6	47.36842105	21.42857143	100	100	60	20	33.33333333	33.33333333	42.85714286	75	27.27272727
6bco	47.36842105	21.42857143	100	100	60	20	33.33333333	50	42.85714286	75	27.27272727
6bcj	47.36842105	21.42857143	100	100	60	20	33.33333333	50	42.85714286	75	27.27272727
6bcq	47.36842105	21.42857143	100	100	60	20	33.33333333	50	42.85714286	75	27.27272727
6bcl	47.36842105	21.42857143	100	100	60	20	33.33333333	50	42.85714286	75	27.27272727
6bqr	47.36842105	21.42857143	100	100	60	20	33.33333333	50	42.85714286	75	27.27272727
6bqv	47.36842105	21.42857143	100	100	60	20	33.33333333	50	42.85714286	75	27.27272727
6pkv	47.36842105	28.57142857	91.66666667	100	60	20	33.33333333	33.33333333	28.57142857	83.33333333	27.27272727
6pkw	36.84210526	28.57142857	91.66666667	100	60	20	33.33333333	33.33333333	28.57142857	66.66666667	36.36363636
5zx5	42.10526316	7.142857143	66.66666667	100	50	20	66.66666667	33.33333333	28.57142857	66.66666667	36.36363636
6bwd	42.10526316	7.142857143	66.66666667	100	50	20	66.66666667	33.33333333	28.57142857	66.66666667	36.36363636
6bwf	42.10526316	7.142857143	66.66666667	100	50	20	66.66666667	33.33333333	28.57142857	66.66666667	36.36363636
6mix	52.63157895	28.57142857	100	100	60	40	33.33333333	50	42.85714286	75	36.36363636
6bwi	47.36842105	21.42857143	100	100	60	20	33.33333333	50	42.85714286	75	27.27272727
5z96	52.63157895	35.71428571	58.33333333	100	60	20	33.33333333	0	28.57142857	83.33333333	18.18181818
6aei	57.89473684	35.71428571	58.33333333	100	60	20	33.33333333	0	28.57142857	83.33333333	18.18181818
6g1k	52.63157895	35.71428571	58.33333333	100	70	20	33.33333333	0	28.57142857	83.33333333	18.18181818
5zbg	52.63157895	35.71428571	83.33333333	100	60	20	16.66666667	0	42.85714286	83.33333333	27.27272727
5yx9	52.63157895	35.71428571	83.33333333	100	60	20	16.66666667	0	42.85714286	83.33333333	27.27272727
6cud	52.63157895	35.71428571	83.33333333	100	60	20	16.66666667	16.66666667	42.85714286	91.66666667	27.27272727
6pw5	47.36842105	7.142857143	50	100	40	40	33.33333333	33.33333333	28.57142857	50	18.18181818
