# Supplementary material for: Global alignment and assessment of TRP channel transmembrane domain structures to explore functional mechanisms
Source: eLife journal article supplement (doi:10.7554/elife.58660), 2020-08-17
Supplement: figures [file elife-58660-figures-v1.pdf]

---

## Figures and figure supplements

Global alignment and assessment of TRP channel transmembrane domain structures to explore functional mechanisms

**Katherine E Huffer *et al***

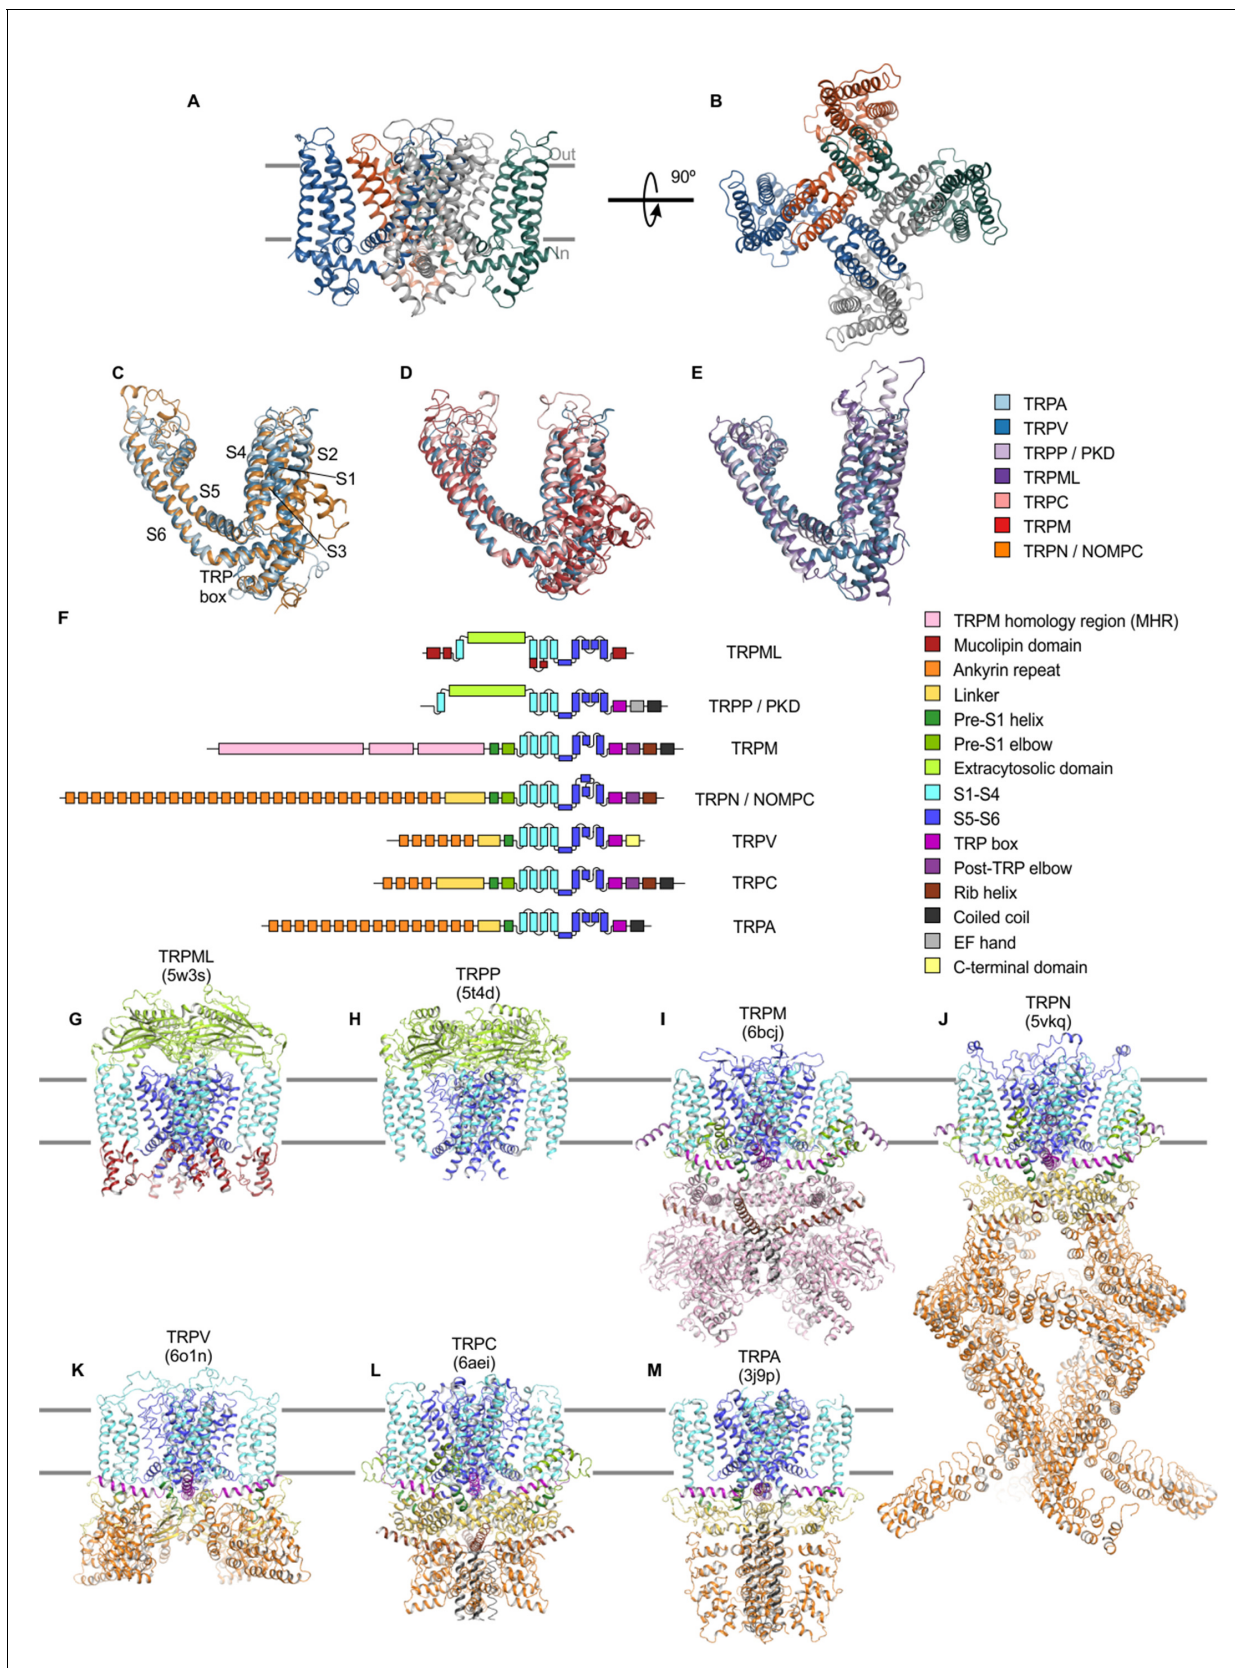

**Figure 1.** Structures of TRP channel subfamilies. (A) Backbone fold of apo TRPV1 in nanodiscs (5irz) viewed from the side, with approximate boundaries of the membrane indicated with gray bars. (B) Same structure as in A viewed from the extracellular side. (C–E) Superimposed structures of TM domains

*Figure 1 continued on next page*

*Figure 1 continued*

for apo TRPV1 (blue; 5irz) with (C) apo TRPN (orange; 5vkq) and apo TRPA1 (light blue; 3j9p), (D) apo TRPC5 (pink; 6aei) and apo TRPM4 (red; 6bcj). (E) apo TRPML3 (dark purple; 5w3s) and apo TRPP1 (light purple; 5t4d). For clarity, only one of the four subunits shown. (F) Schematic of domain architecture of TRP channel subunits. (G–M) Cartoon representation of structure with domains colored as in F of apo structures of (G) TRPML3 (5w3s), (H) TRPP1 (5t4d), (I) TRPM4 (6bcj), (J) TRPN (5vkq), (K) TRPV5 (6o1n), (L) TRPC5 (6aei), and (M) TRPA1 (3j9p).

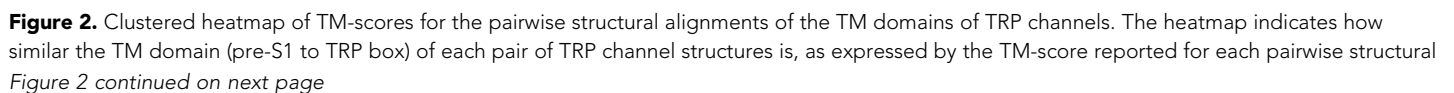



*Figure 2 continued*

alignment performed with Fr-TM-align. A comparison of identical structures is indicated with yellow (TM-score of 1), whereas no structural similarity is indicated with black (TM-score of 0). The TM-score is further used to cluster the TRP channel structures. Representative Kv, P2X and PLGIC channel structures are included as a control. Note that the heatmap is not symmetric because the TM-score takes into account the sequence length of the reference structure (see Materials and methods).

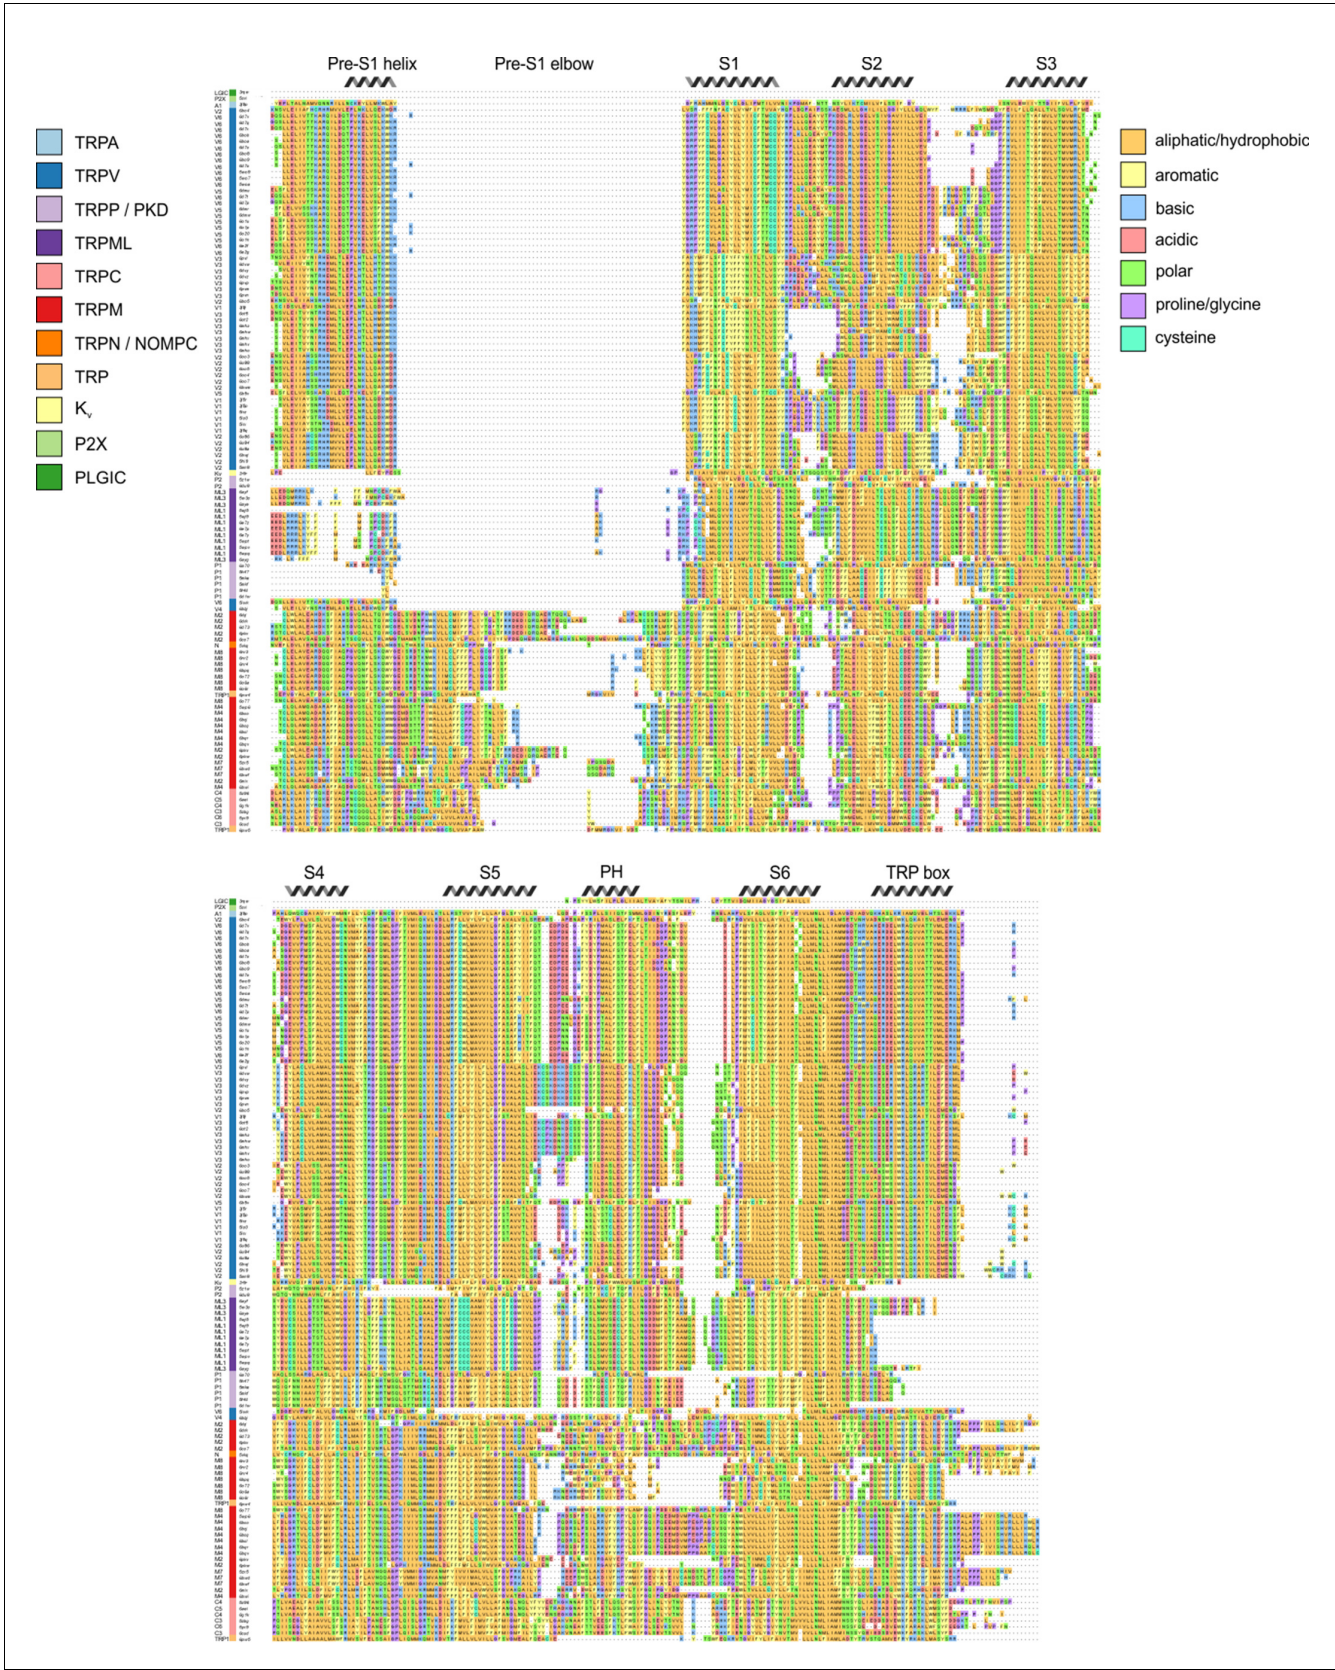

**Figure 2—figure supplement 1.** Structure-based multiple sequence alignment for TRP channels structures. Structure-based multiple sequence alignment generated from Fr-TM-Align pairwise alignments of each structure with 6co7 as the template, omitting any residue that did not align to a

*Figure 2—figure supplement 1 continued on next page*

Figure 2—figure supplement 1 continued

residue in 6co7. Sequences are ordered based on hierarchical clustering from **Figure 2**. This sequence alignment shows the bounds of what was considered part of the TM domain, spanning from the pre-S1 helix to the TRP box. All domains are labeled based on structural consensus. PH stands for pore helix.

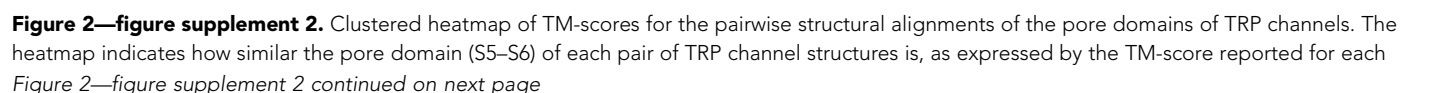

*Figure 2—figure supplement 2 continued*

pairwise structural alignment performed with Fr-TM-align. A comparison of identical structures is indicated with yellow (TM-score of 1), whereas no structural similarity is indicated with black (TM-score of 0). The TM-score is further used to cluster the TRP channel structures. Representative Kv, P2X and PLGIC channel structures are included as a control. Note that the heatmap is not symmetric because the TM-score takes into account the sequence length of the reference structure (see Materials and methods).



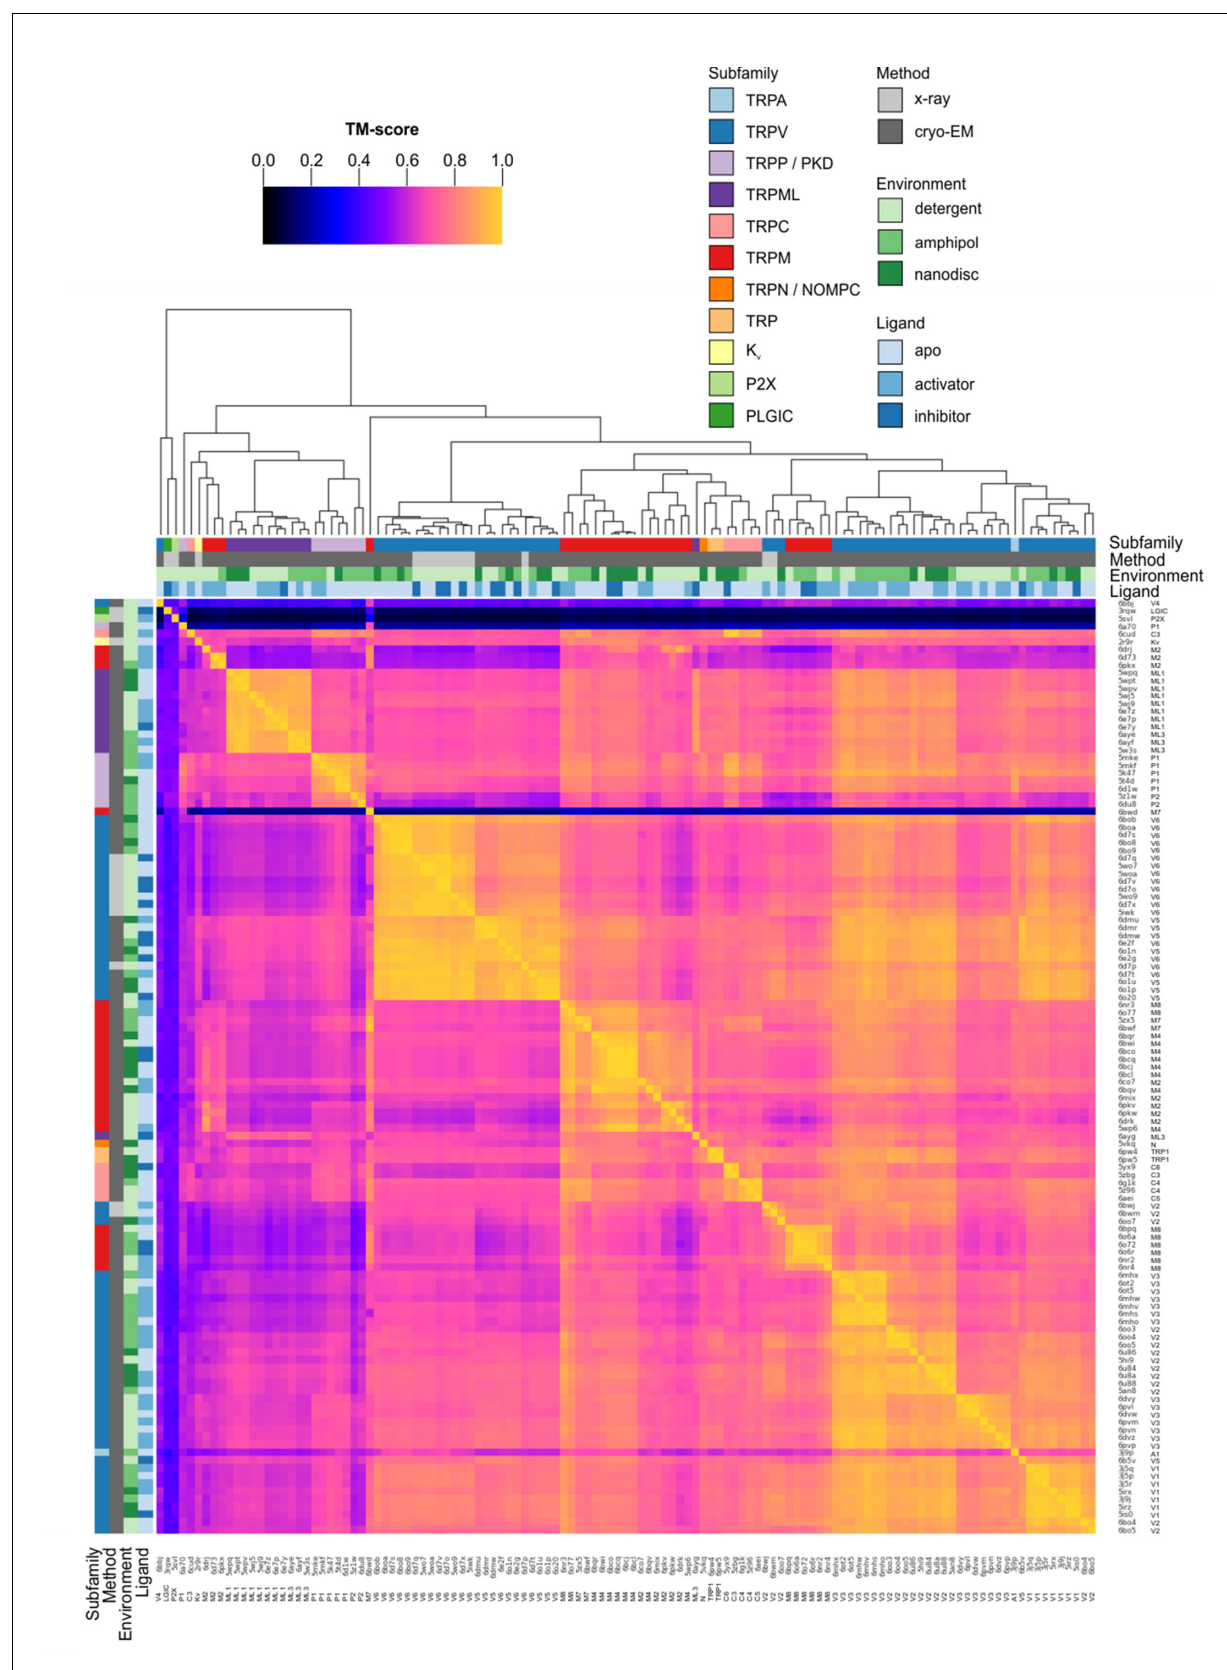

**Figure 2—figure supplement 3.** Clustered heatmap of TM-scores for the pairwise structural alignments of the S1-S4 domains of TRP channels. The heatmap indicates how similar the S1-S4 domain of each pair of TRP channel structures is, as expressed by the TM-score reported for each pairwise alignment. *Figure 2—figure supplement 3 continued on next page*



*Figure 2—figure supplement 3 continued*

structural alignment performed with Fr-TM-align. A comparison of identical structures is indicated with yellow (TM-score of 1), whereas no structural similarity is indicated with black (TM-score of 0). The TM-score is further used to cluster the TRP channel structures. Representative Kv, P2X and PLGIC channel structures are included as a control. Note that the heatmap is not symmetric because the TM-score takes into account the sequence length of the reference structure (see Materials and methods).

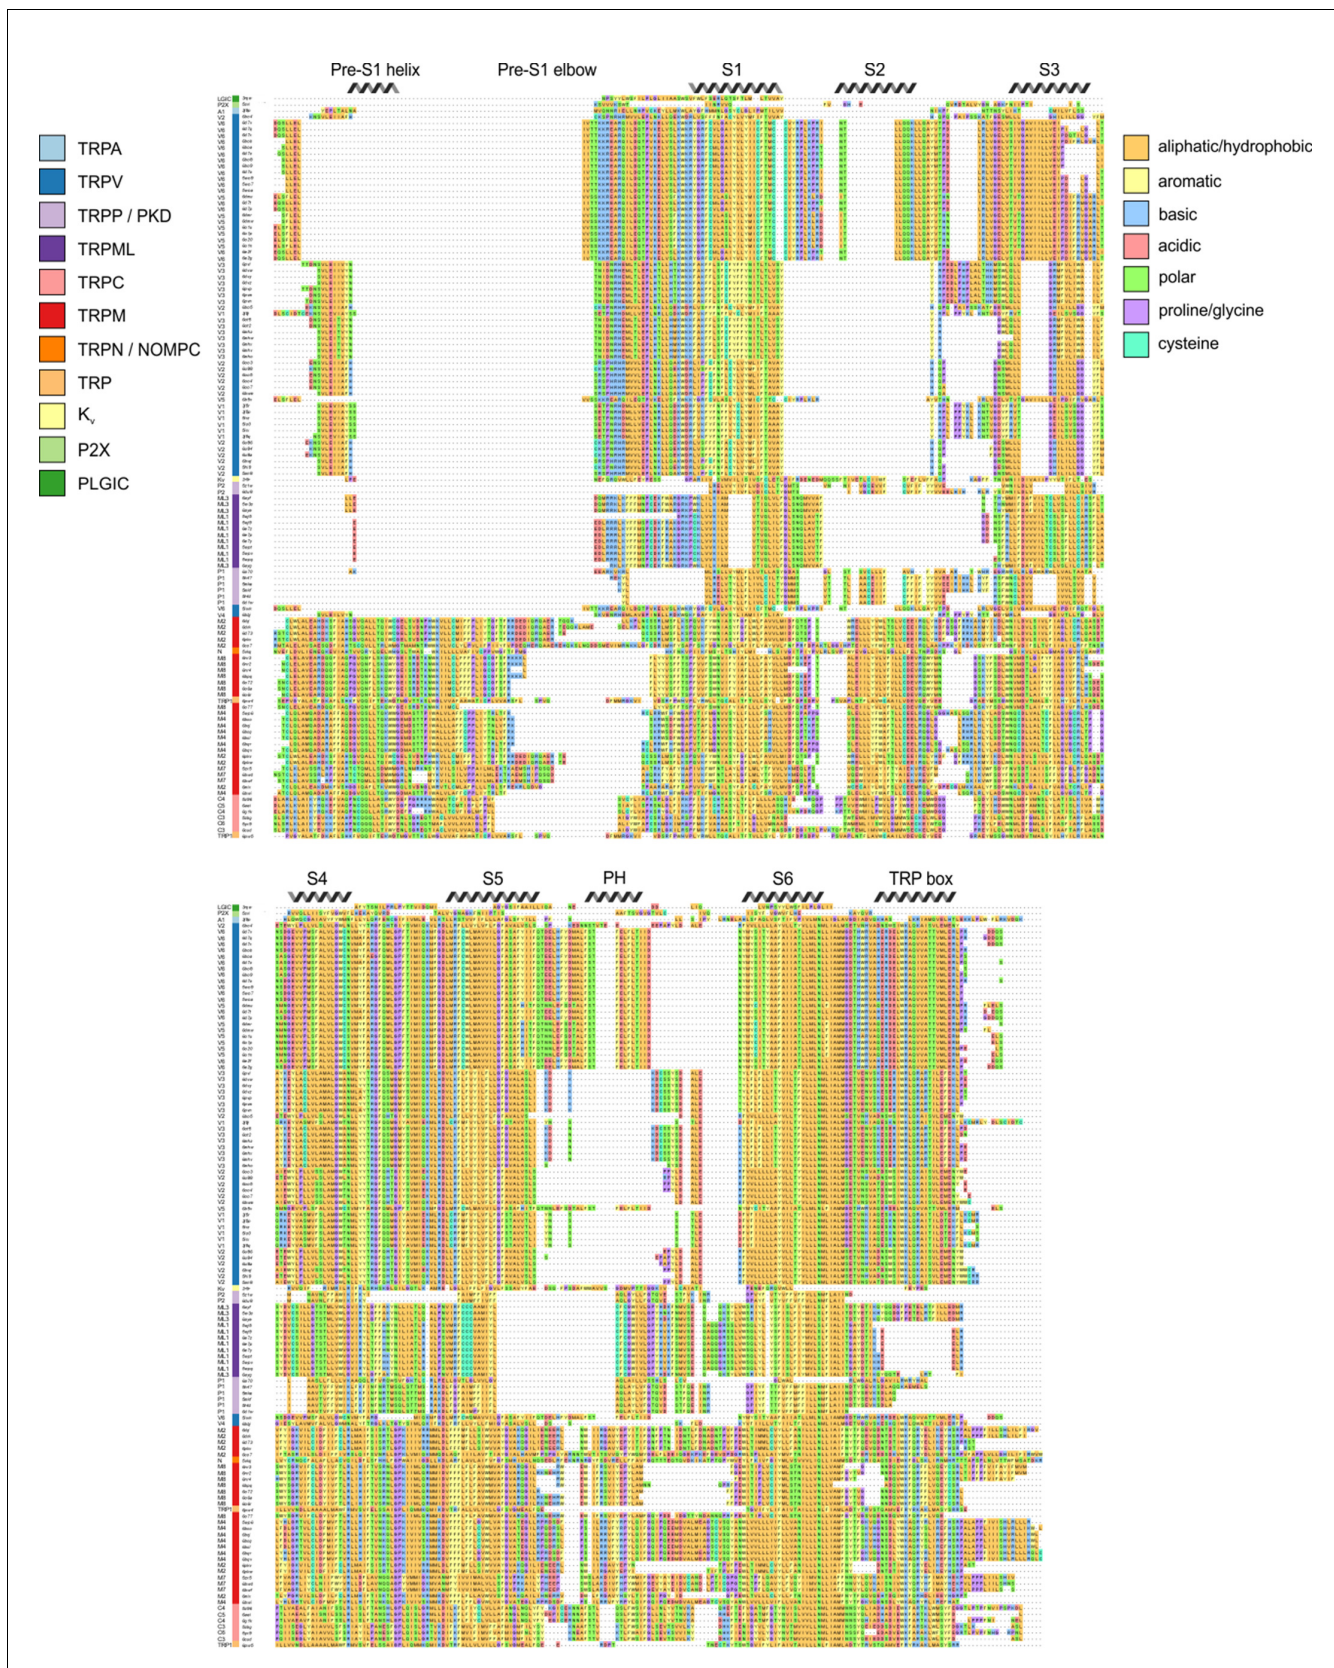

**Figure 2—figure supplement 4.** Multiple sequence alignment for TRP channel sequences whose structures have been determined and used for structure-based alignment. Sequence-based multiple sequence alignment generated from ClustalOmega alignment of amino acid sequences from Figure 2—figure supplement 4 continued on next page

Figure 2—figure supplement 4 continued

every determined structure, omitting any residue that did not align to a residue in 6co7. Sequences are ordered based on hierarchical clustering from **Figure 2**. All domains are labeled based on reference structure (6co7). PH stands for pore helix.

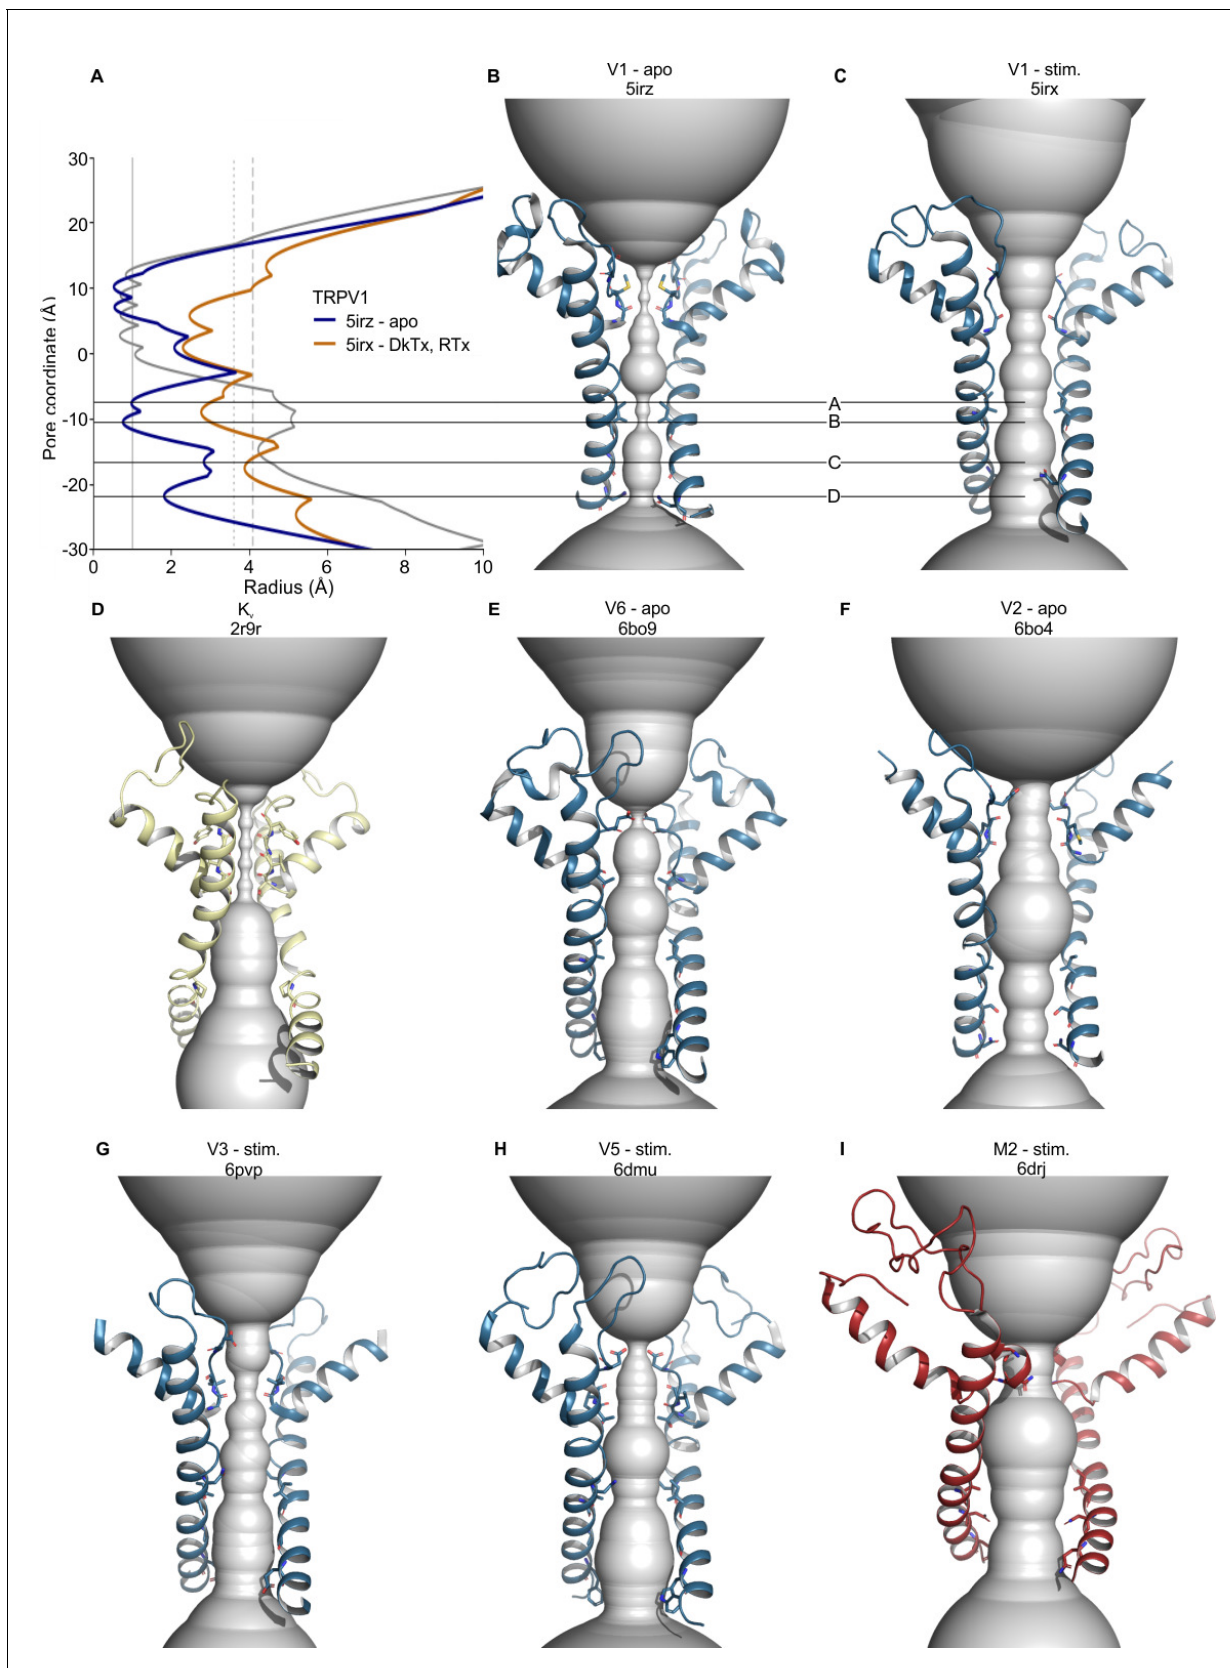

**Figure 3.** Pore radii in the S5-S6 pore domains of selected TRP channels according to HOLE. (A) Pore radius profiles for TRPV1 apo (blue, 5irz) and RTx/DkTx complex (orange, 5irx) structures and for the Kv1.2/2.1 paddle chimera (grey, 2r9r). Vertical lines indicate radii of dehydrated Na<sup>+</sup> and Ca<sup>2+</sup> ions

Figure 3 continued on next page

*Figure 3 continued*

(solid), hydrated  $\text{Na}^+$  (dotted,  $^{\text{H}}\text{Na}^+$ ) and  $\text{Ca}^{2+}$  ions (dashed,  $^{\text{H}}\text{Ca}^{2+}$ ). (B–I) Backbones of tetrameric cation channel pore domains, focusing on structures with the widest S6 gate radii, with HOLE representations in gray for (B) apo TRPV1 (5irz), (C) TRPV1 with RTX/DkTx bound (5irx), (D) Kv 1.2/2.1 paddle chimera (2r9r), (E) apo TRPV6 (6bo9), (F) apo TRPV2 (6bo4), (G) TRPV3 Y564A mutant after pretreatment at 37°C (6pvp), (H) TRPV5 with  $\text{PIP}_2$  (6dmu), and (I) TRPM2 with  $\text{Ca}^{2+}$  and ADP-ribose (6drj).



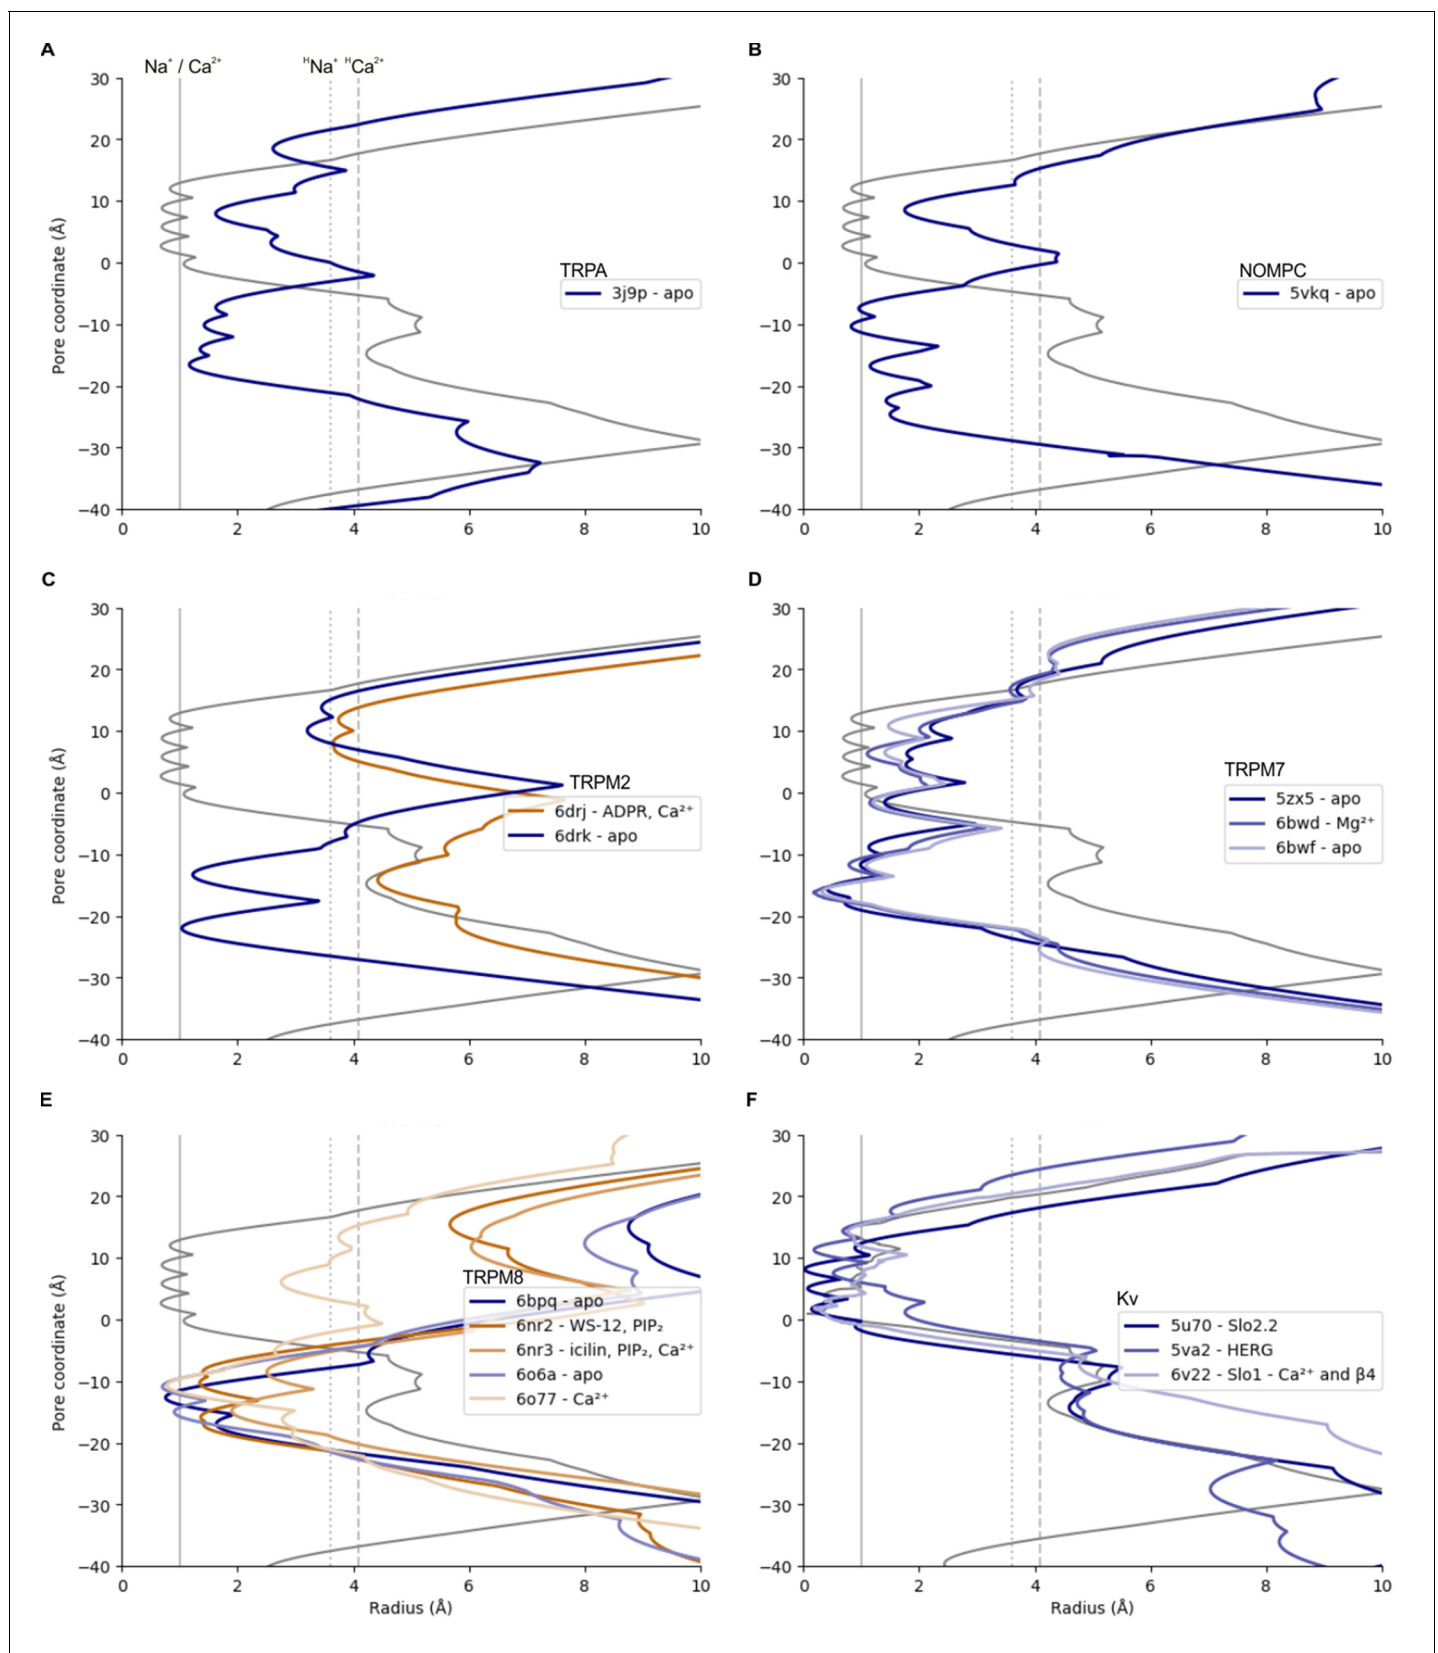

**Figure 3—figure supplement 1.** HOLE pore radius representations for S5-S6 pore domains of representative TRP and Kv channels. Pore radius profiles for TRP channel structures and for the Kv1.2/2.1 paddle chimera (grey, 2r9r). Vertical lines indicate radii of dehydrated Na<sup>+</sup> and Ca<sup>2+</sup> ions (solid), Figure 3—figure supplement 1 continued on next page



Figure 3—figure supplement 1 continued

hydrated  $\text{Na}^+$  (dotted,  $^{\text{H}}\text{Na}^+$ ) and  $\text{Ca}^{2+}$  ions (dashed,  $^{\text{H}}\text{Ca}^{2+}$ ). Profiles are shown for structures of (A) TRPA1, (B) NOMPC, (C) TRPM2, (D) TRPM7, (E) TRPM8, and (F) Kv. Where applicable, apo structure profiles are shown in blue and activator-bound structure profiles are shown in orange. Note that for TRPM8 structures shown, only 6o77 has sufficient resolution in the extracellular selectivity filter.

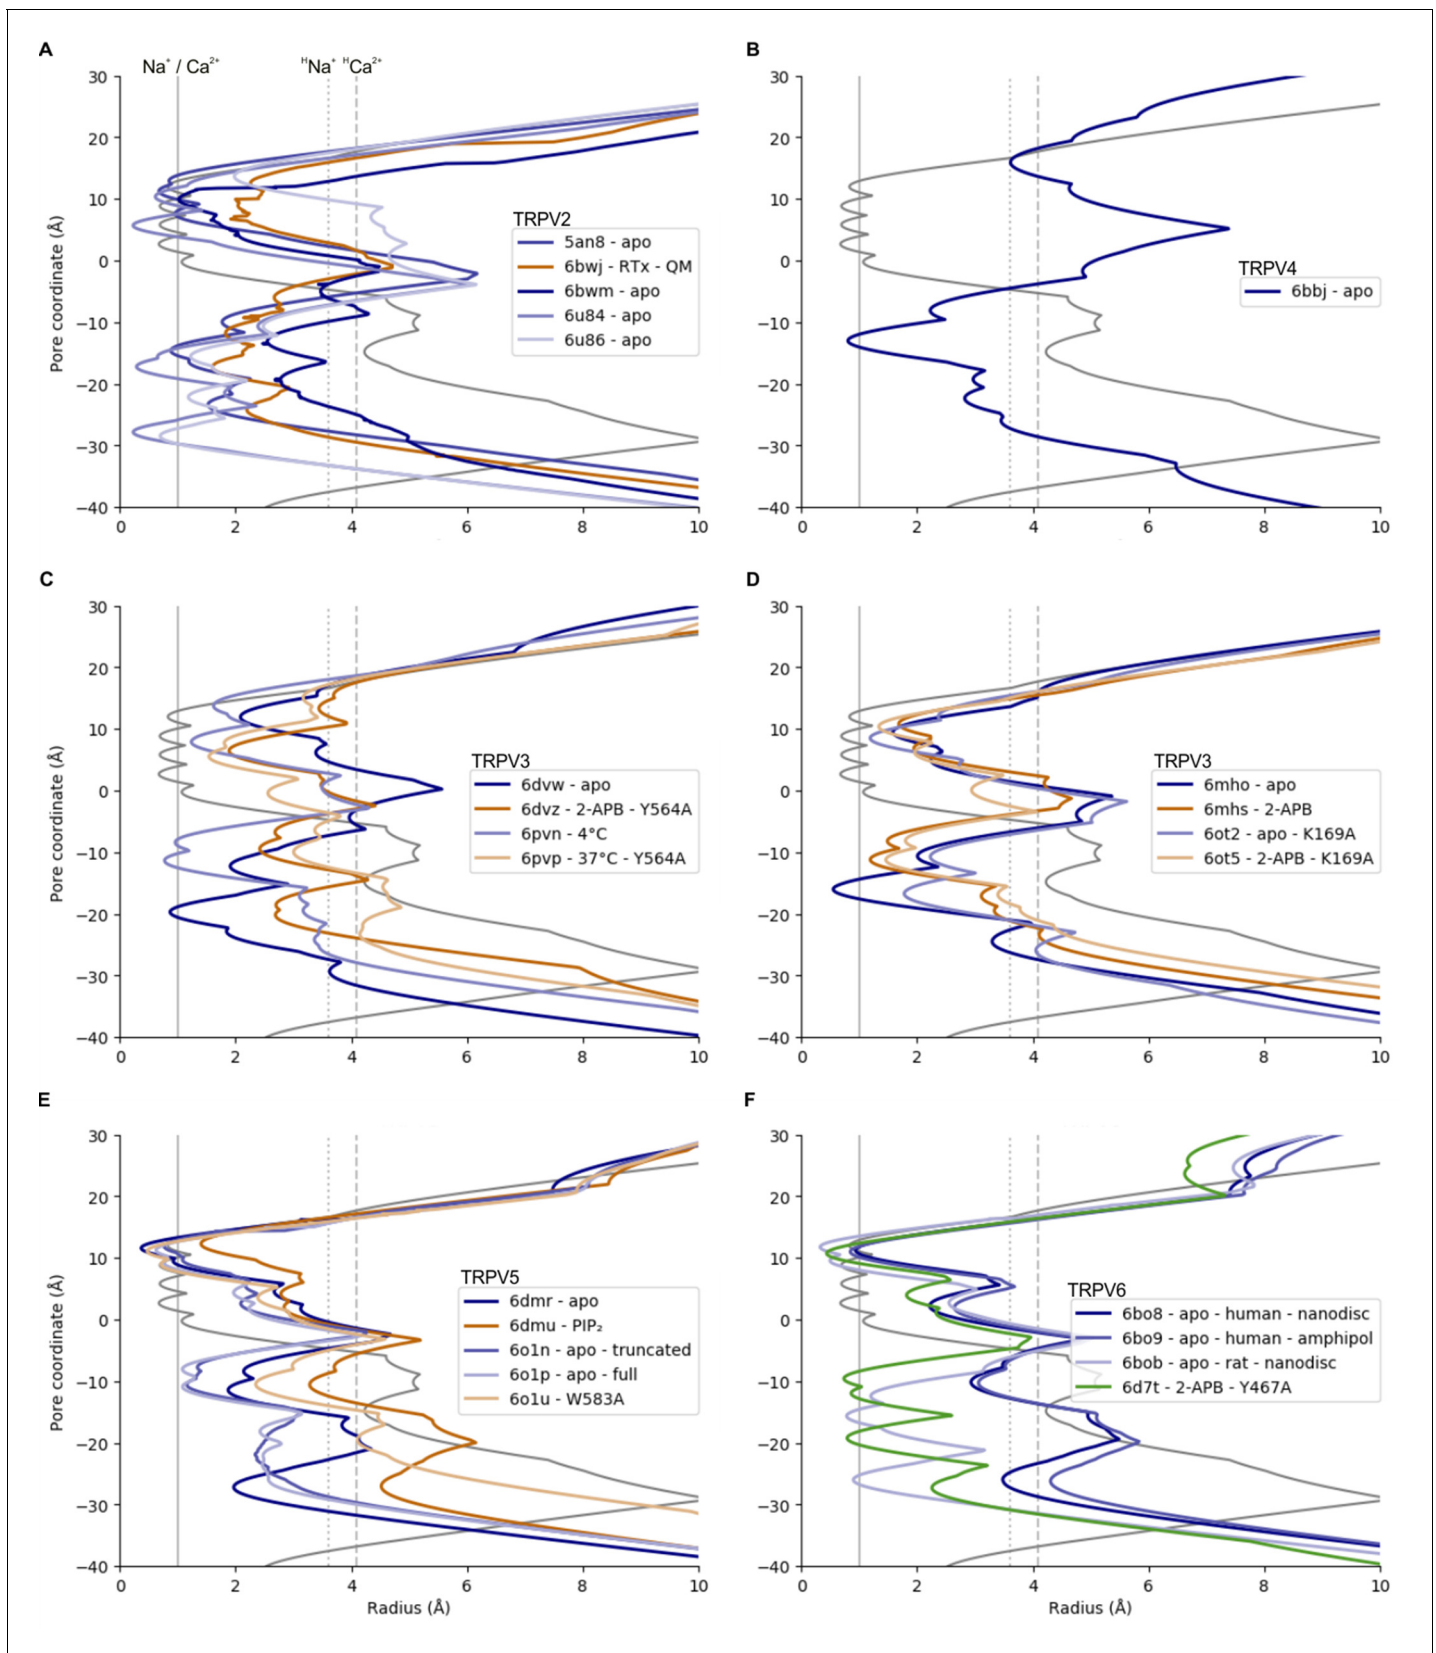

**Figure 3—figure supplement 2.** HOLE pore radius representations for S5-S6 pore domains of representative TRP channels. Pore radius profiles for TRP channel structures and for the Kv1.2/2.1 paddle chimera (grey, 2r9r). Vertical lines indicate radii of dehydrated  $\text{Na}^+$  and  $\text{Ca}^{2+}$  ions (solid), hydrated  $\text{Na}^+$  and  $\text{Ca}^{2+}$  ions (dashed).  
 Figure 3—figure supplement 2 continued on next page

Figure 3—figure supplement 2 continued

Na<sup>+</sup> (dotted, <sup>23</sup>Na<sup>+</sup>) and Ca<sup>2+</sup> ions (dashed, <sup>40</sup>Ca<sup>2+</sup>). Profiles are shown for structures of (A) TRPV2, (B) TRPV4, (C,D) TRPV3, (E) TRPV5, and (F) TRPV6. Where applicable, apo structure profiles are shown in blue, activator-bound structure profiles are shown in orange, and inhibitor-bound structure profiles are shown in green.

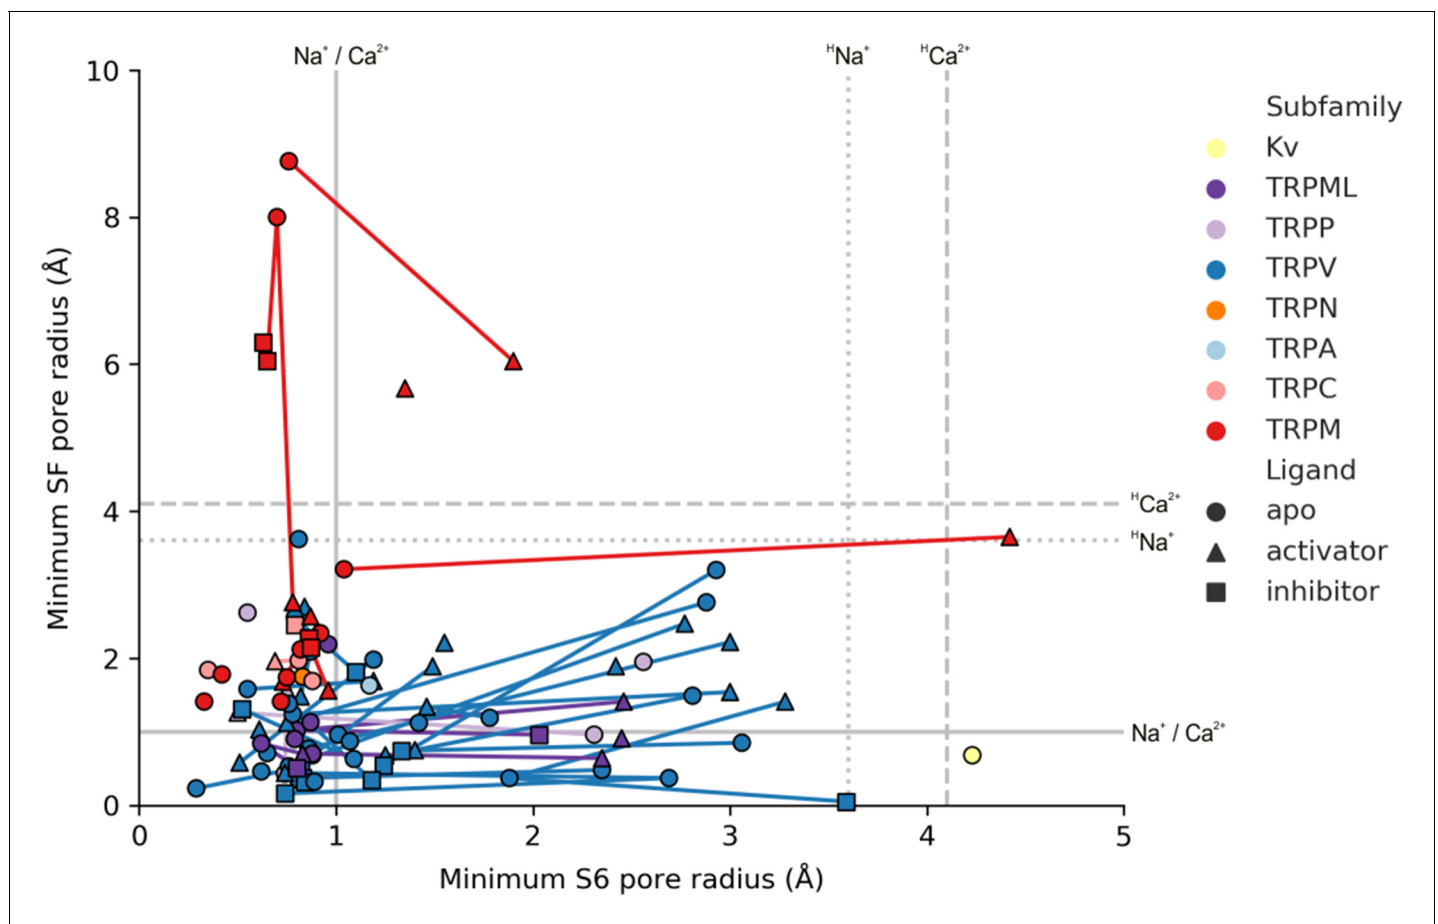

**Figure 3—figure supplement 3.** Comparing selectivity filter and internal pore minimum radii for TRP channel structures. The narrowest pore radius formed by the selectivity filter (SF) is plotted against the narrowest pore radius found at the internal end of S6. Each marker represents one structure. Markers that represent the same channel determined under different conditions to obtain different conformations are connected with lines. Grey lines represent radii of dehydrated  $\text{Na}^+$  and  $\text{Ca}^{2+}$  ions (solid), hydrated  $\text{Na}^+$  (dotted,  $^{\text{H}}\text{Na}^+$ ) and hydrated  $\text{Ca}^{2+}$  ions (dashed,  $^{\text{H}}\text{Ca}^{2+}$ ).

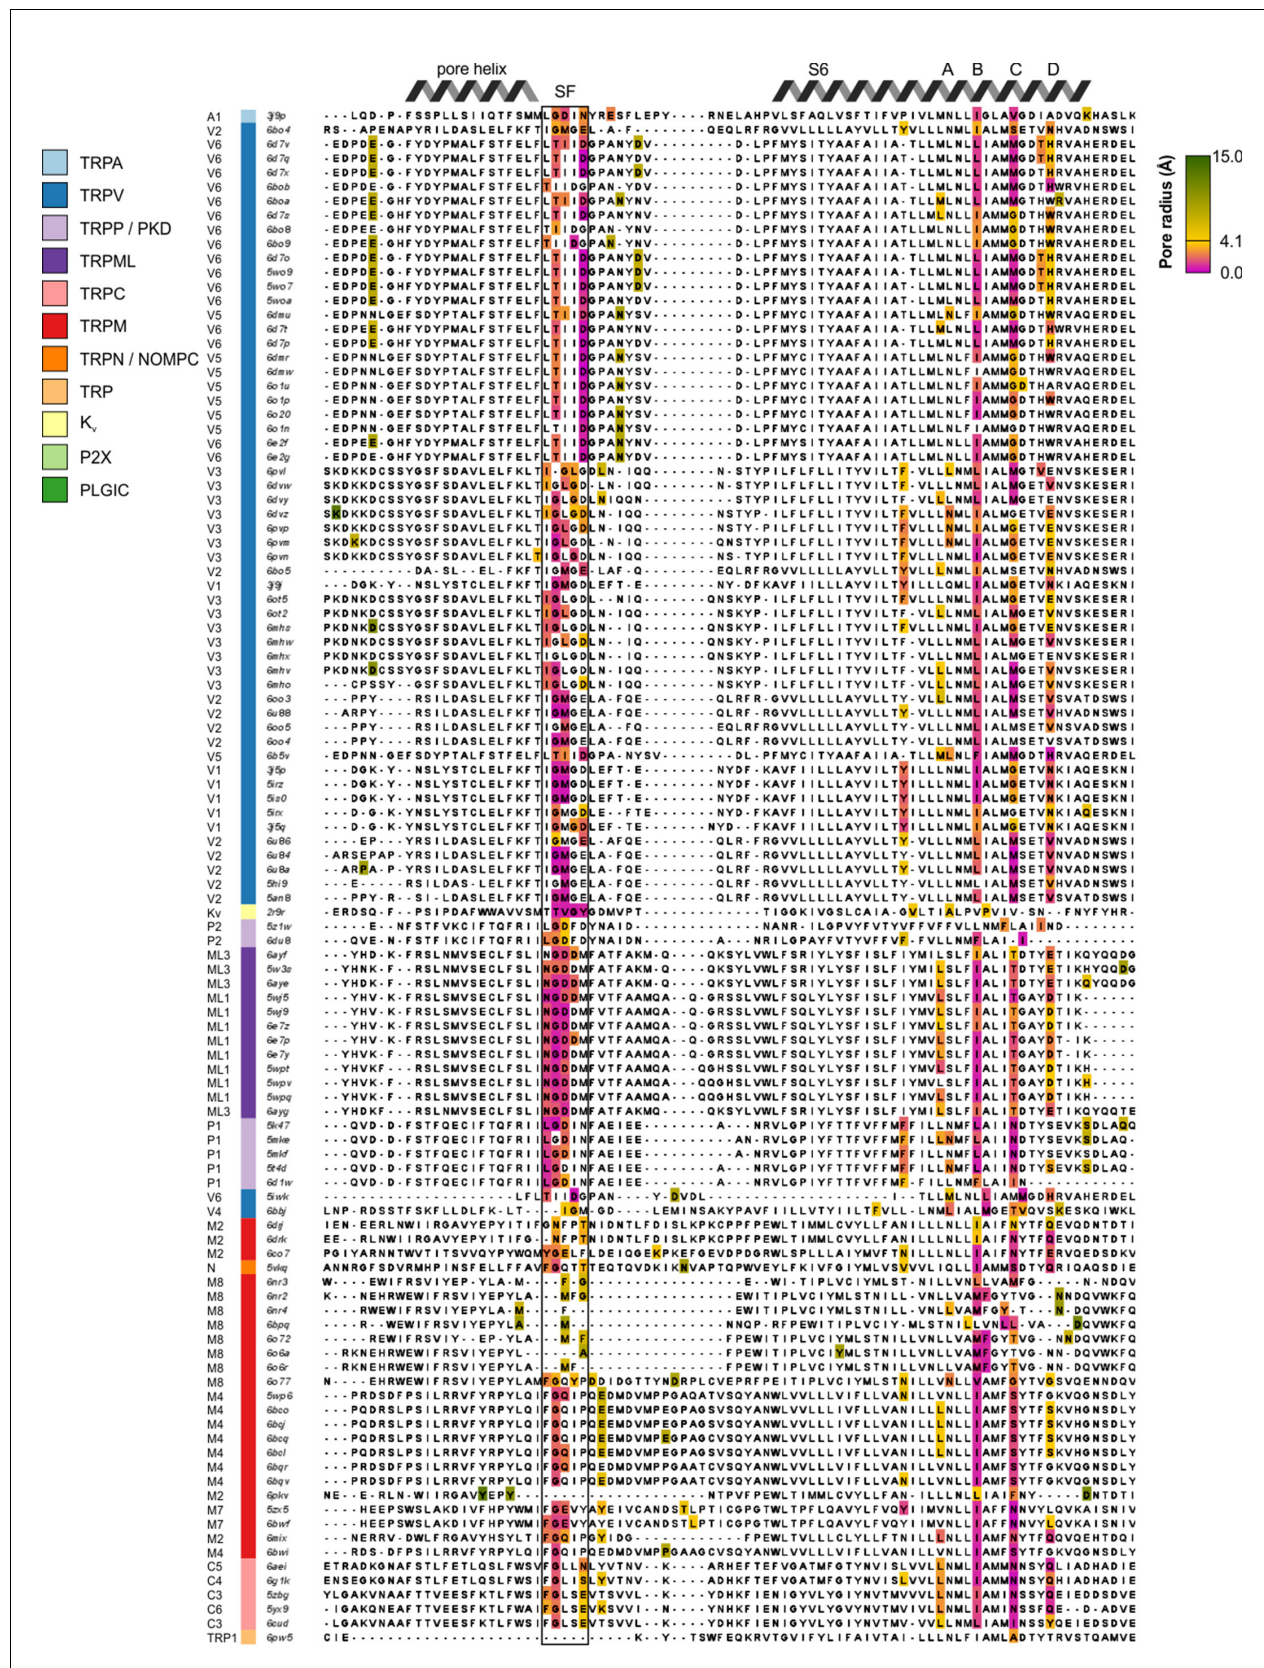

**Figure 4.** Structure-based multiple sequence alignment of pore-lining residues. Structure-based multiple sequence alignment of pore-lining residues, with pore-contributing residues colored based on the narrowest pore radius associated with any atom in that residue (from magenta for narrowest to green for widest). *Figure 4 continued on next page*

Figure 4 continued

green for widest, passing through gold at 4.1 Å to represent the radius of a hydrated  $\text{Ca}^{2+}$  ion). Uncolored residues do not have any atoms whose van der Waals radii intersect with the HOLE profile. Sequences are ordered based on hierarchical clustering from **Figure 2**. The selectivity filter is indicated by SF.



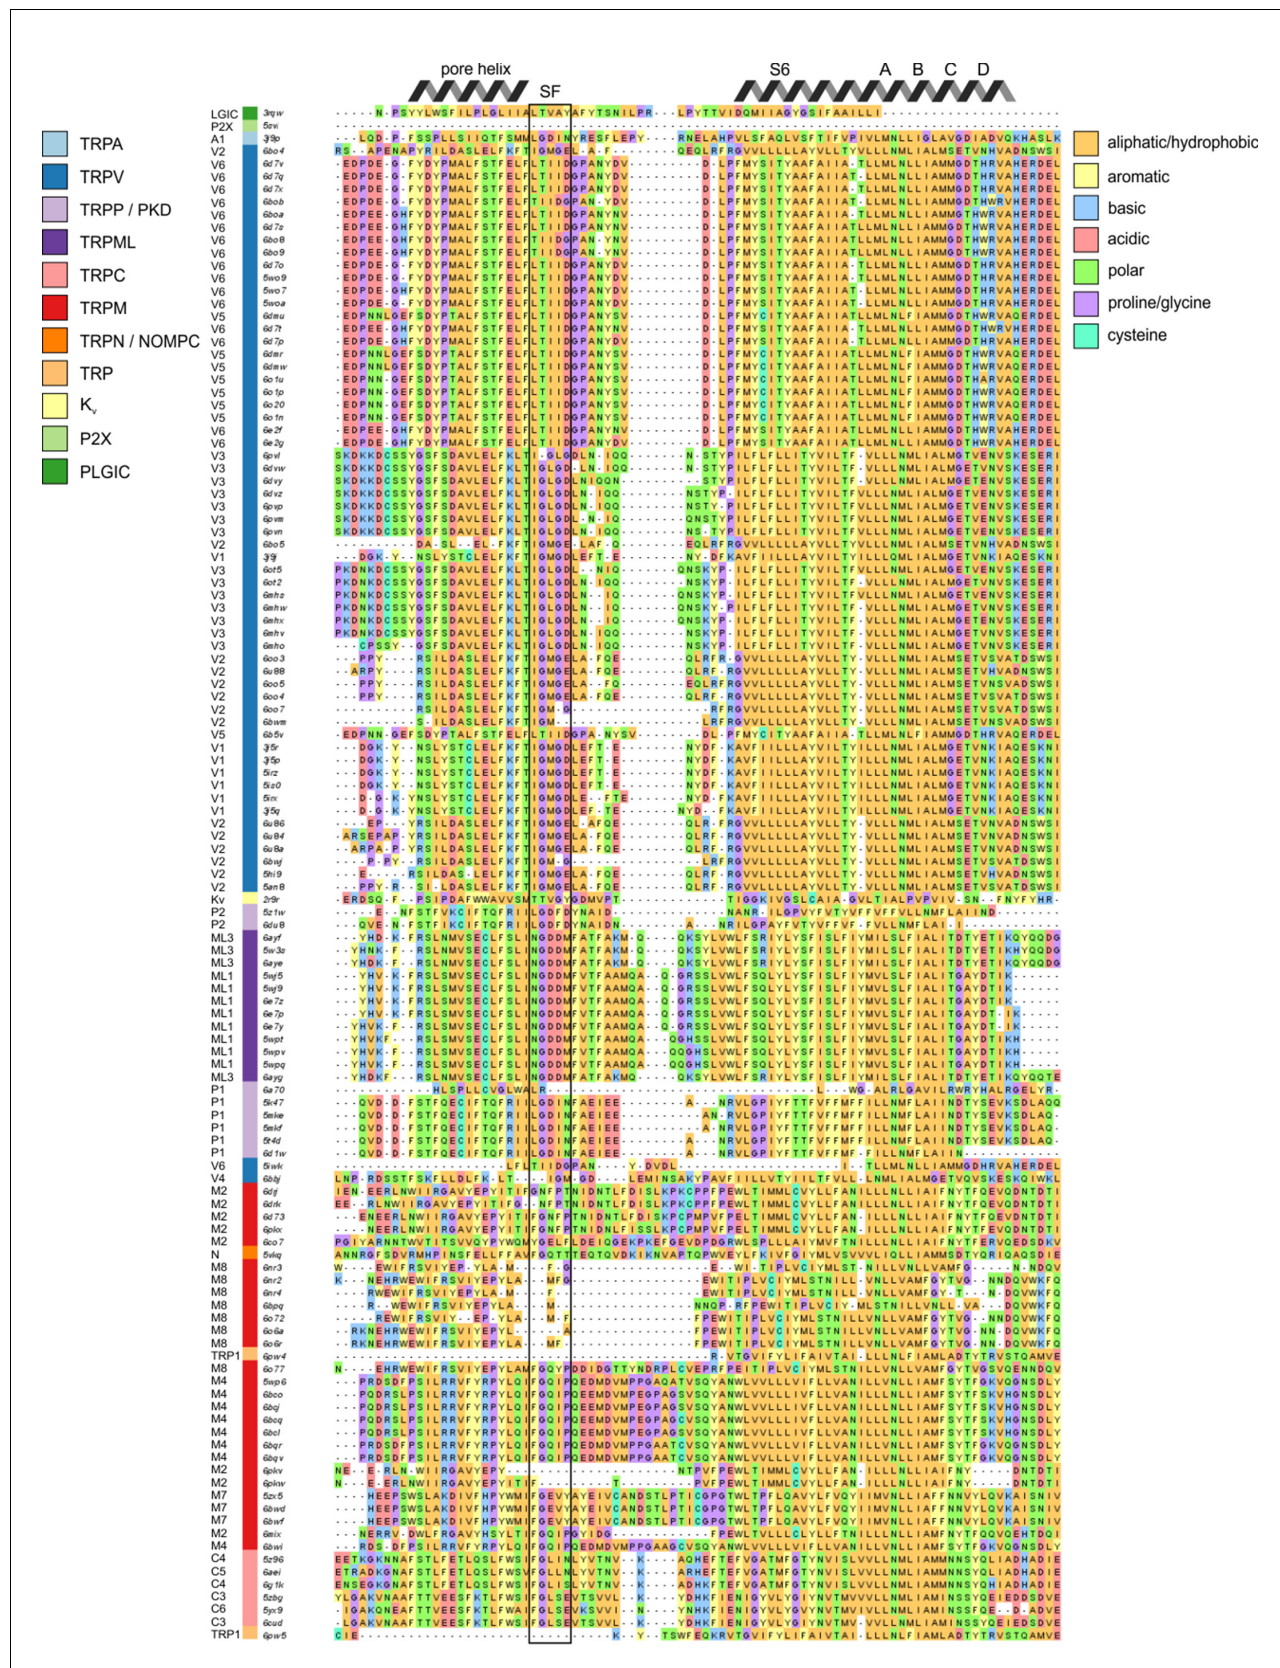

**Figure 4—figure supplement 1.** Structure-based multiple sequence alignment of pore-lining residues. Structure-based multiple sequence alignment of pore-lining residues, with all residues colored based on side chain character. Sequences are ordered based on hierarchical clustering from **Figure 2**. The selectivity filter is indicated by SF.

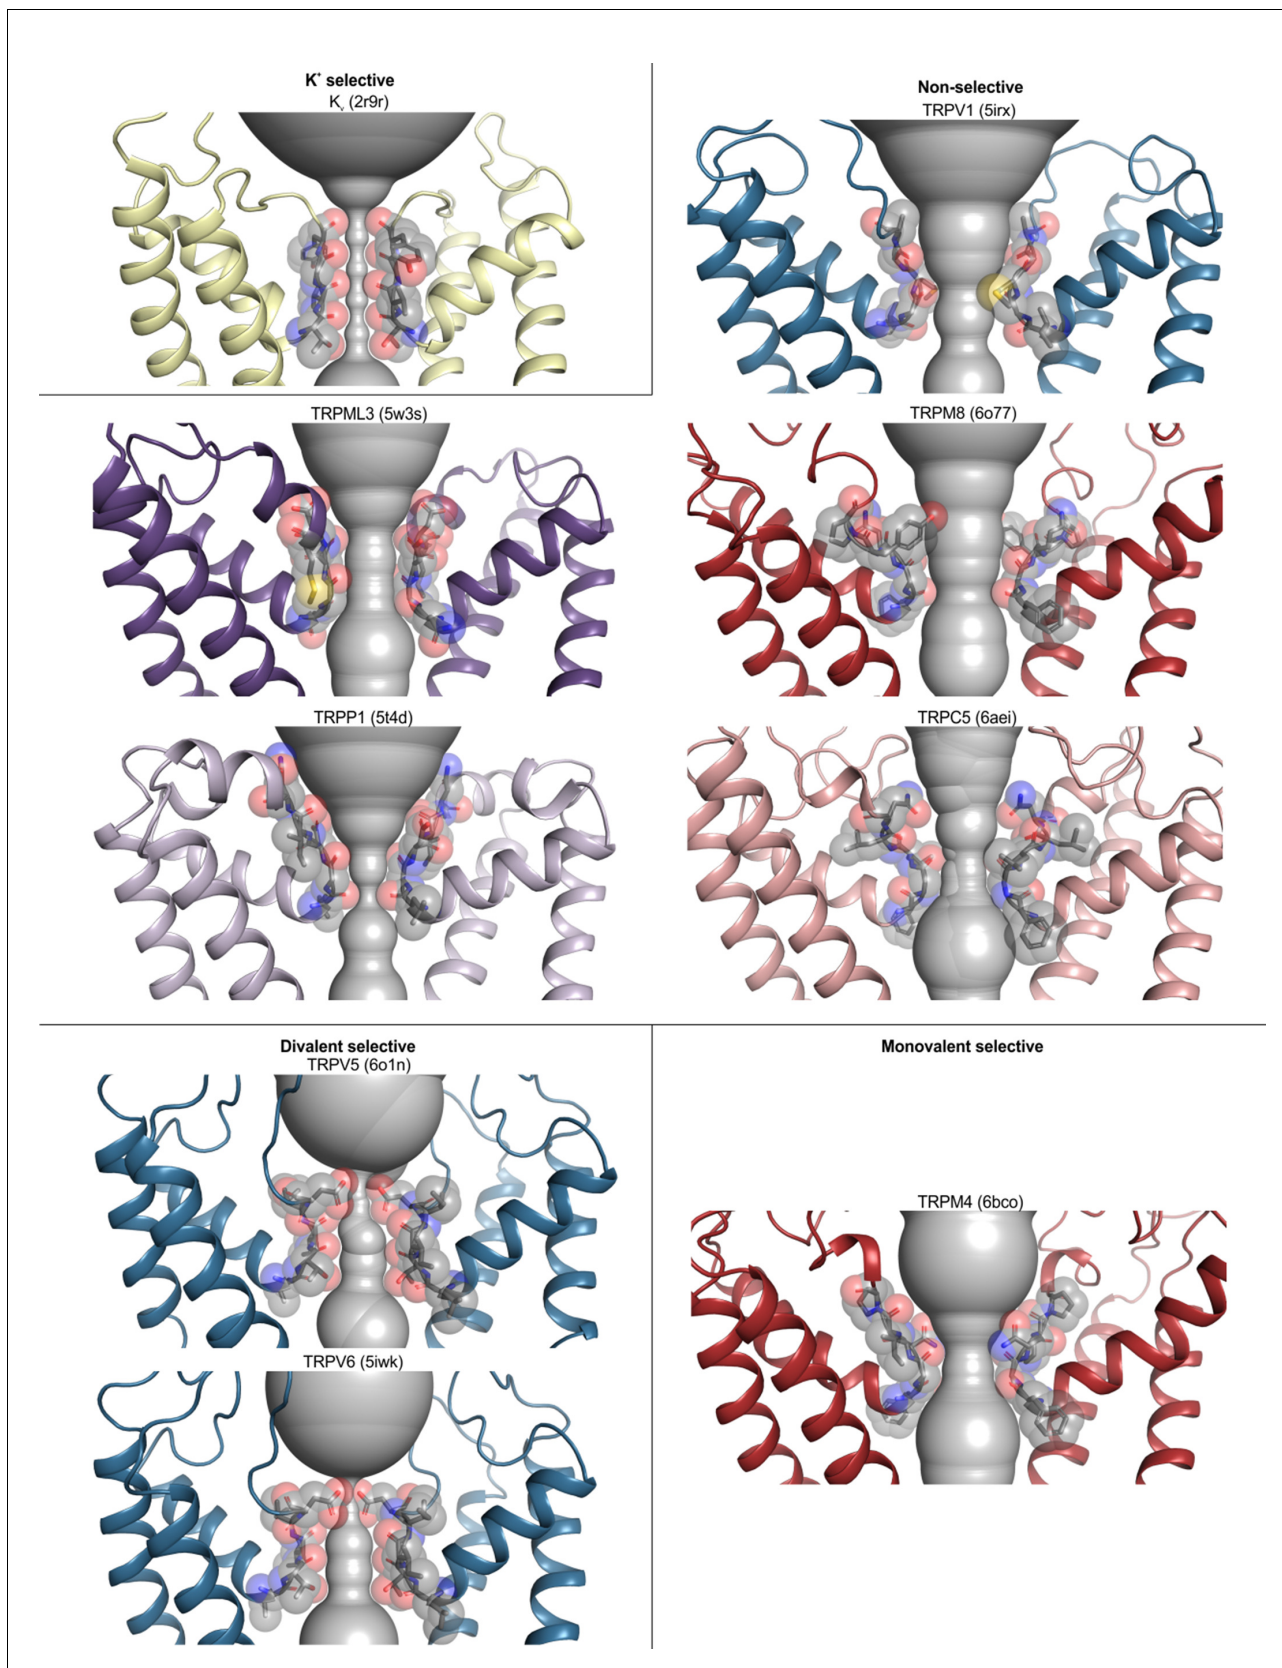

**Figure 5.** Selectivity filters in TRP channels with different ion selectivity. Pore domains (S5–S6) of selected TRP channels, focusing on the selectivity filter constriction at the extracellular end of the pore. Residues lining the selectivity filter are shown as grey sticks and spheres, with HOLE profiles shown

Figure 5 continued on next page

*Figure 5 continued*

in grey. PDB accession codes are 2r9r (Kv 1.2/2.1 paddle chimera), 5irx (TRPV1), 5w3s (TRPML3), 6o77 (TRPM8), 5t4d (TRPP1), 6aei (TRPC5), 6o1n (TRPV5), 5iwk (TRPV6), and 6bco (TRPM4). While TRPM5 is also classified as monovalent-selective, there are no structures available for this channel.



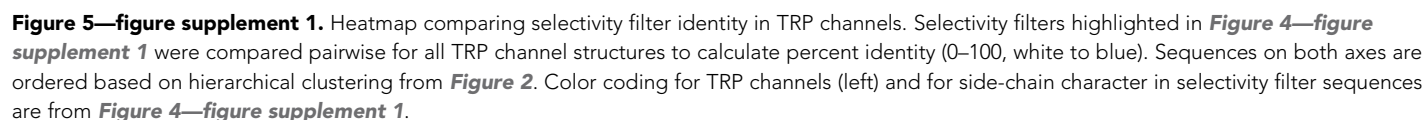

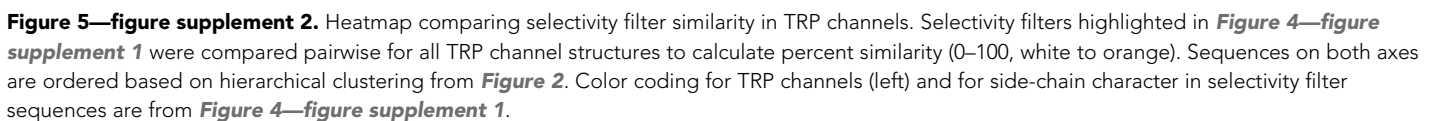



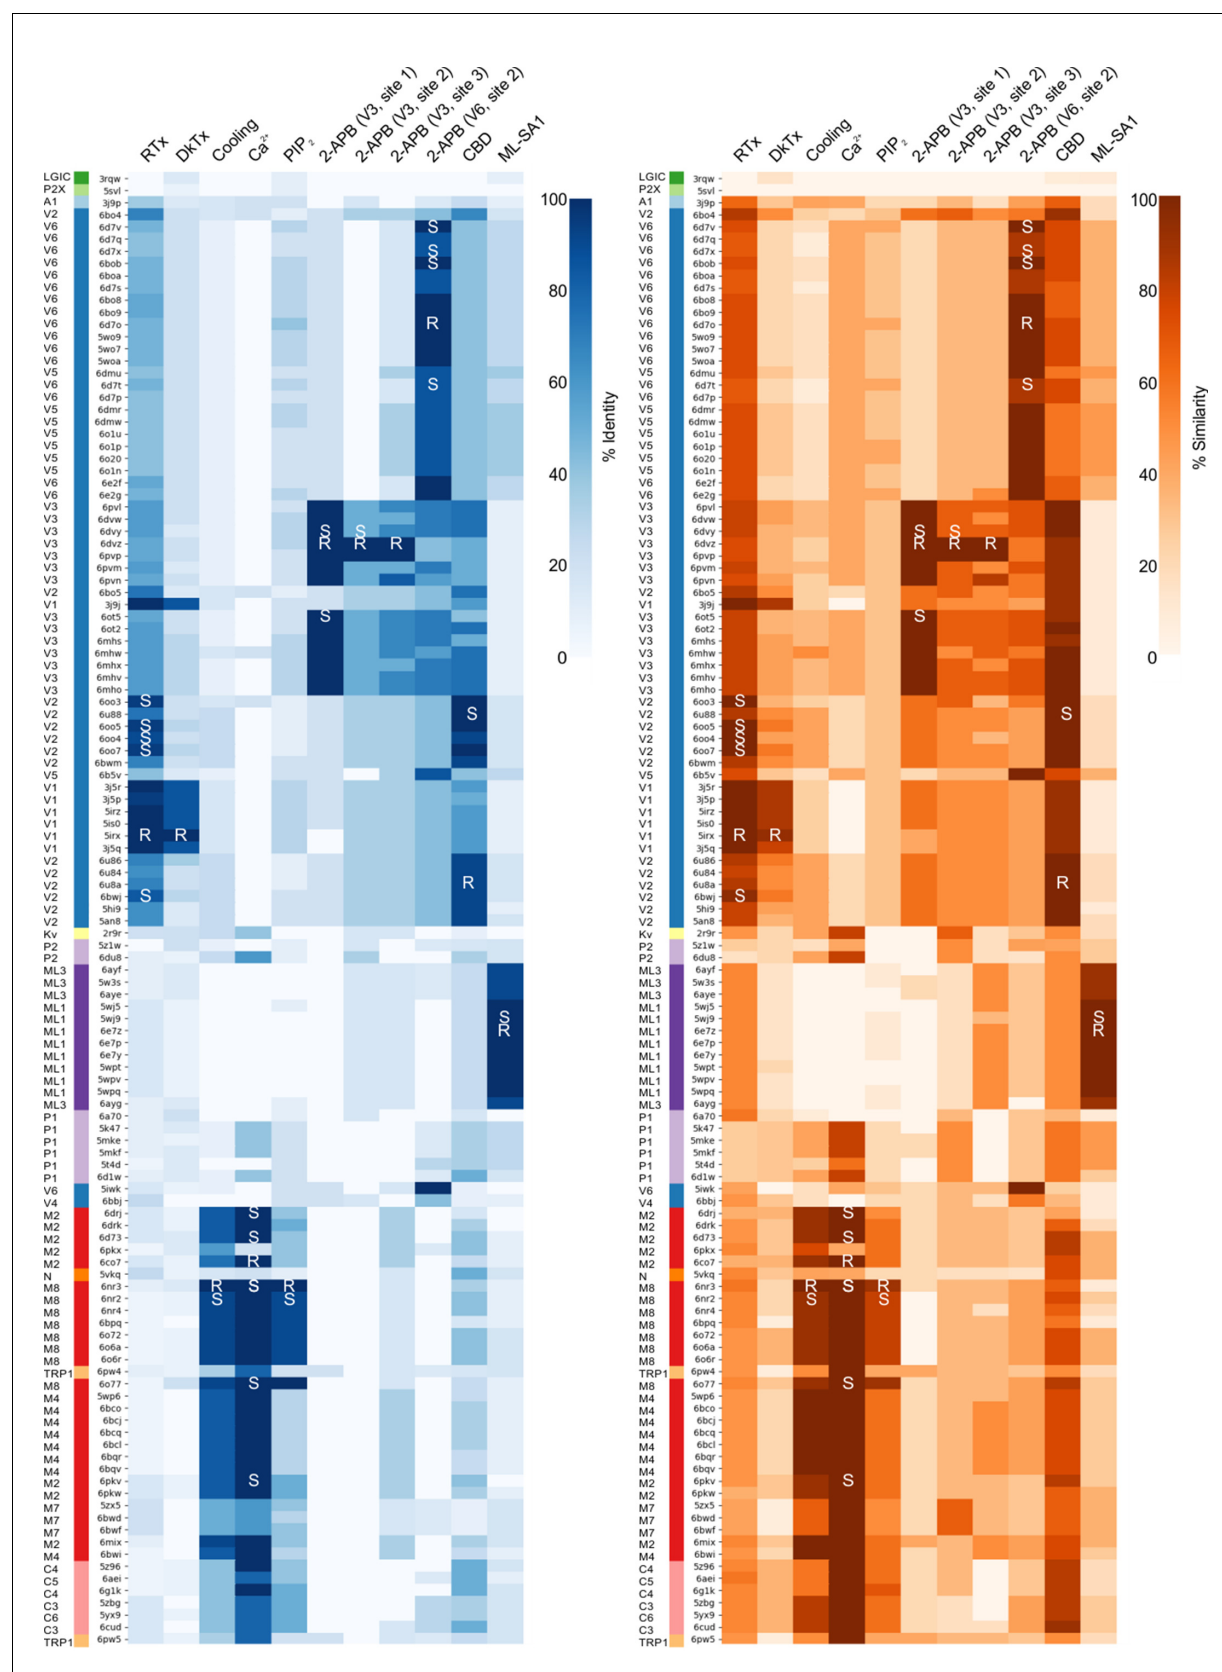

**Figure 6.** Heatmaps comparing ligand binding pocket motifs in TRP channels. Ligand-binding motifs were identified as including any residues with a side chain within 4 Å of the ligand. Heatmaps comparing the ligand-binding motifs in all structures based on percent identity (0–100, white to blue) or percent similarity (0–100, white to orange). *Figure 6 continued on next page*

*Figure 6 continued*

similarity (0–100, white to orange) when compared to the reference ligand-binding motif indicated with the letter R. Additional structures in which the ligand is also found are indicated with S (for secondary). Ligand-protein interactions are shown in **Figure 7**, **Figure 8**, **Figure 9**, and **Figure 9—figure supplement 1**. Sequences are ordered based on hierarchical clustering from **Figure 2**. Color code for TRP channels is from **Figure 2**.

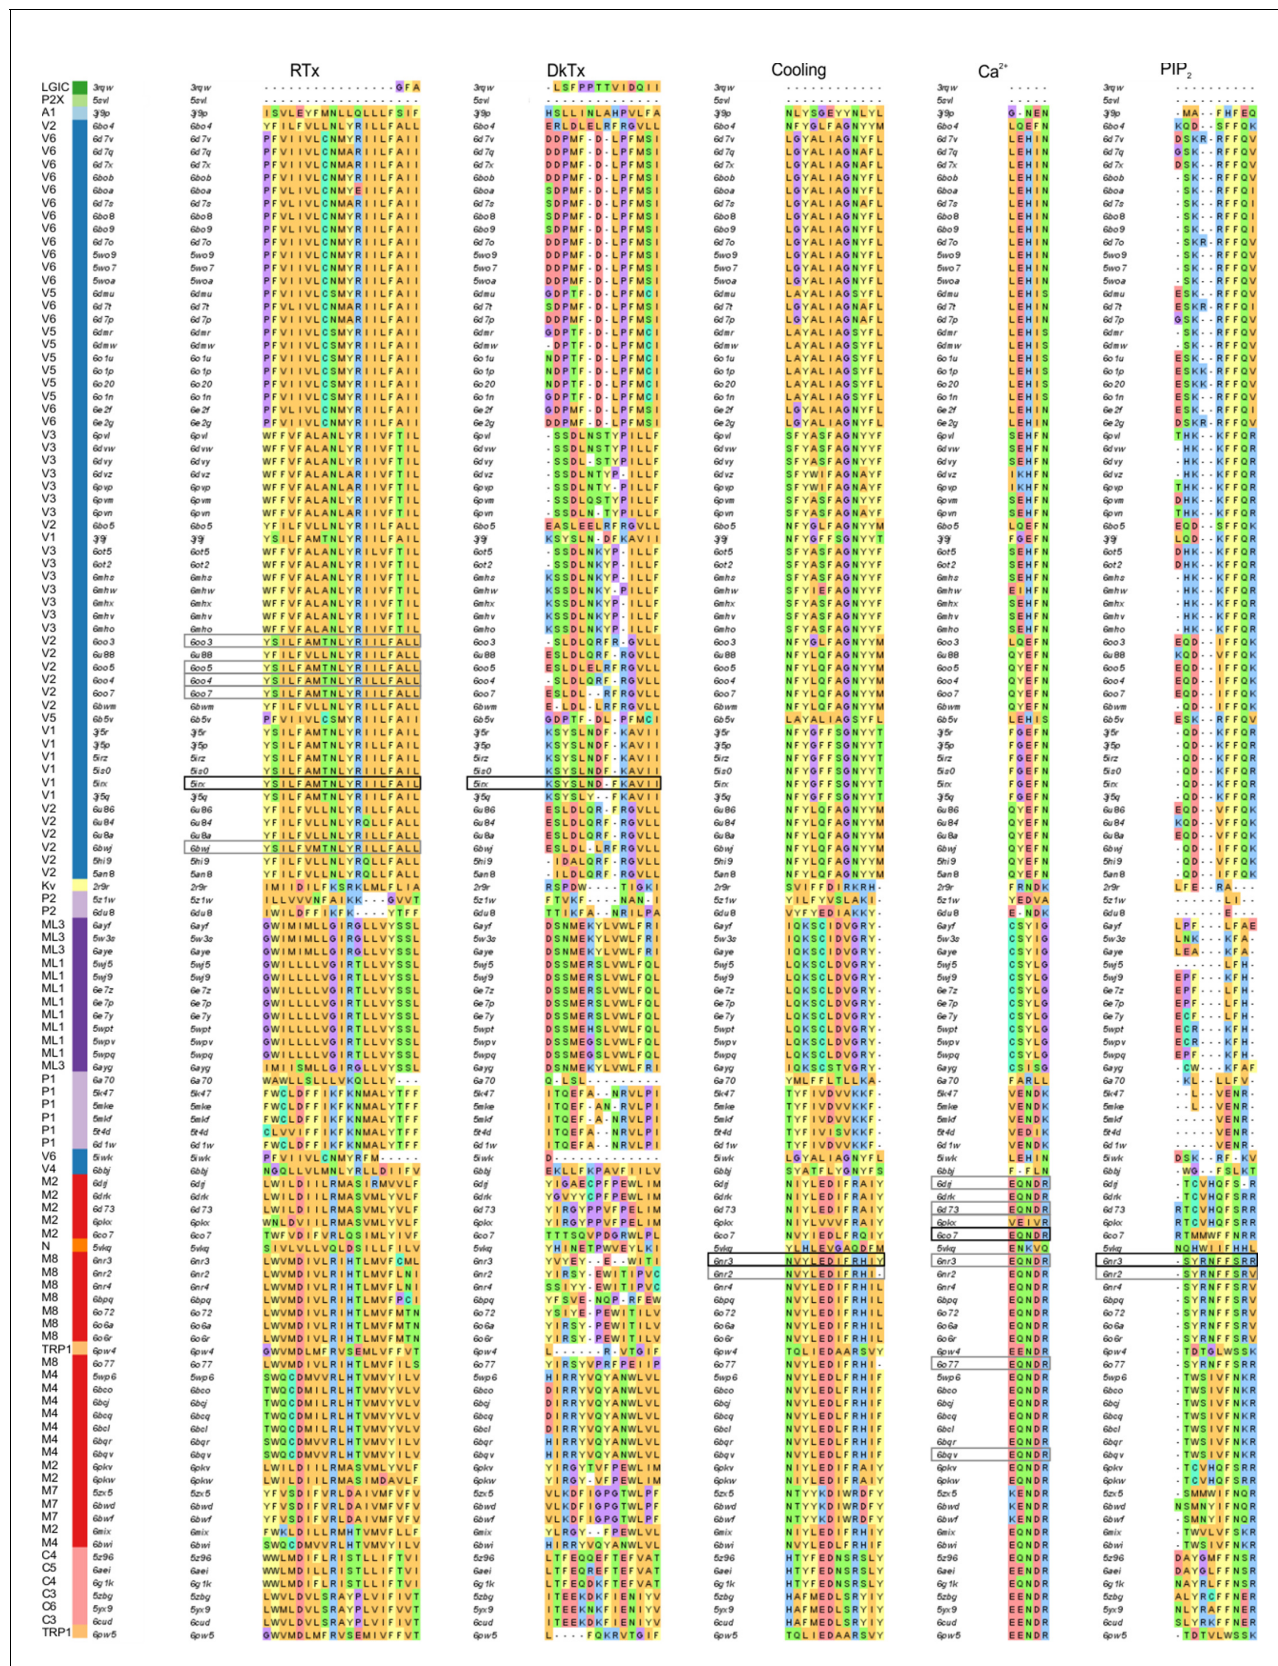

**Figure 6—figure supplement 1.** Multiple sequence alignments for ligand-binding pocket motifs in TRP channels. Ligand-binding motifs were identified as including any residues with a side chain within 4 Å of the ligand. Equivalent ligand-binding motifs for each structure identified based on Figure 6—figure supplement 1 continued on next page

*Figure 6—figure supplement 1 continued*

alignment with the ligand-binding motif from the parent ligand-bound structure. The reference ligand-bound structures are highlighted with black boxes, and secondary ligand-bound structures are highlighted with grey boxes. Ligand binding locations are shown in **Figure 7** and **Figure 8**. Sequences are ordered based on hierarchical clustering from **Figure 2**. Color coding for TRP channels (left) and for side-chain character are from **Figure 4—figure supplement 1**.



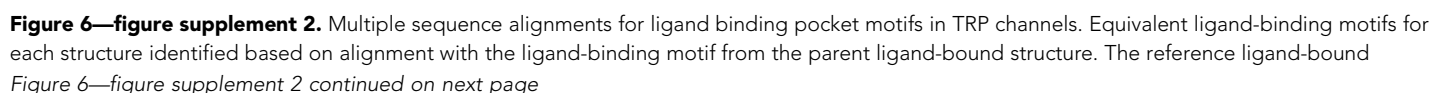



*Figure 6—figure supplement 2 continued*

structures are highlighted with black boxes, and secondary ligand-bound structures are highlighted with grey boxes. Ligand binding locations are shown in **Figure 9** and **Figure 9—figure supplement 1**. Sequences are ordered based on hierarchical clustering from **Figure 2**. Color coding for TRP channels (left) and for side-chain character are from **Figure 4—figure supplement 1**.

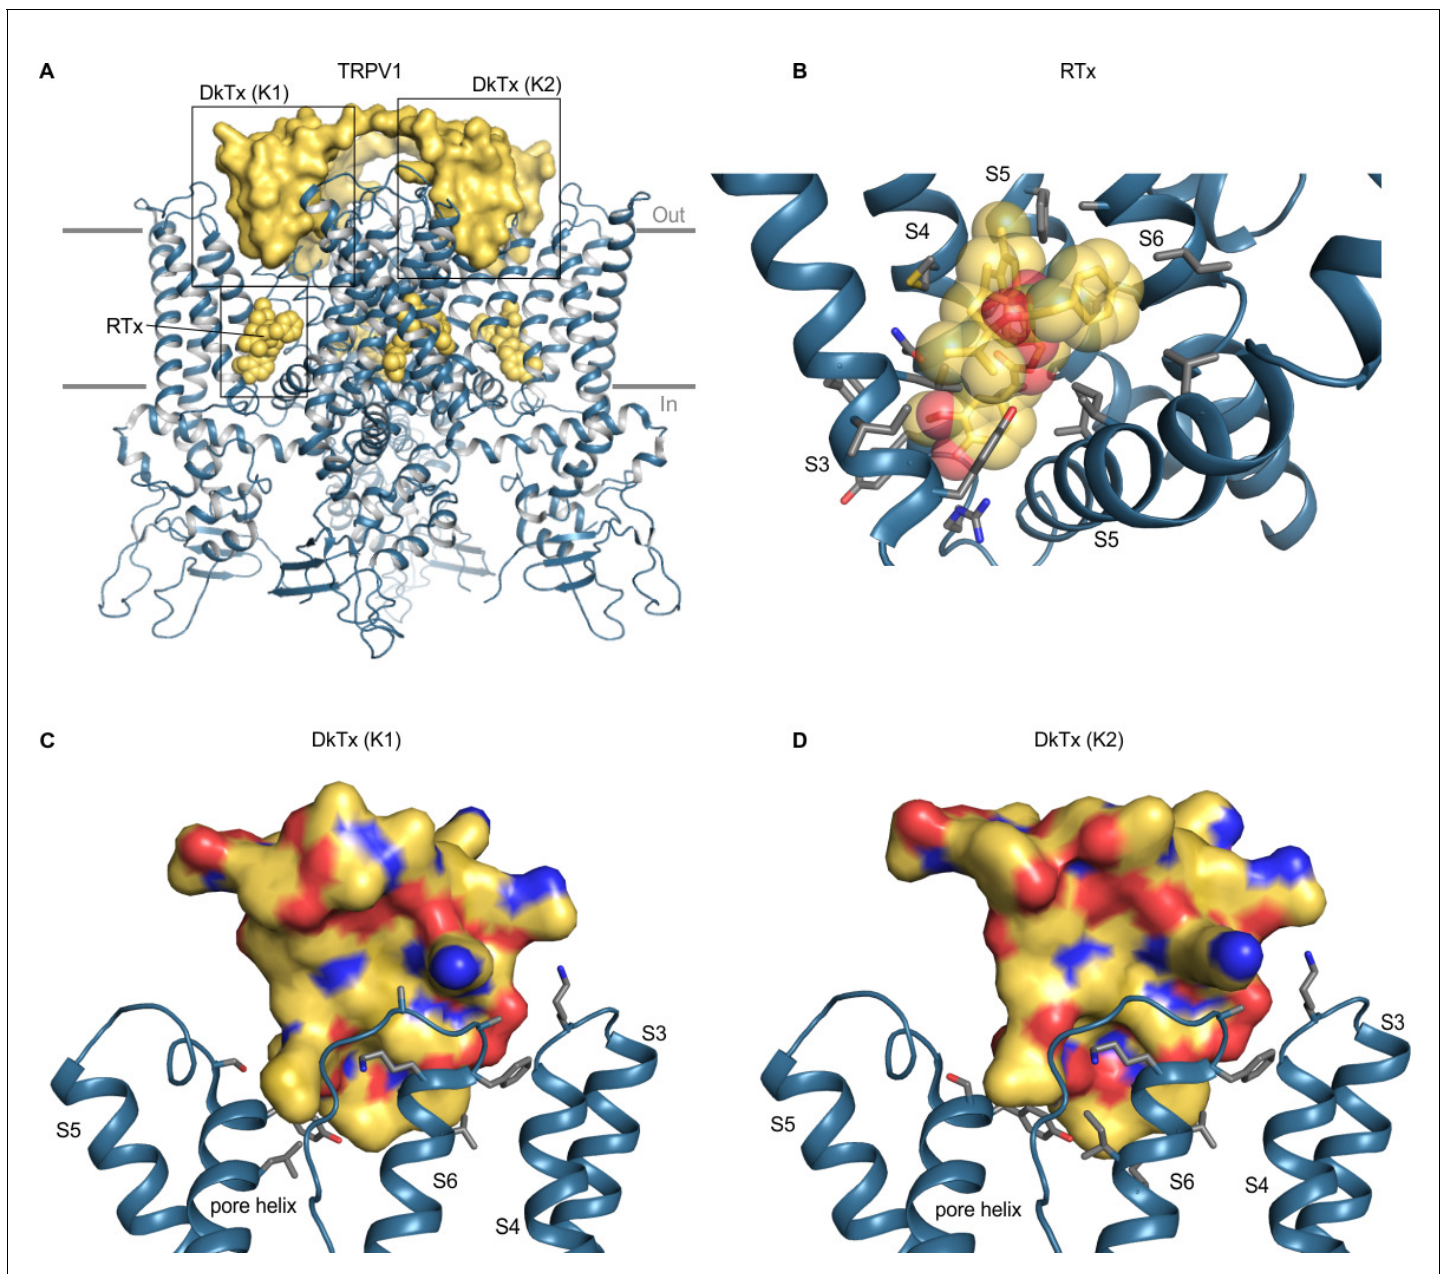

**Figure 7.** Structure of TRPV1 with RTX and DkTx bound. (A) Structure of TRPV1 in nanodiscs with RTX and DkTx shown as yellow spheres and yellow surface, respectively (5irx). (B) Close-up view of the RTX binding pocket with side chains colored by atom: carbon (gray), oxygen (red) and nitrogen (blue). (C,D) Close-up views of the DkTx binding surface showing either K1 or K2 knots, with linker omitted and side chain coloring as in B. Views are from the central pore axis looking out toward the lipid membrane. For clarity, helices without binding pocket residues have been hidden in panels B-D.

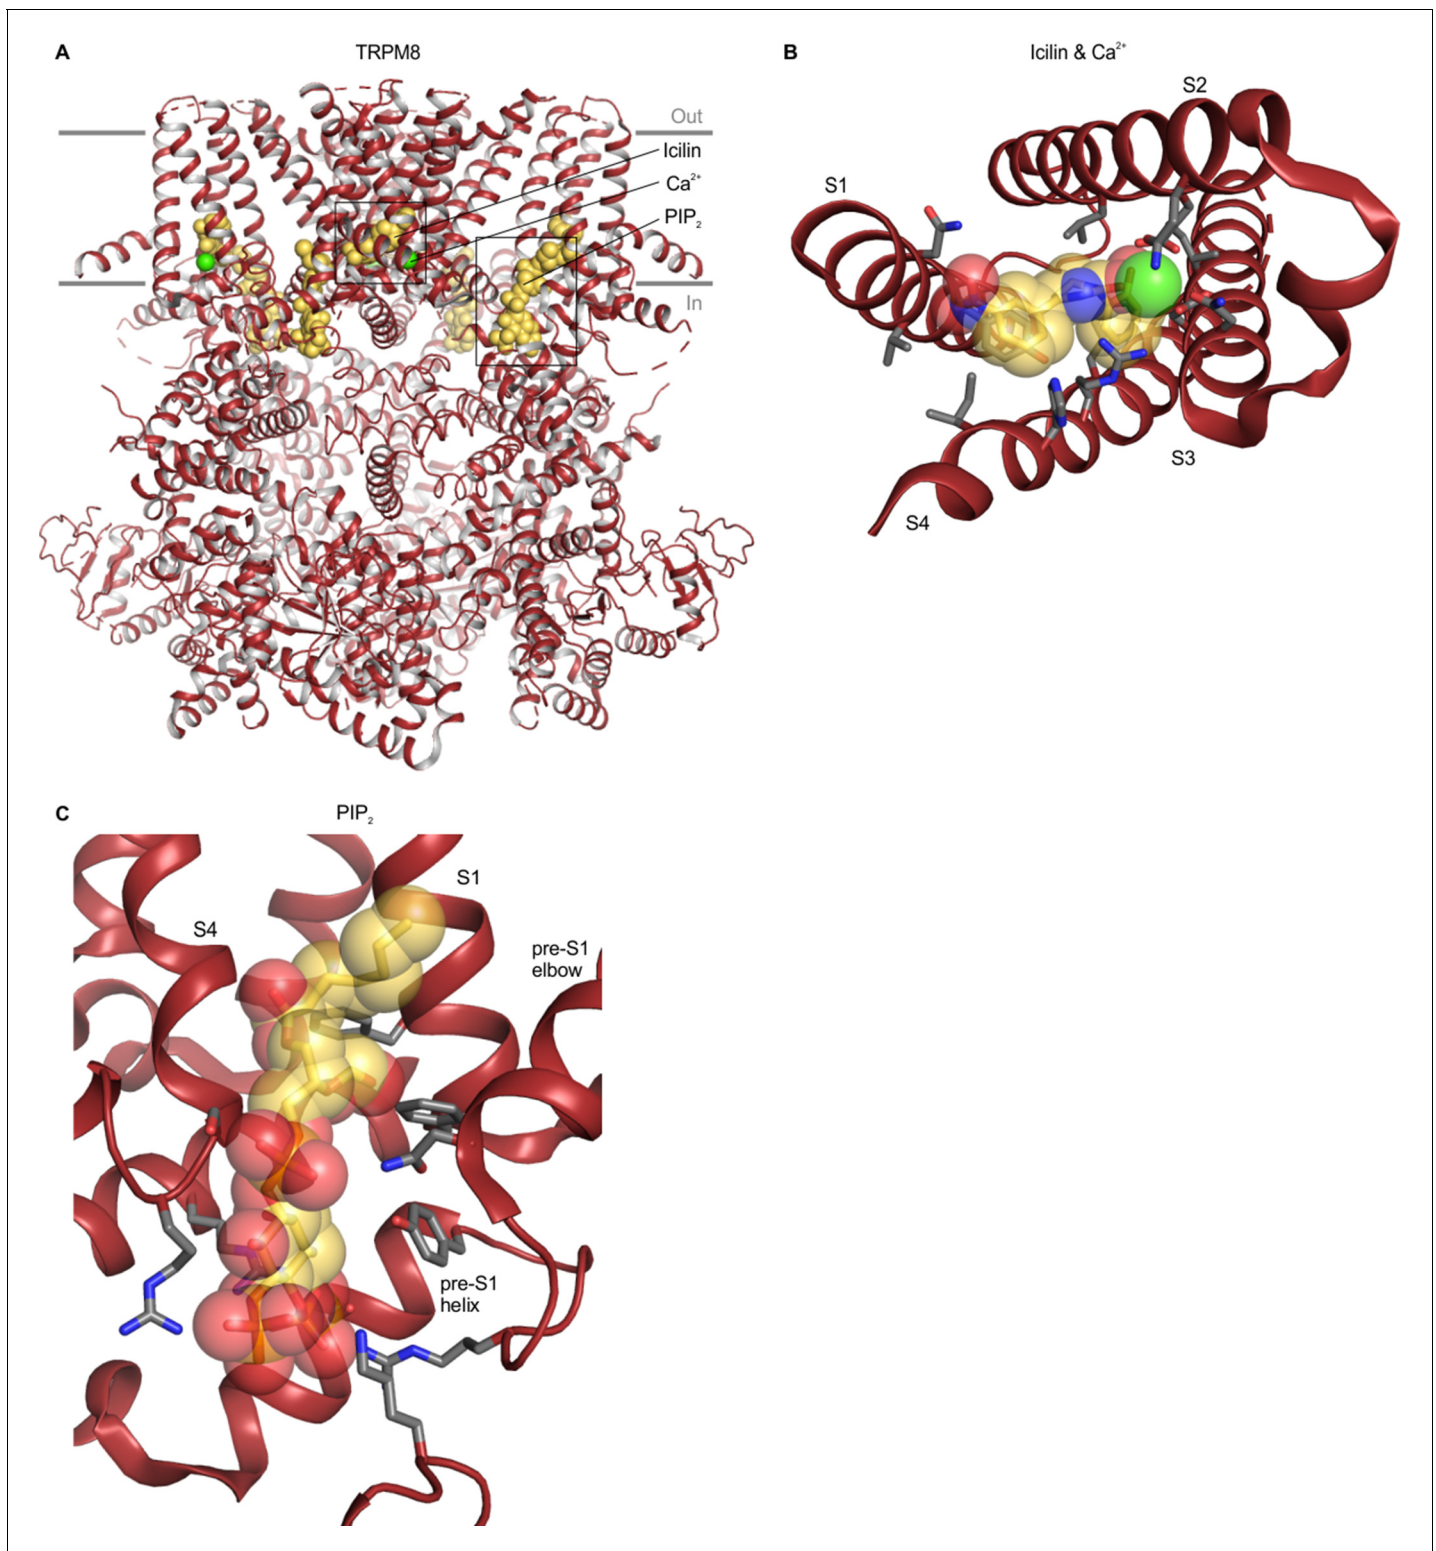

**Figure 8.** Structure of TRPM8 with icilin,  $\text{Ca}^{2+}$  and  $\text{PIP}_2$  bound. (A) Structure of TRPM8 with icilin,  $\text{Ca}^{2+}$  and  $\text{PIP}_2$  bound (6nr3), with yellow spheres for ligands and green spheres for  $\text{Ca}^{2+}$ . (B) Close-up view of the icilin and  $\text{Ca}^{2+}$  binding site from the intracellular side of the membrane with side chains colored by atom: carbon (gray), oxygen (red) and nitrogen (blue). The TRP helix has been removed for clarity. (C) Close-up views of the  $\text{PIP}_2$  binding site, with side chain coloring as in B. For clarity, helices without binding pocket residues have been hidden in panels B and C.



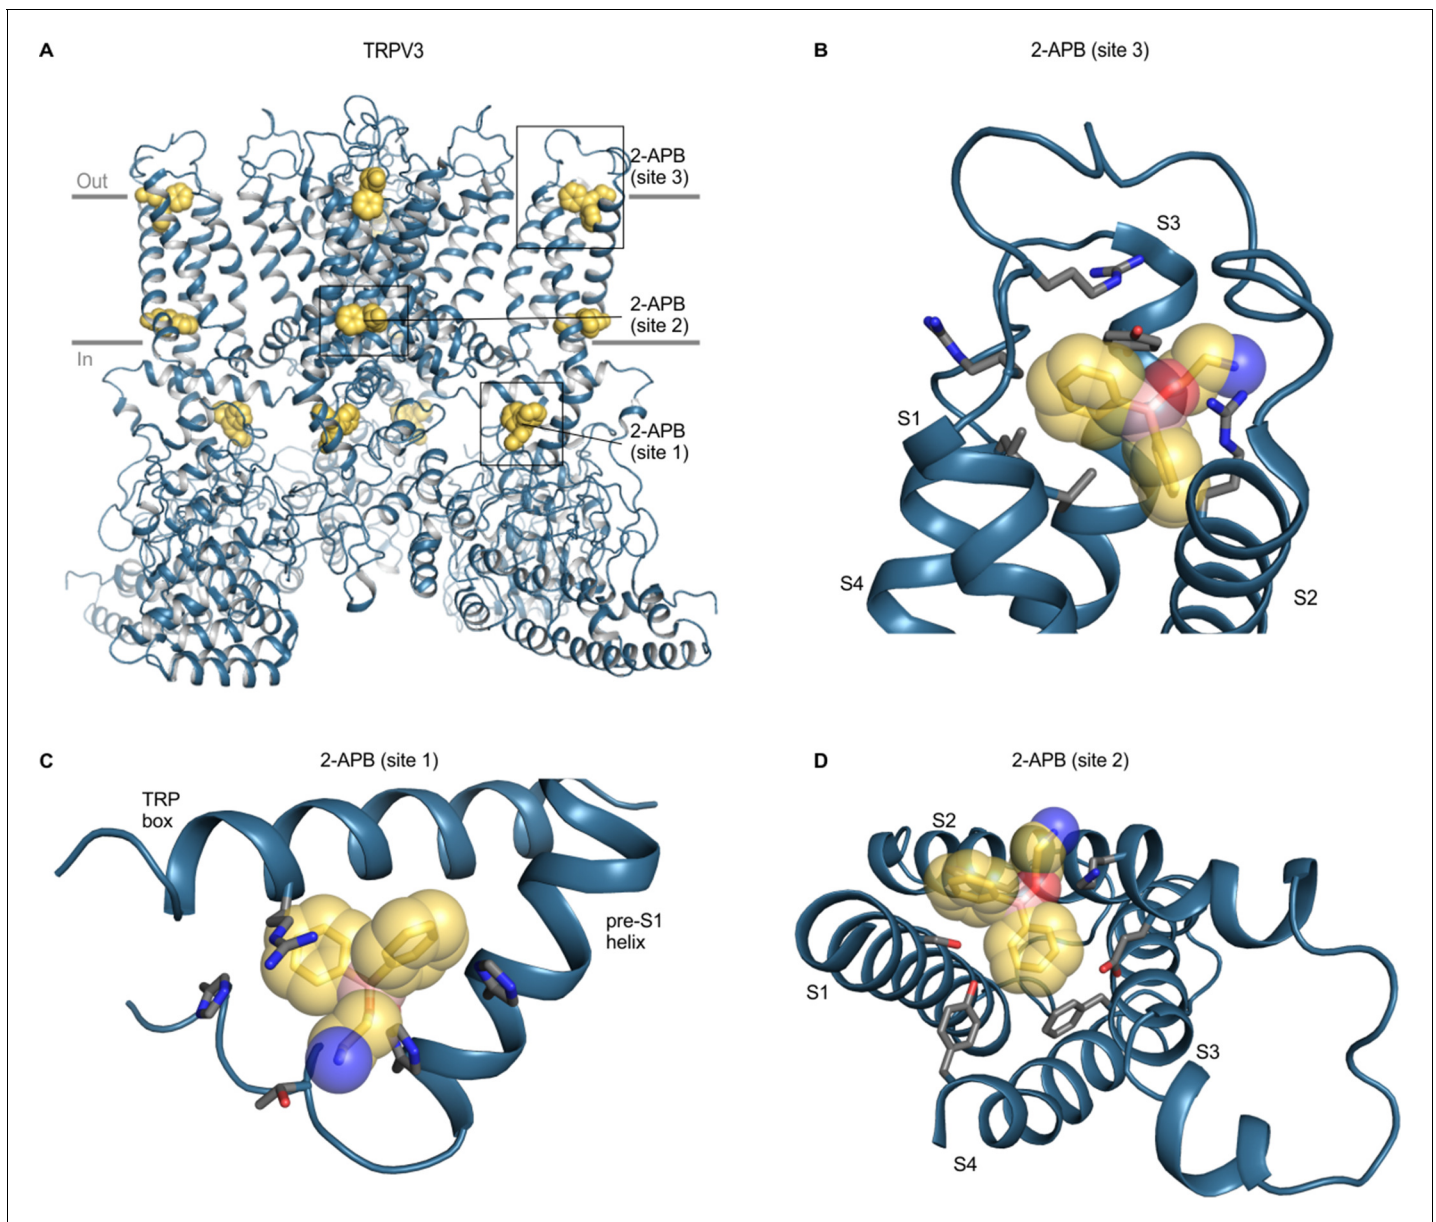

**Figure 9.** Structure of TRPV3 with 2-APB bound. (A) Structure of 2-APB bound TRPV3 (6dvz), with ligands shown as yellow spheres. (B–D) Close-up views of the three 2-APB-binding sites with side chains colored by atom: carbon (gray), oxygen (red) and nitrogen (blue). Boron atoms in 2-APB are colored in pink. Close-up in D is shown from the intracellular side of the membrane from same point of view as **Figure 8B**. For clarity, helices without binding pocket residues have been hidden in panels B–D.

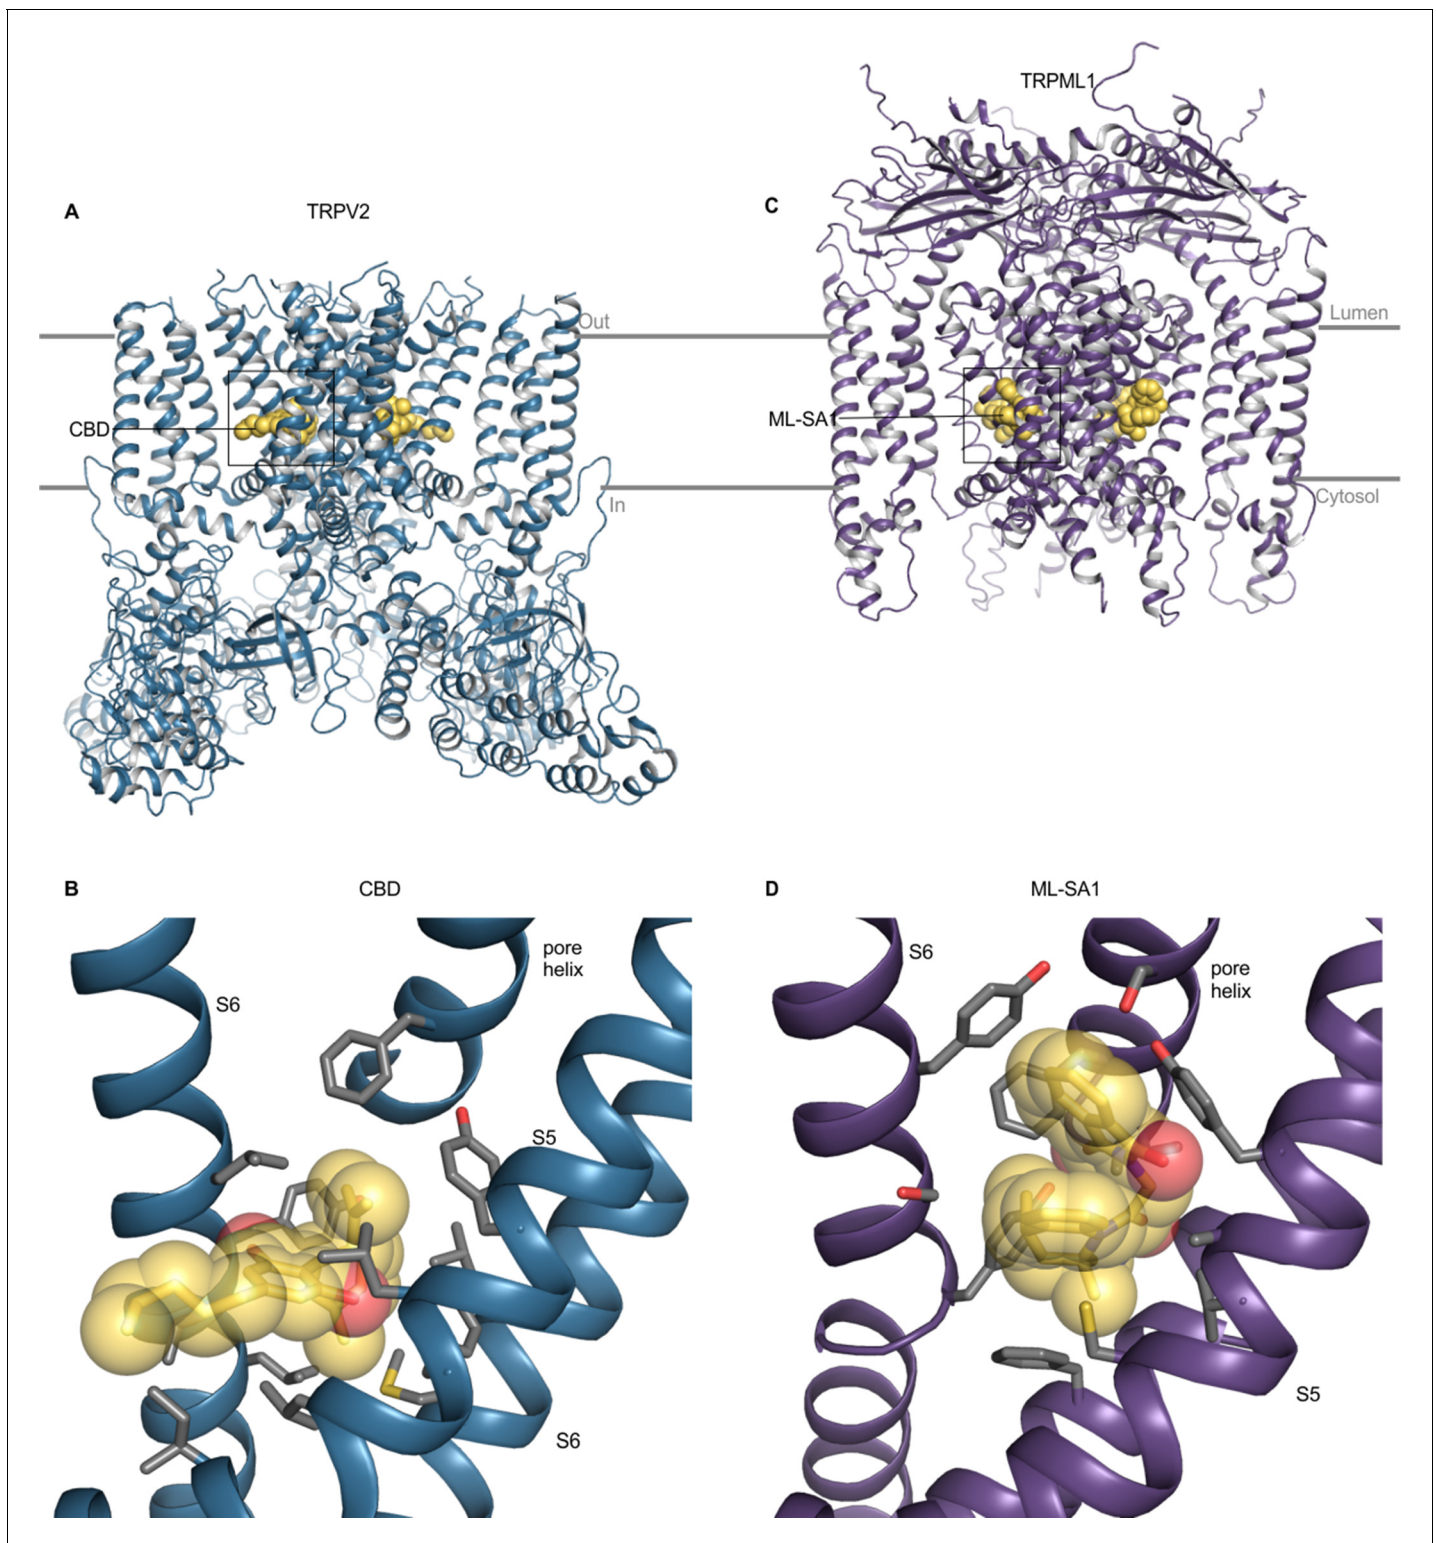

**Figure 9—figure supplement 1.** Ligand-binding sites in TRPV2 and TRPML1. (A) Structure of TRPV2 with CBD bound (6u88), with ligands shown as yellow spheres. (B) Close-up view of the CBD-binding site with side chains colored by atom: carbon (gray) and oxygen (red). For clarity, helices without binding pocket residues have been hidden. (C) Structure of TRPML1 with ML-SA1 bound (5wj9), with carbon (yellow) and oxygen (red). (D) Close-up view of the ML-SA1 binding site with side chains colored by atom: carbon (gray) and oxygen (red). For clarity, helices without binding pocket residues have been hidden. Panels B and D are from same point of view.



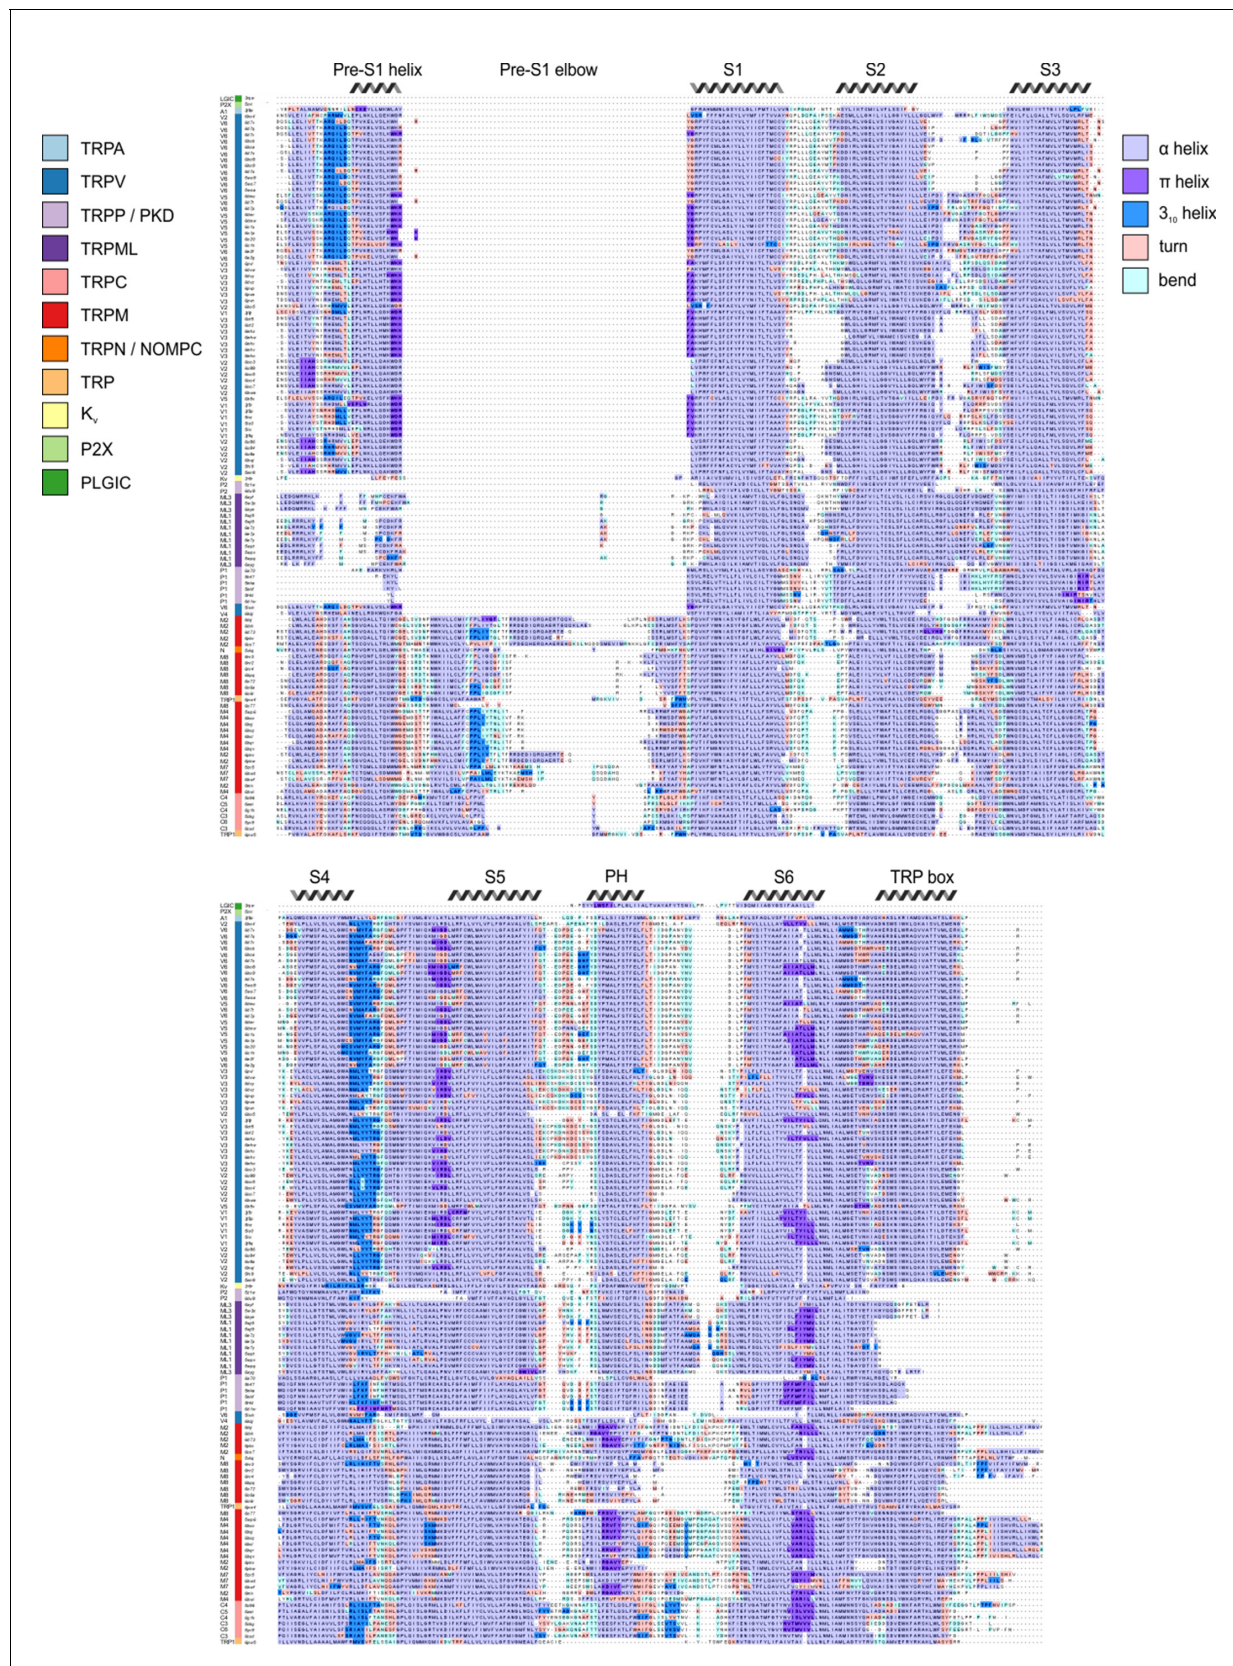

**Figure 10.** Alternate helical conformations with the TM segments of TRP channels. Structure-based sequence alignment, with residues colored based on secondary structure assigned by the DSSP algorithm. Sequences are ordered based on hierarchical clustering from **Figure 2**. Segments, including TM helices and other regions identified in **Figure 1F**, are labeled based on  $\alpha$ -helicity consensus. PH stands for pore helix.

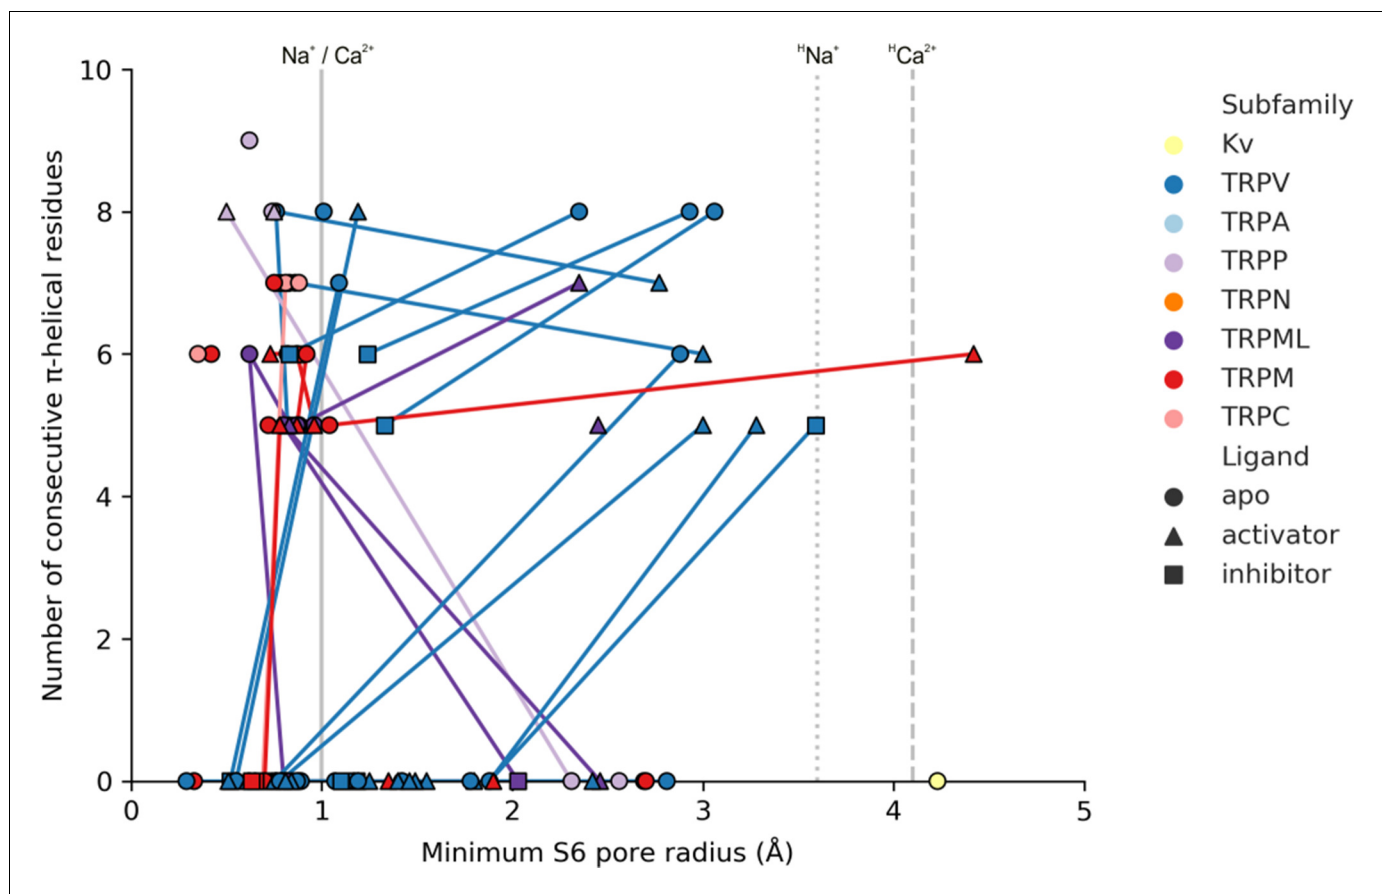

**Figure 10—figure supplement 1.** Relationships between alternate helix conformations and the radius of the internal pore in TRP channels. Plot of the number of consecutive residues in S6 that are identified as  $\pi$ -helical by the DSSP algorithm against the minimal internal pore radius. Each marker represents one structure. Markers that represent the same channel determined under different conditions to obtain different conformations are connected with lines. Grey lines represent radii of dehydrated  $\text{Na}^+$  and  $\text{Ca}^{2+}$  ions (solid), hydrated  $\text{Na}^+$  (dotted,  $^{\text{H}}\text{Na}^+$ ) and hydrated  $\text{Ca}^{2+}$  ions (dashed,  $^{\text{H}}\text{Ca}^{2+}$ ).
